# Supplementary material for: An Integrative Approach to the Identification of Arabidopsis and Rice Genes Involved in Xylan and Secondary Wall Development
Source: PLoS One. 2010 Nov 23;5(11):e15481. doi: 10.1371/journal.pone.0015481 (PMC2990762; doi:10.1371/journal.pone.0015481)
Supplement: Table S1 — 300 co-expressed Arabidopsis genes listed by three baits, IRX9 (At2g37090), IRX10 (At1g27440) and IRX14 (At4g36890). (XLS) [file pone.0015481.s004.xls]

## Sheet: Table S1
Table S1. 300 co-expressed Arabidopsis genes listed by three baits, IRX9 (At2g37090), IRX10 (At1g27440) and IRX14 (At4g36890). The original mutual ranks (MRs) were retrieved from the ATTED-II database (http://atted.jp/). A lower MR indicates stronger co-expression. Gene descriptions were downloaded from the TAIR database (http://www.arabidopsis.org/).
Bait	IRX14 (At4g36890)		IRX9 (At2g37090)		IRX10 (At1g27440)
no.	original MR	AgI	Original MR	AgI	Original MR	AgI
1	5	At1g19170	1.7	At4g33330	3.2	At3g15050
2	6.6	At3g42950	2.8	At5g17420	5.3	At3g50220
3	7.6	At1g27380	4	At5g15630	6.9	At5g15630
4	8.7	At3g28345	7	At1g27380	7.3	At3g42950
5	11.6	At3g15050	7.2	At3g50220	7.8	At1g63910
6	13.2	At1g27440	7.4	At3g18660	8.2	At5g17420
7	17.1	At3g50220	7.9	At4g17220	9.9	At2g41610
8	17.1	At1g11090	8.1	At4g18780	10.2	At2g37090
9	17.8	At2g40120	8.6	At5g06930	10.2	At3g49930
10	20.5	At5g49720	8.7	At2g43050	10.5	At1g07120
11	20.7	At4g32010	9.9	At3g61380	10.7	At3g18660
12	21.4	At2g37090	10.2	At3g16920	10.7	At5g12870
13	23.1	At1g09440	10.2	At1g27440	12	At1g09610
14	23.4	At1g63430	10.4	At4g27435	12	At2g31930
15	24	At1g63910	10.8	At2g03200	12	At1g27380
16	25.1	At1g07120	10.9	At5g44030	12.4	At5g03170
17	30.7	At1g32770	11	At5g60720	13.2	At4g36890
18	31	At2g41610	11.1	At1g62990	14.5	At2g29130
19	34.3	At5g46340	11.6	At1g58160	14.7	At2g20650
20	35.5	At4g18780	11.7	At1g72220	14.9	At1g80170
21	36.2	At1g33800	11.8	At2g47670	15.1	At2g40120
22	36.7	At5g54690	11.8	At1g33800	15.2	At5g01190
23	37.8	At3g18660	12	At3g15050	15.4	At4g28500
24	39	At5g15630	12.4	At5g03170	16	At4g18780
25	39.8	At2g20650	12.5	At2g40120	16.1	At1g32770
26	41.2	At4g33330	12.8	At4g28500	16.4	At5g46340
27	41.6	At3g08550	13.2	At1g24030	16.5	At5g44030
28	43.7	At3g16920	13.3	At5g54690	17.5	At3g16920
29	45	At5g44030	13.4	At5g01360	18.4	At1g22480
30	45.2	At2g31930	13.5	At1g08340	18.9	At5g60720
31	46	At1g09610	15.3	At3g27200	19.1	At1g67510
32	47	At4g10840	15.4	At1g07120	19.8	At5g45970
33	47.6	At5g60720	16.2	At5g42180	20.2	At1g09440
34	48.2	At5g17420	16.9	At2g38080	20.6	At3g49880
35	52.2	At1g22480	18	At1g63910	21.5	At4g17220
36	52.2	At5g59290	18.2	At2g43660	22	At5g54690
37	52.3	At4g27435	19.2	At3g62020	22.2	At4g33330
38	52.4	At1g27920	19.2	At3g23090	22.4	At3g62020
39	53.6	At5g01360	20	At2g41610	23.4	At5g05390
40	54.3	At1g80170	20	At1g63300	23.5	at4g28380
41	56.3	At1g67510	20.8	At2g29130	24	At4g27435
42	57	At5g60570	21.4	At4g36890	24.2	At1g73640
43	57.1	At5g03170	21.4	At1g09610	24.3	At1g08340
44	58	At4g17220	21.5	At1g78815	24.7	At1g63520
45	58.6	At1g14380	22	At5g46340	25.3	At1g27920
46	58.6	At5g23550	24.6	At5g47530	25.4	At2g38080
47	59.6	At2g35100	24.8	At1g16490	25.5	At5g01360
48	59.9	At1g05570	25.2	At5g67210	25.8	At5g60490
49	63.7	At4g17880	25.7	At5g01190	28.1	At1g24030
50	64.5	At2g38080	25.7	At3g45870	28.6	At1g68200
51	66	At2g01570	26.1	At5g61340	29.8	At5g14510
52	68	At2g33990	26.8	At3g56230	30.7	At5g59290
53	69.2	At3g19370	27.6	At5g45970	31	At1g19170
54	70.9	At2g47160	28.4	At2g31930	31.6	At3g45870
55	71.6	At5g01190	29.4	At1g32770	33.2	At2g44745
56	72.5	At4g28500	30.1	At5g60020	34	At4g22680
57	72.5	at3g59690	30.7	At1g27920	34.5	At1g31720
58	73	At5g60490	31	At1g22480	34.8	At5g40020
59	74.9	At2g28760	31	At2g28760	35.1	At4g23496
60	75.5	At4g29350	31.2	At5g05390	35.9	At5g60020
61	78.2	At4g14760	32.3	At1g21140	36.7	At1g79620
62	80.6	At4g34050	32.8	At1g72230	37.1	At5g06930
63	83.2	At4g29080	35.2	At2g20650	37.2	At1g33800
64	83.2	At3g48140	36.2	At5g48560	38.5	At1g66810
65	85	At2g29130	36.9	At3g21710	39.8	At1g78815
66	88	At4g22580	37.5	At1g09440	41.4	At1g19940
67	88.5	At2g43660	37.6	At5g15490	42.9	At2g43660
68	89.9	At1g71010	38.1	At5g59290	43.8	At3g61910
69	91.6	At5g45970	38.4	At1g19940	45.6	at3g59690
70	92	At5g34940	38.5	At1g32100	46	At5g65040
71	95.1	At3g55420	40	At1g19170	47.3	At1g32100
72	95.5	At1g55610	40.8	At4g26220	47.8	At5g63580
73	95.8	At5g48560	42.1	at3g59690	49.5	At5g67210
74	97.2	At2g41770	42.2	At1g79180	50	At1g74660
75	97.4	At1g02500	44.5	At4g16400	50.2	At5g40630
76	97.8	At3g62020	44.9	At1g29050	50.4	At1g72220
77	99.6	At2g04850	45.9	At5g16600	51.8	At2g28760
78	102.7	At1g79620	46.7	At5g02640	52	At2g31900
79	106	At5g59305	46.7	At5g25830	55	At5g59305
80	106.2	At2g36910	47	At1g30840	55.3	At1g14390
81	106.3	At3g57420	47.2	At2g17940	56.7	At5g48560
82	106.8	At5g42180	47.4	At1g74660	57.5	At5g42180
83	107.8	At1g72230	48.9	At5g40020	58.5	At4g08160
84	109.7	At5g63580	49.4	At5g60490	58.7	At5g02640
85	110.3	At2g38120	49.8	At1g31720	58.8	At5g24510
86	111.5	At1g08280	50.2	At5g47635	59.2	At2g17940
87	113.4	At1g24030	50.2	At1g33700	60.7	At1g16490
88	113.5	At1g08340	52.9	At5g12870	63	At1g72990
89	114.5	At1g06470	53.3	At1g73640	63.6	At5g48740
90	115.3	At1g78815	54.3	At1g47410	64.3	At1g79180
91	117.5	At4g12910	57.9	At1g79620	64.7	At5g25830
92	119.5	At4g11150	60.6	At4g30110	65.5	At1g47485
93	121.4	At1g31720	61.1	At1g01900	67.2	At2g04850
94	122.1	At4g30110	61.5	At4g22680	67.9	At2g03450
95	123.5	At5g67210	63.5	At1g07750	69	at5g38010
96	123.5	At2g32580	63.7	At4g33810	70.3	At3g59845
97	128.8	At5g20650	64.7	At1g63120	71.2	At4g14380
98	129.6	At1g47485	64.9	At1g25530	71.6	At3g02500
99	131.5	At5g06610	67.5	At1g61810	72.1	At1g47410
100	132.7	At3g21190	68.2	At4g31730	72.7	At5g16600
101	136.7	at5g38010	68.6	At5g14510	74	At2g03200
102	136.7	At4g29100	69.4	At1g14390	74.4	At5g46115
103	140.8	At2g44745	70.4	At1g28470	75.3	At4g16400
104	142.2	At3g05280	71	at4g28380	79.7	At4g01680
105	144.6	At4g12650	71.3	At5g63580	80	At4g09990
106	144.9	At4g23496	72	At3g42950	80.6	At1g47655
107	146.4	At5g61840	74.2	At3g52370	81.9	At5g16490
108	148.3	At5g14510	76.4	At4g08160	82.8	At3g08490
109	148.7	At5g18520	79.7	At3g02500	83	At4g33450
110	149.3	At4g10380	82	At2g03450	83.7	At2g46760
111	151	At5g05390	82.2	At4g09990	84.4	At5g14090
112	151.8	At3g46830	83.6	At5g26620	85.2	At1g77700
113	153.2	At2g36880	84	At4g14380	85.7	At5g37970
114	157.2	At5g12260	84.3	At3g59010	86.5	At1g70500
115	157.4	At1g28120	84.3	At5g58980	87	At2g38320
116	160.1	At1g73640	84.3	At1g72990	87.9	At4g04410
117	160.8	At4g09630	84.5	At2g04850	88.5	At4g30110
118	162.5	At4g38920	85.6	At1g80170	88.8	At3g15220
119	162.5	At3g02350	85.6	At2g27740	90.1	At3g59010
120	163	At2g35860	86.9	At1g72200	92	At4g34970
121	163.8	At4g13890	87.5	At3g05890	94.2	At1g19300
122	164	At3g17420	88.8	At3g16340	94.4	At1g58370
123	165.7	At5g65670	90.3	At1g20160	94.8	At1g31490
124	166.1	At3g63120	90.6	At4g23496	95.5	At1g54790
125	168.6	At1g45688	91.7	At5g58500	95.9	At1g58070
126	169.1	At1g64620	91.8	At5g48740	96	At1g58160
127	170	At2g41900	93	At4g18640	96.1	At2g20550
128	170.3	At5g35730	93.7	At1g19190	97.9	At3g30530
129	170.6	At1g04410	94.2	At3g10340	99.7	At5g61340
130	172.2	At2g44680	95.1	At3g19370	100	At2g27740
131	174.1	At3g45600	95.3	At2g01660	103	At3g13730
132	176.8	At1g58160	95.8	At2g44745	103.2	At5g01930
133	177.4	At3g52930	96.1	at5g38010	105.1	At5g26620
134	178.3	At1g55760	96.8	At2g33990	106.7	At2g35700
135	178.9	At3g14410	97.1	At2g31900	107.1	At1g75590
136	183.2	At2g03450	97.4	At5g55950	107.9	At5g58980
137	184.1	At4g36860	97.5	At5g40630	108.5	At3g56230
138	190.6	At1g52420	97.7	At5g46115	108.9	At4g33810
139	194.5	At1g14390	99.3	At3g49880	109.3	At3g56700
140	194.8	At5g59890	99.4	At4g01140	109.4	At1g20160
141	196.3	At5g60020	99.5	At4g33450	109.6	At2g40530
142	196.6	At1g52760	99.6	At1g54790	109.9	At5g23810
143	197.4	At2g17150	100.2	At5g38610	110.1	At3g09710
144	197.5	At3g58600	102.5	At1g64620	111.4	At1g69080
145	198.6	At3g10630	103.1	At1g70500	113.5	At4g18640
146	198.8	At3g05270	104.2	At1g66810	117.8	At5g26330
147	199.7	At4g09890	107.1	At3g59845	120.3	At1g17950
148	201.1	At1g16490	107.2	At1g68200	124	At5g50130
149	202.7	At5g40020	110.7	At1g17950	125.7	At4g39410
150	203.5	At3g53610	111.7	At3g27960	127.1	At1g21890
151	203.9	At1g68360	113.8	At3g07130	128.3	At3g21710
152	205.1	At4g13940	114.1	At1g30515	131	At1g72230
153	205.8	At2g16510	114.3	At3g17420	131.2	At1g62990
154	206.9	At1g79940	114.9	At1g75280	135	At5g38000
155	209.8	At3g49880	116.5	At2g38320	135.9	At2g28870
156	211.1	At4g17310	118.3	At5g65040	136.5	At5g16570
157	214.9	At3g51710	118.6	At1g07090	137.8	At3g51710
158	215	At3g13870	119.2	At1g14380	139.3	At1g70500
159	215.3	At1g28440	121.5	At5g11230	139.7	At4g03340
160	215.3	At1g13440	123.2	At1g18880	142.3	At2g37280
161	216	At5g37310	123.3	At5g48930	142.9	At2g43050
162	217.9	At2g11140	123.5	At5g03260	143	At1g79760
163	219.9	At3g22540	124.6	At5g16490	146.7	At3g23090
164	220.1	At1g79180	124.9	At5g50720	146.8	At5g03260
165	220.1	At5g46115	125.1	At3g08490	149.5	At5g65170
166	220.8	At1g74660	126.3	At2g28250	150.4	At2g23360
167	221.5	At1g55740	127.2	At1g63520	153.1	At4g00230
168	224	At4g39990	128.2	At5g03530	153.5	At5g04330
169	224.5	At5g48740	129	At3g21550	154.8	At1g66960
170	226.7	At5g11740	129.8	At5g38000	157.5	At5g15490
171	228.6	At3g59845	135.4	At4g03340	159.8	At5g67090
172	228.9	At1g76550	136.6	At3g51710	164	At3g19370
173	229.5	At1g72160	140.6	At1g47485	164.2	At3g12890
174	230.8	At3g50590	141	At3g21240	166.9	At1g14380
175	230.8	At1g62990	144.2	At2g24762	167.8	At2g47670
176	231	At1g18880	148	At1g19300	168.1	At1g02500
177	231.8	At5g12250	148	At1g68795	173.2	At3g16340
178	232.8	At4g30200	149.7	At1g58070	177.3	At5g02440
179	232.9	At4g39390	151.7	At2g46760	177.8	At3g62160
180	232.9	At5g67470	151.9	At1g26820	178.3	At1g20850
181	235.7	At5g26330	152.1	At4g34050	179.6	At3g54040
182	235.8	At2g38090	153.2	At3g08630	182.2	At1g71930
183	236.3	At1g19430	153.5	At1g63000	182.7	At4g32780
184	236.3	At2g03600	155.2	At2g40900	182.8	At3g61380
185	236.5	At5g02440	158	At5g62150	182.9	At3g57420
186	238.2	At5g56040	159.3	At3g15990	183.5	At2g28250
187	239.1	At2g31390	160.3	At2g22850	184.3	At3g17280
188	239.1	At5g07460	161.7	At3g56730	186.9	At1g63300
189	240.6	At2g20190	162.1	At2g24170	187.7	At1g07090
190	241.7	At4g09990	162.3	At1g67510	188.3	At1g05310
191	241.8	At4g22160	163	At2g23360	188.7	At5g15900
192	242.3	At4g24060	166	At4g37970	189.2	At1g79420
193	243.3	At1g56230	166.5	At5g26330	194.8	At1g30760
194	243.9	At4g18070	167.3	At2g20550	195.1	At5g63540
195	243.9	At1g56700	168.8	At4g34970	195.1	At1g67030
196	243.9	At5g55500	169.4	At1g58370	195.4	At1g18880
197	245.3	At3g27960	170	At3g25290	195.7	At2g33990
198	245.9	At2g43130	171	At3g61910	196.2	At5g47635
199	247.2	At3g53520	171.3	At3g09710	199	At2g20680
200	248.2	At4g08160	173.3	At1g35625	201.7	At3g28345
201	248.3	At4g01850	173.8	At5g01970	202.1	At2g11140
202	249.2	At5g25100	176.2	At2g19580	204.5	At2g20780
203	251.1	At5g23860	176.2	At1g01640	205.1	At1g49210
204	251.2	At3g20100	176.4	At2g28110	206.8	At1g68795
205	251.7	At2g28870	176.7	At2g37750	207	At1g55610
206	252.8	At3g57650	178.5	At5g40960	208.4	At2g37900
207	253.7	At5g58970	179.2	At3g29630	211.1	At5g11410
208	255.2	At5g49980	179.7	At3g49930	211.1	At5g28490
209	255.6	At2g20680	179.7	At1g05260	213.8	At4g09480
210	255.8	At2g29970	182.3	At1g52760	215.6	At2g24070
211	256.6	At3g07130	182.7	At4g24430	219.3	At3g02980
212	257.9	At3g45310	186.2	At5g15180	219.8	At5g01970
213	260.5	At3g21710	187.3	At5g62580	221.1	At5g48930
214	261.1	At1g32100	190.2	At1g70500	223.1	At3g27960
215	261.1	At3g13730	191.7	At3g17940	223.2	At2g17260
216	264.5	At5g05950	193.4	At4g09480	224.8	At1g64620
217	267.2	At2g01070	194.6	At1g34060	225.1	At1g63120
218	269.1	At4g33640	195.8	At5g09220	225.2	At4g39320
219	271.1	At1g28680	197	At1g62800	226.9	At3g05270
220	271.3	At5g56660	197.8	At2g33310	227.1	At4g26220
221	271.4	At1g30510	200.3	At5g05960	230	At1g28080
222	272.5	At5g15490	201.2	At4g30460	230.3	At4g10840
223	273.4	At5g20885	201.8	At1g69230	234.1	At2g40890
224	273.7	At1g19300	202.2	At4g01680	235.3	At3g49070
225	274	At1g59650	202.9	At4g35060	236.5	At1g61810
226	275.9	At4g16920	203	At5g64530	236.8	At5g62380
227	276.4	At1g18580	206.4	At5g04470	237.5	At4g32010
228	277.8	At1g79970	208.4	At3g54040	238	At4g22160
229	278.1	At2g18160	211.4	At1g76250	238.2	At3g44730
230	278.2	At5g03530	213.2	At1g60960	241.2	At4g37970
231	278.6	At1g80530	214.2	At4g26320	246.5	At3g59480
232	279.2	At2g31900	215	At1g11070	246.8	At2g40470
233	279.9	At4g22680	215.1	At2g28870	247.1	At2g45890
234	281.3	At1g05850	215.7	At1g02500	247.3	At1g36940
235	281.7	At1g30840	217.6	At5g07460	247.6	At5g47530
236	284.8	At1g68200	218.7	At1g67030	248.9	At3g28960
237	285.2	At2g19580	220.7	At4g04410	251.7	At5g58520
238	288.6	At3g13772	220.8	At2g23550	253.9	At1g80520
239	291.6	At5g54160	221.7	At5g10220	254.1	At3g17420
240	292.5	At5g38000	223.8	At5g14500	254.3	At5g05960
241	294.9	At4g31140	224.4	At4g11180	255.2	At1g30840
242	295.4	At1g14340	224.7	At1g03920	256.6	At1g55180
243	296.5	At4g08150	226.3	At1g26300	257.4	At5g50720
244	298.8	At5g08290	227.6	At2g37280	258.1	At4g23720
245	298.9	At5g61340	228.2	At5g59305	259.1	At5g38610
246	300.8	At2g23360	231.4	At1g79760	260.8	At1g01640
247	300.9	At1g66810	231.7	At4g28370	261.3	At1g55810
248	302	At4g39320	231.8	At3g62740	261.3	At1g12260
249	303.8	At3g23820	231.8	At2g36710	262.7	At1g53290
250	304.1	At5g58980	237.5	At1g02950	263.4	At1g53660
251	311	At3g17940	238.8	At3g02980	264.2	At4g26320
252	311.3	At3g07340	238.9	At5g66460	268.6	At1g43790
253	311.4	At1g47410	241	At1g76550	268.8	At4g31730
254	312.1	At1g44800	241	At4g00230	271.6	At1g03010
255	312.3	At5g65040	241.4	At2g24070	273.7	At4g25434
256	312.8	At2g17940	241.5	At1g47840	275.5	At5g66630
257	315.6	At1g07090	242.1	At1g21890	276.2	At5g55950
258	317	At1g64090	243.1	At3g22070	278.4	At5g58360
259	317	At5g11230	243.7	At3g25930	281.7	At3g03860
260	319.6	At3g11130	243.7	At4g29230	282.9	At3g17380
261	319.8	At4g17770	243.9	At5g66170	286.5	At2g31110
262	320.3	At3g61380	244.1	At4g09890	289	At1g75280
263	321.3	At2g39705	244.3	At3g30530	291.2	At1g02950
264	321.4	At3g16340	244.7	At3g58600	292.6	At3g48970
265	322.8	At1g72220	244.8	At1g71930	292.7	At5g51670
266	323.9	At1g23190	245.6	At1g13830	294.9	At3g22540
267	324	At1g34270	246.1	At5g37970	298.1	At1g56720
268	327.8	At4g27320	246.5	At2g40890	299	At5g58500
269	328.2	At1g75500	247.5	At1g69080	301.3	At2g41300
270	330	At1g74510	251.4	At2g24580	304.5	At5g24310
271	334.7	At2g31370	252	At1g07380	304.8	At4g35290
272	334.7	At3g12890	252.2	At5g47720	305.6	At1g52760
273	334.9	At1g30890	253.1	At3g22540	305.7	At1g10800
274	339.6	At2g26600	256.5	At2g38360	306.9	At3g48185
275	345.5	At3g52880	261.8	At3g28960	308.9	At2g40200
276	345.5	At1g48230	263.7	At1g60710	313.6	At1g30900
277	346.8	At3g09410	263.9	At5g43180	314.4	At1g29200
278	347.6	At3g48185	267.3	At1g44800	316.1	At1g80730
279	348.6	At2g03200	267.9	At1g51680	316.6	At1g76250
280	348.6	At5g24310	271.3	At3g56170	320.2	At2g38090
281	350.8	At3g21270	272.6	At3g07340	321.4	At2g36880
282	351.4	At1g79420	273.5	At5g24510	321.8	At5g07460
283	352.5	At5g11710	274.7	At1g48930	323	At3g55420
284	355.9	At1g15370	275	At2g35860	323.9	At1g10460
285	364	At4g02080	275.3	At5g07220	325.4	At1g25530
286	368	At3g59360	277.4	At3g44730	326.1	At5g09220
287	368.6	At5g58930	279	At5g03190	326.6	At1g28470
288	369.4	At3g07690	280.5	At1g73370	327.3	At3g26800
289	370.3	At1g55810	282.6	At1g10460	334.5	At4g35350
290	370.7	At1g07380	284.1	At2g35700	334.9	At1g21220
291	371.4	At3g17430	285.2	At3g21840	337.6	At5g39090
292	371.6	At2g24762	286.9	At2g20680	338.3	At1g72200
293	373.2	At5g05960	288.1	At5g38280	338.9	At3g07130
294	374.6	At3g09710	289.1	At2g12400	340.8	At5g17600
295	377.9	At5g65480	289.6	At5g52500	351.3	At3g22070
296	378	At1g75590	290.6	At1g10970	353.5	At5g24170
297	379.6	At3g23000	290.7	At3g23430	354	At2g24762
298	379.9	At5g20470	290.7	At5g04330	354.9	At3g55300
299	380	At5g05980	291.6	At2g38090	354.9	At4g15093
300	380.2	At1g20160	295.6	At1g13600	356.9	At1g03920
