# Supplementary material for: An Integrative Approach to the Identification of Arabidopsis and Rice Genes Involved in Xylan and Secondary Wall Development
Source: PLoS One. 2010 Nov 23;5(11):e15481. doi: 10.1371/journal.pone.0015481 (PMC2990762; doi:10.1371/journal.pone.0015481)
Supplement: Table S2 — The 124 shared Arabidopsis genes. (XLS) [file pone.0015481.s005.xls]

## Sheet: Table S2
Table S2. The 124 shared Arabidopsis genes. The 124 Arabidopsis genes were obtained from the intersection of co-expressed genes from three baits, IRX9 (At2g37090), IRX10 (At1g27440) and IRX14 (At4g36890). The MRs for each bait gene is the original MR + 1. MR average was calculated as the geometric mean of the individual MRs. Gene descriptions were downloaded from TAIR. Pfam IDs were downloaded fr…
Arabidopsis 124 genes in the intersection
AGI	MR by irx14	MR by Irx9	MR by IRX10	MR average	Discription (TAIR)	Pfam ID
At1g27440	14.2	11.2	1	5.41796	GUT2; FUNCTIONS IN: glucuronoxylan glucuronosyltransferase activity, catalytic activity; INVOLVED IN: secondary cell wall biogenesis, glucuronoxylan biosynthetic process; LOCATED IN: endomembrane system, membrane; EXPRESSED IN: 25 plant structures; EXPRESSED DURING: 14 growth stages; CONTAINS InterPro DOMAIN/s: Exostosin-like (InterPro:IPR004263); BEST Arabidopsis thaliana protein match is: GUT1;…	PF03016
At2g37090	22.4	1	11.2	6.30699	IRREGULAR XYLEM 9 (IRX9) The IRX9 gene encodes a putative family 43 glycosyl transferase. It was coordinately expressed with the cellulose synthase subunits during secondary cell wall formation. Cell wall analysis revealed a decrease in the abundance of xylan in the irx9 mutant, indicating that IRX9 is required for xylan synthesis. Mutants have irregular xylem phenotype suggesting a role in secon…	PF03360
At4g36890	1	22.4	14.2	6.8262	IRREGULAR XYLEM 14 (IRX14) The IRX14 gene encodes a putative family 43 glycosyl transferase that contributes to xylan biosynthesis. It was identified based on its gene expression co-variance with the IRX3 gene involved in secondary cell wall synthesis. A biochemical assay using the irx14 mutant indicates that IRX14 might function in xylose chain elongation.	PF03360
At3g15050	12.6	13	4.2	8.82784	IQ-DOMAIN 10 (IQD10) IQ-domain 10 (IQD10); FUNCTIONS IN: calmodulin binding; INVOLVED IN: biological_process unknown; LOCATED IN: chloroplast; EXPRESSED IN: 9 plant structures; EXPRESSED DURING: 4 anthesis, petal differentiation and expansion stage; CONTAINS InterPro DOMAIN/s: IQ calmodulin-binding region (InterPro:IPR000048); BEST Arabidopsis thaliana protein match is: iqd9 (IQ-domain 9); calmod…	PF00612
At1g27380	8.6	8	13	9.63483	ROP-INTERACTIVE CRIB MOTIF-CONTAINING PROTEIN 2 (RIC2) encodes a member of a novel protein family that contains contain a CRIB (for Cdc42/Rac-interactive binding) motif required for their specific interaction with GTP-bound Rop1 (plant-specific Rho GTPase). Interacts with Rop1 and is involved in pollen tube growth and function. Protein most similar to RIC4 (family subgroup V). Gene is expressed i…	PF00786
At3g50220	18.1	8.2	6.3	9.77862	unknown protein; INVOLVED IN: biological_process unknown; LOCATED IN: cellular_component unknown; EXPRESSED IN: petal, inflorescence meristem, flower; EXPRESSED DURING: petal differentiation and expansion stage; CONTAINS InterPro DOMAIN/s: Protein of unknown function DUF579, plant (InterPro:IPR006514); BEST Arabidopsis thaliana protein match is: unknown protein (TAIR:AT5G67210.1); Has 161 Blast h…	PF04669
At5g15630	40	5	7.9	11.6471	IRREGULAR XYLEM 6 (IRX6) Encodes a member of the COBRA family, similar to phytochelatin synthetase. Involved in secondary cell wall biosynthesis. Mutants make smaller plants with reduced levels of cellulose and cell wall sugars.	PF04833
At5g17420	49.2	3.8	9.2	11.9815	IRREGULAR XYLEM 3 (IRX3) Encodes a xylem-specific cellulose synthase that is phosphorylated on one or more serine residues (on either S185 or one of S180 or S181).	PF03552
At4g33330	42.2	2.7	23.2	13.8268	PLANT GLYCOGENIN-LIKE STARCH INITIATION PROTEIN 3 (PGSIP3) expressed protein, hypothetical protein from Arabidopsis thaliana chromosome 1, F7G19.14,PID:g2342684	PF01501
At3g18660	38.8	8.4	11.7	15.623	PLANT GLYCOGENIN-LIKE STARCH INITIATION PROTEIN 1 (PGSIP1) Plants expressing an RNAi construct specifically targeting PGSIP1 was shown to have a dramatically reduced amount of starch.	PF01501
At2g40120	18.8	13.5	16.1	15.9872	protein kinase family protein; FUNCTIONS IN: protein serine/threonine kinase activity, protein kinase activity, kinase activity, ATP binding; INVOLVED IN: protein amino acid phosphorylation; LOCATED IN: cytoplasm; EXPRESSED IN: 22 plant structures; EXPRESSED DURING: 13 growth stages; CONTAINS InterPro DOMAIN/s: Protein kinase, core (InterPro:IPR000719), Serine/threonine protein kinase (InterPro:I…	PF00069
At1g63910	25	19	8.8	16.1086	MYB DOMAIN PROTEIN 103 (AtMYB103) member of MYB3R- and R2R3- type MYB- encoding genes	PF00249
At3g42950	7.6	73	8.3	16.6369	glycoside hydrolase family 28 protein / polygalacturonase (pectinase) family protein; FUNCTIONS IN: polygalacturonase activity; INVOLVED IN: carbohydrate metabolic process; LOCATED IN: endomembrane system; EXPRESSED IN: 18 plant structures; EXPRESSED DURING: 8 growth stages; CONTAINS InterPro DOMAIN/s: Pectin lyase fold/virulence factor (InterPro:IPR011050), Glycoside hydrolase, family 28 (InterP…	PF00295
At1g07120	26.1	16.4	11.5	17.0109	FUNCTIONS IN: molecular_function unknown; INVOLVED IN: biological_process unknown; LOCATED IN: chloroplast envelope; EXPRESSED IN: leaf whorl, petal, inflorescence meristem, flower; EXPRESSED DURING: 4 anthesis, petal differentiation and expansion stage; BEST Arabidopsis thaliana protein match is: proline-rich family protein (TAIR:AT4G18570.1); Has 197 Blast hits to 171 proteins in 40 species: Ar…	.
At4g18780	36.5	9.1	17	17.8071	IRREGULAR XYLEM 1 (IRX1) Encodes a member of the cellulose synthase family involved in secondary cell wall biosynthesis. Mutants have abnormal xylem formation, reduced cellulose content, and enhanced drought and osmotic stress tolerance. Mediates resistance towards bacterial pathogens via ABA. Confers resistance towards bacterial and fungal pathogens, independent of salicylic acid, ethylene and j…	PF03552
At2g41610	32	21	10.9	19.4207	unknown protein; FUNCTIONS IN: molecular_function unknown; INVOLVED IN: biological_process unknown; LOCATED IN: cellular_component unknown; EXPRESSED IN: 8 plant structures; EXPRESSED DURING: 4 anthesis, petal differentiation and expansion stage; Has 18 Blast hits to 18 proteins in 5 species: Archae - 0; Bacteria - 0; Metazoa - 0; Fungi - 0; Plants - 18; Viruses - 0; Other Eukaryotes - 0 (source:…	.
At1g19170	6	41	32	19.8928	glycoside hydrolase family 28 protein / polygalacturonase (pectinase) family protein; FUNCTIONS IN: polygalacturonase activity; INVOLVED IN: carbohydrate metabolic process; LOCATED IN: mitochondrion; EXPRESSED IN: 22 plant structures; EXPRESSED DURING: 13 growth stages; CONTAINS InterPro DOMAIN/s: Pectin lyase fold/virulence factor (InterPro:IPR011050), Glycoside hydrolase, family 28 (InterPro:IP…	PF00295
At3g16920	44.7	11.2	18.5	21.0006	CHITINASE-LIKE PROTEIN 2 (CTL2) Encodes a chitinase-like protein expressed predominantly in stems. Mutants accumulate ligning in etiolated hypocotyls.	PF00182
At5g44030	46	11.9	17.5	21.238	CELLULOSE SYNTHASE A4 (CESA4) Encodes a cellulose synthase involved in secondary cell wall biosynthesis. Confers resistance towards bacterial and fungal pathogens, independent of salicylic acid, ethylene and jasmonate signaling.	PF03552
At5g03170	58.1	13.4	13.4	21.8505	FASCICLIN-LIKE ARABINOGALACTAN-PROTEIN 11 (FLA11) FLA11; LOCATED IN: anchored to membrane; EXPRESSED IN: 20 plant structures; EXPRESSED DURING: 13 growth stages; CONTAINS InterPro DOMAIN/s: FAS1 domain (InterPro:IPR000782); BEST Arabidopsis thaliana protein match is: FLA12 (TAIR:AT5G60490.1); Has 653 Blast hits to 643 proteins in 116 species: Archae - 10; Bacteria - 167; Metazoa - 17; Fungi - 10;…	PF02469
At5g60720	48.6	12	19.9	22.6407	unknown protein; FUNCTIONS IN: molecular_function unknown; INVOLVED IN: biological_process unknown; LOCATED IN: chloroplast; EXPRESSED IN: 18 plant structures; EXPRESSED DURING: 7 growth stages; CONTAINS InterPro DOMAIN/s: Protein of unknown function DUF547 (InterPro:IPR006869); BEST Arabidopsis thaliana protein match is: unknown protein (TAIR:AT2G39690.1); Has 447 Blast hits to 420 proteins in 7…	PF04784
At4g17220	59	8.9	22.5	22.7759	MICROTUBULE-ASSOCIATED PROTEINS 70-5 (ATMAP70-5) Encodes a microtubule associated protein (MAP70-5). Expressed in all tissues.	PF07058
At5g54690	37.7	14.3	23	23.1456	GALACTURONOSYLTRANSFERASE 12 (GAUT12) Encodes a protein with putative galacturonosyltransferase activity. Mutants defective in this gene displayed a notable reduction in xylose (>50%) in the cell walls from stems and roots and a reduction in cellulose (~25%).	PF01501
At1g09610	47	22.4	13	23.9201	unknown protein; FUNCTIONS IN: molecular_function unknown; INVOLVED IN: biological_process unknown; LOCATED IN: endomembrane system; EXPRESSED IN: 6 plant structures; EXPRESSED DURING: 4 anthesis, petal differentiation and expansion stage; CONTAINS InterPro DOMAIN/s: Protein of unknown function DUF579, plant (InterPro:IPR006514); BEST Arabidopsis thaliana protein match is: unknown protein (TAIR:A…	PF04669
At5g46340	35.3	23	17.4	24.1741	O-acetyltransferase-related; FUNCTIONS IN: molecular_function unknown; INVOLVED IN: biological_process unknown; LOCATED IN: cellular_component unknown; EXPRESSED IN: 23 plant structures; EXPRESSED DURING: 13 growth stages; CONTAINS InterPro DOMAIN/s: Cas1p-like (InterPro:IPR012419); BEST Arabidopsis thaliana protein match is: O-acetyltransferase family protein (TAIR:AT2G34410.2); Has 186 Blast hi…	PF07779
At4g27435	53.3	11.4	25	24.7661	unknown protein; FUNCTIONS IN: molecular_function unknown; INVOLVED IN: biological_process unknown; LOCATED IN: endomembrane system; EXPRESSED IN: 23 plant structures; EXPRESSED DURING: 13 growth stages; CONTAINS InterPro DOMAIN/s: Protein of unknown function DUF1218 (InterPro:IPR009606); BEST Arabidopsis thaliana protein match is: unknown protein (TAIR:AT3G15480.1); Has 159 Blast hits to 159 pro…	PF06749
At1g32770	31.7	30.4	17.1	25.4474	ARABIDOPSIS NAC DOMAIN CONTAINING PROTEIN 12 (ANAC012) Encodes SND1, a NAC Domain transcription factor involved in secondary wall biosynthesis in fibers. Expressed specifically in interfascicular fibers and xylary fibers in stems. Expressed in the procambium of stem inflorescences and root. May act as a negative regulator of secondary wall thickening in xylary fibers. Acts redundantly with NST1 t…	PF02365
At4g28500	73.5	13.8	16.4	25.5272	ARABIDOPSIS NAC DOMAIN CONTAINING PROTEIN 73 (anac073) ARABIDOPSIS NAC DOMAIN CONTAINING PROTEIN 73 (ANAC073); FUNCTIONS IN: transcription factor activity, transcription activator activity; INVOLVED IN: multicellular organismal development, regulation of secondary cell wall thickening; LOCATED IN: nucleus; EXPRESSED IN: 9 plant structures; EXPRESSED DURING: 4 anthesis, petal differentiation and e…	PF02365
At2g31930	46.2	29.4	13	26.0402	unknown protein; FUNCTIONS IN: molecular_function unknown; INVOLVED IN: biological_process unknown; LOCATED IN: cellular_component unknown; EXPRESSED IN: inflorescence meristem, flower, root; EXPRESSED DURING: petal differentiation and expansion stage; Has 4 Blast hits to 4 proteins in 2 species: Archae - 0; Bacteria - 0; Metazoa - 0; Fungi - 0; Plants - 4; Viruses - 0; Other Eukaryotes - 0 (sour…	.
At1g33800	37.2	12.8	38.2	26.299	unknown protein; FUNCTIONS IN: molecular_function unknown; INVOLVED IN: biological_process unknown; LOCATED IN: endomembrane system; EXPRESSED IN: 20 plant structures; EXPRESSED DURING: 12 growth stages; CONTAINS InterPro DOMAIN/s: Protein of unknown function DUF579, plant (InterPro:IPR006514); BEST Arabidopsis thaliana protein match is: unknown protein (TAIR:AT4G09990.1); Has 160 Blast hits to 1…	PF04669
At1g09440	24.1	38.5	21.2	26.9942	protein kinase family protein; FUNCTIONS IN: protein serine/threonine kinase activity, protein tyrosine kinase activity, protein kinase activity, kinase activity, ATP binding; INVOLVED IN: protein amino acid phosphorylation; LOCATED IN: endomembrane system; EXPRESSED IN: 11 plant structures; EXPRESSED DURING: 6 growth stages; CONTAINS InterPro DOMAIN/s: Protein kinase, ATP binding site (InterPro:…	PF00069
At5g01360	54.6	14.4	26.5	27.517	TRICHOME BIREFRINGENCE-LIKE 3 (TBL3) EXPRESSED IN: 13 plant structures; EXPRESSED DURING: 4 anthesis, petal differentiation and expansion stage; CONTAINS InterPro DOMAIN/s: Protein of unknown function DUF231, plant (InterPro:IPR004253); BEST Arabidopsis thaliana protein match is: ESK1 (ESKIMO 1) (TAIR:AT3G55990.1); Has 688 Blast hits to 680 proteins in 18 species: Archae - 0; Bacteria - 0; Metazo…	PF03005
At2g20650	40.8	36.2	15.7	28.5161	zinc finger (C3HC4-type RING finger) family protein; FUNCTIONS IN: protein binding, zinc ion binding; LOCATED IN: endomembrane system; EXPRESSED IN: 22 plant structures; EXPRESSED DURING: 13 growth stages; CONTAINS InterPro DOMAIN/s: Zinc finger, RING-type (InterPro:IPR001841), Zinc finger, RING/FYVE/PHD-type (InterPro:IPR013083); BEST Arabidopsis thaliana protein match is: protein binding / zinc…	PF00097
At2g29130	86	21.8	15.5	30.7441	LACCASE 2 (LAC2) putative laccase, knockout mutant had reduced root elongation under PEG-induced dehydration	PF07731,PF07732,PF00394
At2g38080	65.5	17.9	26.4	31.3978	IRREGULAR XYLEM 12 (IRX12) Encodes a protein with similarity to putative laccase, a member of laccase family (17 members in Arabidopsis). Might be involved in cell wall biosynthesis. Mutants have a mild irregular xylem phenotype.	PF07731,PF00394,PF07732
At5g01190	72.6	26.7	16.2	31.5491	LACCASE 10 (LAC10) putative laccase, a member of laccase family of genes (17 members in Arabidopsis).	PF07731,PF00394,PF07732
At1g22480	53.2	32	19.4	32.0839	plastocyanin-like domain-containing protein; FUNCTIONS IN: electron carrier activity, copper ion binding; LOCATED IN: anchored to membrane; EXPRESSED IN: shoot apex, embryo, inflorescence meristem, flower, seed; EXPRESSED DURING: F mature embryo stage, petal differentiation and expansion stage, D bilateral stage, E expanded cotyledon stage; CONTAINS InterPro DOMAIN/s: Plastocyanin-like (InterPro:…	PF02298
At1g08340	114.5	14.5	25.3	34.7615	rac GTPase activating protein, putative; FUNCTIONS IN: Rac GTPase activator activity; INVOLVED IN: signal transduction; LOCATED IN: intracellular; EXPRESSED IN: 23 plant structures; EXPRESSED DURING: 13 growth stages; CONTAINS InterPro DOMAIN/s: PAK-box/P21-Rho-binding (InterPro:IPR000095), Rho GTPase activation protein (InterPro:IPR008936), RhoGAP (InterPro:IPR000198); BEST Arabidopsis thaliana …	PF00786,PF00620
At1g27920	53.4	31.7	26.3	35.442	MICROTUBULE-ASSOCIATED PROTEIN 65-8 (MAP65-8) MICROTUBULE-ASSOCIATED PROTEIN 65-8 (MAP65-8); FUNCTIONS IN: molecular_function unknown; INVOLVED IN: biological_process unknown; LOCATED IN: microtubule, spindle, phragmoplast; EXPRESSED IN: 20 plant structures; EXPRESSED DURING: 9 growth stages; CONTAINS InterPro DOMAIN/s: MAP65/ASE1 (InterPro:IPR007145); BEST Arabidopsis thaliana protein match is: …	PF03999
At3g62020	98.8	20.2	23.4	36.0115	GERMIN-LIKE PROTEIN 10 (GLP10) germin-like protein (GLP10)	PF00190
At1g24030	114.4	14.2	29.1	36.1578	protein kinase family protein; FUNCTIONS IN: protein serine/threonine kinase activity, protein tyrosine kinase activity, protein kinase activity, kinase activity, ATP binding; INVOLVED IN: protein amino acid phosphorylation; EXPRESSED IN: 12 plant structures; EXPRESSED DURING: 4 anthesis, petal differentiation and expansion stage; CONTAINS InterPro DOMAIN/s: Protein kinase, ATP binding site (Inte…	PF00069
At5g45970	92.6	28.6	20.8	38.0493	ARABIDOPSIS RAC-LIKE 2 (ARAC2) Encodes a Rac-like protein ARAC2. A member of ROP GTPase gene family.	PF00071
At5g59290	53.2	39.1	31.7	40.4001	UDP-GLUCURONIC ACID DECARBOXYLASE 3 (UXS3) Encodes an isoform of UDP-glucuronic acid decarboxylase, which is predicted to be cytosolic by PSORT. This enzyme produces UDP-xylose, which is a substrate for many cell wall carbohydrates including hemicellulose and pectin. UDP-xylose is also known to feedback regulate several cell wall biosynthetic enzymes.	PF01370
At2g43660	89.5	19.2	43.9	42.2535	glycosyl hydrolase family protein 17; FUNCTIONS IN: molecular_function unknown; INVOLVED IN: biological_process unknown; LOCATED IN: endomembrane system; EXPRESSED IN: inflorescence meristem, hypocotyl, flower, root; EXPRESSED DURING: petal differentiation and expansion stage; CONTAINS InterPro DOMAIN/s: X8 (InterPro:IPR012946); BEST Arabidopsis thaliana protein match is: glycosyl hydrolase famil…	PF07983
At1g80170	55.3	86.6	15.9	42.3851	polygalacturonase, putative / pectinase, putative; FUNCTIONS IN: polygalacturonase activity; INVOLVED IN: carbohydrate metabolic process; LOCATED IN: plant-type cell wall; EXPRESSED IN: 15 plant structures; EXPRESSED DURING: 6 growth stages; CONTAINS InterPro DOMAIN/s: Pectin lyase fold/virulence factor (InterPro:IPR011050), Pectin lyase fold (InterPro:IPR012334), Glycoside hydrolase, family 28 (…	PF00295
At5g60490	74	50.4	26.8	46.4087	FASCICLIN-LIKE ARABINOGALACTAN-PROTEIN 12 (FLA12) FLA12; LOCATED IN: plasma membrane, anchored to membrane; EXPRESSED IN: 22 plant structures; EXPRESSED DURING: 13 growth stages; CONTAINS InterPro DOMAIN/s: FAS1 domain (InterPro:IPR000782); BEST Arabidopsis thaliana protein match is: FLA11 (TAIR:AT5G03170.1); Has 973 Blast hits to 947 proteins in 200 species: Archae - 18; Bacteria - 347; Metazoa …	PF02469
At1g78815	116.3	22.5	40.8	47.4396	LIGHT SENSITIVE HYPOCOTYLS 7 (LSH7) LIGHT SENSITIVE HYPOCOTYLS 7 (LSH7); FUNCTIONS IN: molecular_function unknown; INVOLVED IN: biological_process unknown; LOCATED IN: chloroplast; EXPRESSED IN: inflorescence meristem, hypocotyl, flower, root; EXPRESSED DURING: petal differentiation and expansion stage; CONTAINS InterPro DOMAIN/s: Protein of unknown function DUF640 (InterPro:IPR006936); BEST Arab…	PF04852
At5g42180	107.8	17.2	58.5	47.6908	peroxidase 64 (PER64) (P64) (PRXR4); FUNCTIONS IN: electron carrier activity, peroxidase activity, heme binding; INVOLVED IN: response to oxidative stress; LOCATED IN: plant-type cell wall; EXPRESSED IN: 10 plant structures; EXPRESSED DURING: 4 anthesis, C globular stage, petal differentiation and expansion stage; CONTAINS InterPro DOMAIN/s: Haem peroxidase (InterPro:IPR010255), Plant peroxidase …	PF00141
At5g05390	152	32.2	24.4	49.2451	LACCASE 12 (LAC12) putative laccase, a member of laccase family of genes (17 members in Arabidopsis).	PF07731,PF00394,PF07732
At2g28760	75.9	32	52.8	50.4284	UDP-XYL SYNTHASE 6 (UXS6) UDP-XYL SYNTHASE 6 (UXS6); FUNCTIONS IN: coenzyme binding, binding, catalytic activity; INVOLVED IN: cellular metabolic process, nucleotide-sugar metabolic process, metabolic process; LOCATED IN: plasma membrane; EXPRESSED IN: 24 plant structures; EXPRESSED DURING: 13 growth stages; CONTAINS InterPro DOMAIN/s: NAD-dependent epimerase/dehydratase (InterPro:IPR001509), NAD…	PF01370
At3g59690	73.5	43.1	46.6	52.8506	calmodulin-binding family protein, similar to SF16 protein (Helianthus annuus) GI:560150; contains Pfam profile PF00612: IQ calmodulin-binding motif	PF00612,PF03832
At5g67210	124.5	26.2	50.5	54.8177	unknown protein; FUNCTIONS IN: molecular_function unknown; INVOLVED IN: biological_process unknown; LOCATED IN: cellular_component unknown; EXPRESSED IN: 20 plant structures; EXPRESSED DURING: 13 growth stages; CONTAINS InterPro DOMAIN/s: Protein of unknown function DUF579, plant (InterPro:IPR006514); BEST Arabidopsis thaliana protein match is: unknown protein (TAIR:AT3G50220.1); Has 161 Blast hi…	PF04669
At1g67510	57.3	163.3	20.1	57.2944	leucine-rich repeat family protein; FUNCTIONS IN: protein serine/threonine kinase activity, kinase activity, ATP binding; INVOLVED IN: transmembrane receptor protein tyrosine kinase signaling pathway, protein amino acid phosphorylation; LOCATED IN: endomembrane system; EXPRESSED IN: 22 plant structures; EXPRESSED DURING: 13 growth stages; CONTAINS InterPro DOMAIN/s: Protein kinase, core (InterPro…	PF00560,PF08263,PF00069
At5g48560	96.8	37.2	57.7	59.2286	basic helix-loop-helix (bHLH) family protein; FUNCTIONS IN: transcription factor activity, DNA binding; INVOLVED IN: regulation of transcription; LOCATED IN: nucleus; EXPRESSED IN: 14 plant structures; EXPRESSED DURING: LP.06 six leaves visible, 4 anthesis, LP.04 four leaves visible, petal differentiation and expansion stage, LP.08 eight leaves visible; CONTAINS InterPro DOMAIN/s: Basic helix-loo…	PF00010
At1g72220	323.8	12.7	51.4	59.5682	zinc finger (C3HC4-type RING finger) family protein; FUNCTIONS IN: protein binding, zinc ion binding; EXPRESSED IN: inflorescence meristem, flower, root; EXPRESSED DURING: 4 anthesis, petal differentiation and expansion stage; CONTAINS InterPro DOMAIN/s: Zinc finger, RING-type, conserved site (InterPro:IPR017907), Zinc finger, RING-type (InterPro:IPR001841), Zinc finger, RING/FYVE/PHD-type (Inter…	PF00097
At1g58160	177.8	12.6	97	60.1208	jacalin lectin family protein; FUNCTIONS IN: molecular_function unknown; INVOLVED IN: biological_process unknown; LOCATED IN: cellular_component unknown; EXPRESSED IN: 18 plant structures; EXPRESSED DURING: 9 growth stages; CONTAINS InterPro DOMAIN/s: Mannose-binding lectin (InterPro:IPR001229); BEST Arabidopsis thaliana protein match is: unknown protein (TAIR:AT1G60110.1); Has 517 Blast hits to …	PF01419
At1g73640	161.1	54.3	25.2	60.4086	ARABIDOPSIS RAB GTPASE HOMOLOG A6A (AtRABA6a) Arabidopsis Rab GTPase homolog A6a (AtRABA6a); FUNCTIONS IN: GTP binding; INVOLVED IN: protein transport, small GTPase mediated signal transduction; LOCATED IN: plasma membrane; EXPRESSED IN: 22 plant structures; EXPRESSED DURING: 13 growth stages; CONTAINS InterPro DOMAIN/s: Ras GTPase (InterPro:IPR001806), Small GTP-binding protein (InterPro:IPR0052…	PF00071
At1g31720	122.4	50.8	35.5	60.4354	unknown protein; FUNCTIONS IN: molecular_function unknown; INVOLVED IN: biological_process unknown; LOCATED IN: cellular_component unknown; EXPRESSED IN: leaf whorl, petal, inflorescence meristem, flower; EXPRESSED DURING: 4 anthesis, petal differentiation and expansion stage; CONTAINS InterPro DOMAIN/s: Protein of unknown function DUF1218 (InterPro:IPR009606); BEST Arabidopsis thaliana protein m…	PF06749
At5g60020	197.3	31.1	36.9	60.9497	LACCASE 17 (LAC17) putative laccase, a member of laccase family of genes (17 members in Arabidopsis).	PF07731,PF00394,PF07732
At1g79620	103.7	58.9	37.7	61.2931	leucine-rich repeat transmembrane protein kinase, putative; FUNCTIONS IN: protein serine/threonine kinase activity, kinase activity, ATP binding; INVOLVED IN: transmembrane receptor protein tyrosine kinase signaling pathway, protein amino acid phosphorylation; LOCATED IN: endomembrane system; EXPRESSED IN: 8 plant structures; EXPRESSED DURING: 4 anthesis, petal differentiation and expansion stage…	PF00560,PF08263,PF00069
At2g03200	349.6	11.8	75	67.635	aspartyl protease family protein; FUNCTIONS IN: aspartic-type endopeptidase activity; INVOLVED IN: proteolysis; LOCATED IN: endomembrane system; EXPRESSED IN: 10 plant structures; EXPRESSED DURING: 4 anthesis, C globular stage, petal differentiation and expansion stage; CONTAINS InterPro DOMAIN/s: Peptidase aspartic, catalytic (InterPro:IPR009007), Peptidase A1 (InterPro:IPR001461); BEST Arabidop…	PF00026
At5g14510	149.3	69.6	30.8	68.4027	armadillo/beta-catenin repeat family protein; FUNCTIONS IN: binding; INVOLVED IN: biological_process unknown; LOCATED IN: cellular_component unknown; EXPRESSED IN: 18 plant structures; EXPRESSED DURING: 11 growth stages; CONTAINS InterPro DOMAIN/s: Armadillo-like helical (InterPro:IPR011989), Armadillo (InterPro:IPR000225), Armadillo-type fold (InterPro:IPR016024); BEST Arabidopsis thaliana prote…	PF00514
At1g16490	202.1	25.8	61.7	68.521	MYB DOMAIN PROTEIN 58 (MYB58) Member of the R2R3 factor gene family.	PF00249
At5g40020	203.7	49.9	35.8	71.3934	pathogenesis-related thaumatin family protein; FUNCTIONS IN: molecular_function unknown; INVOLVED IN: response to other organism; LOCATED IN: endomembrane system; EXPRESSED IN: 13 plant structures; EXPRESSED DURING: 6 growth stages; CONTAINS InterPro DOMAIN/s: Thaumatin, pathogenesis-related (InterPro:IPR001938); BEST Arabidopsis thaliana protein match is: ATLP-1 (TAIR:AT1G18250.1); Has 1031 Blas…	PF00314
At1g62990	231.8	12.1	132.2	71.8417	KNOTTED-LIKE HOMEOBOX OF ARABIDOPSIS THALIANA 7 (KNAT7) Encodes a homeodomain transcription factor of the Knotted family. May be involved in secondary cell wall biosynthesis. Mutants have moderately irregular xylem development. Expression of this gene is upregulated by SND1 and MYB46.	PF03791,PF03790,PF03789
At5g63580	110.7	72.3	48.8	73.0974	FLAVONOL SYNTHASE 2 (FLS2) encodes a protein whose sequence is similar to flavonol synthase	PF03171
At3g49880	210.8	100.3	21.6	77.009	glycosyl hydrolase family protein 43; FUNCTIONS IN: hydrolase activity, hydrolyzing O-glycosyl compounds; INVOLVED IN: carbohydrate metabolic process; LOCATED IN: cellular_component unknown; EXPRESSED IN: 21 plant structures; EXPRESSED DURING: 12 growth stages; CONTAINS InterPro DOMAIN/s: Glycoside hydrolase, family 43 (InterPro:IPR006710); BEST Arabidopsis thaliana protein match is: glycosyl hyd…	PF04616
At2g44745	141.8	96.8	34.2	77.7188	WRKY family transcription factor; FUNCTIONS IN: transcription factor activity; INVOLVED IN: regulation of transcription, DNA-dependent; LOCATED IN: nucleus; EXPRESSED IN: 8 plant structures; EXPRESSED DURING: 4 anthesis, petal differentiation and expansion stage, D bilateral stage, E expanded cotyledon stage; CONTAINS InterPro DOMAIN/s: DNA-binding WRKY (InterPro:IPR003657); BEST Arabidopsis thal…	PF03106
At4g23496	145.9	91.6	36.1	78.4307	SPIRAL1-LIKE5 (SP1L5) Belongs to a six-member gene family in Arabidopsis; all members share high sequence similarity in amino- and carboxy-terminal regions. Regulates cortical microtubule organization. Mutant plants exhibit altered patterns of root, leaf and petal growth as a result of defective anisotropic cell expansion.	.
At1g72230	108.8	33.8	132	78.5911	plastocyanin-like domain-containing protein; FUNCTIONS IN: electron carrier activity, copper ion binding; LOCATED IN: anchored to membrane; EXPRESSED IN: 17 plant structures; EXPRESSED DURING: 9 growth stages; CONTAINS InterPro DOMAIN/s: Plastocyanin-like (InterPro:IPR003245), Cupredoxin (InterPro:IPR008972), Blue (type 1) copper domain (InterPro:IPR000923); BEST Arabidopsis thaliana protein matc…	PF02298
At1g32100	262.1	39.5	48.3	79.3726	PINORESINOL REDUCTASE 1 (PRR1) Encodes a pinoresinol reductase involved in lignan biosynthesis. Expressed strongly in roots and less strongly in stems. Shows specificity for pinoresinol and not lariciresinol.	PF05368
At1g74660	221.8	48.4	51	81.8074	MINI ZINC FINGER 1 (MIF1) Constitutive overexpression of MIF1 caused dramatic developmental defects, seedlings were non-responsive to gibberellin (GA) for cell elongation, hypersensitive to the GA synthesis inhibitor paclobutrazol (PAC) and abscisic acid (ABA), and hyposensitive to auxin, brassinosteroid and cytokinin, but normally responsive to ethylene.	PF04770
At2g04850	100.6	85.5	68.2	83.7111	auxin-responsive protein-related; LOCATED IN: membrane; EXPRESSED IN: 21 plant structures; EXPRESSED DURING: 13 growth stages; CONTAINS InterPro DOMAIN/s: Uncharacterised conserved protein UCP037471 (InterPro:IPR017214), Protein of unknown function DUF568, DOMON-like (InterPro:IPR007613), DOMON related (InterPro:IPR005018), Cytochrome b561/ferric reductase transmembrane (InterPro:IPR006593); BEST…	PF04526
At4g22680	280.9	62.5	35	85.0159	MYB DOMAIN PROTEIN 85 (MYB85) Encodes a putative transcription factor (MYB85).	PF00249
At1g79180	221.1	43.2	65.3	85.4401	MYB DOMAIN PROTEIN 63 (MYB63) Member of the R2R3 factor gene family.	PF00249
At3g61380	321.3	10.9	183.8	86.3431	unknown protein; FUNCTIONS IN: molecular_function unknown; INVOLVED IN: biological_process unknown; LOCATED IN: plasma membrane; EXPRESSED IN: 23 plant structures; EXPRESSED DURING: 14 growth stages; BEST Arabidopsis thaliana protein match is: unknown protein (TAIR:AT2G45900.1); Has 857 Blast hits to 717 proteins in 165 species: Archae - 0; Bacteria - 60; Metazoa - 255; Fungi - 95; Plants - 97; V…	.
At4g30110	123.1	61.6	89.5	87.8794	HEAVY METAL ATPASE 2 (HMA2) encodes a protein similar to Zn-ATPase, a P1B-type ATPases transport zinc	PF00702,PF00122
At1g14390	195.5	70.4	56.3	91.8493	leucine-rich repeat transmembrane protein kinase, putative; FUNCTIONS IN: protein binding, protein serine/threonine kinase activity, protein tyrosine kinase activity, protein kinase activity, ATP binding; INVOLVED IN: transmembrane receptor protein tyrosine kinase signaling pathway, protein amino acid phosphorylation; LOCATED IN: endomembrane system; EXPRESSED IN: inflorescence meristem, flower, …	PF00560,PF07714
At5g61340	299.9	27.1	100.7	93.5388	unknown protein; FUNCTIONS IN: molecular_function unknown; INVOLVED IN: biological_process unknown; EXPRESSED IN: 17 plant structures; EXPRESSED DURING: LP.06 six leaves visible, 4 anthesis, LP.04 four leaves visible, 4 leaf senescence stage, petal differentiation and expansion stage; BEST Arabidopsis thaliana protein match is: unknown protein (TAIR:AT1G26650.1); Has 39 Blast hits to 39 proteins …	.
At2g17940	313.8	48.2	60.2	96.9242	unknown protein; FUNCTIONS IN: molecular_function unknown; INVOLVED IN: biological_process unknown; LOCATED IN: cellular_component unknown; EXPRESSED IN: inflorescence meristem, flower; EXPRESSED DURING: 4 anthesis, petal differentiation and expansion stage; CONTAINS InterPro DOMAIN/s: Protein of unknown function DUF827, plant (InterPro:IPR008545); Has 47 Blast hits to 39 proteins in 14 species: …	PF05701
At1g68200	285.8	108.2	29.6	97.0943	zinc finger (CCCH-type) family protein; FUNCTIONS IN: transcription factor activity, nucleic acid binding; INVOLVED IN: regulation of transcription; EXPRESSED IN: inflorescence meristem, flower; EXPRESSED DURING: petal differentiation and expansion stage; CONTAINS InterPro DOMAIN/s: Zinc finger, CCCH-type (InterPro:IPR000571); BEST Arabidopsis thaliana protein match is: zinc finger (CCCH-type) fa…	PF00642
At5g38010	137.7	97.1	70	97.8176	transferase, transferring hexosyl groups; FUNCTIONS IN: transferase activity, transferring hexosyl groups; INVOLVED IN: metabolic process; CONTAINS InterPro DOMAIN/s: UDP-glucuronosyl/UDP-glucosyltransferase (InterPro:IPR002213); BEST Arabidopsis thaliana protein match is: UDP-glucoronosyl/UDP-glucosyl transferase family protein (TAIR:AT5G38010.1); Has 3240 Blast hits to 3231 proteins in 209 spec…	PF00201
At2g03450	184.2	83	68.9	101.749	PURPLE ACID PHOSPHATASE 9 (PAP9) PURPLE ACID PHOSPHATASE 9 (PAP9); FUNCTIONS IN: protein serine/threonine phosphatase activity, acid phosphatase activity; INVOLVED IN: biological_process unknown; LOCATED IN: endomembrane system; EXPRESSED IN: 24 plant structures; EXPRESSED DURING: 13 growth stages; CONTAINS InterPro DOMAIN/s: Purple acid phosphatase, N-terminal (InterPro:IPR015914), Metallophosph…	PF00149
At3g19370	70.2	96.1	165	103.637	LOCATED IN: plasma membrane; EXPRESSED IN: 22 plant structures; EXPRESSED DURING: 13 growth stages; CONTAINS InterPro DOMAIN/s: Protein of unknown function DUF869, plant (InterPro:IPR008587); BEST Arabidopsis thaliana protein match is: transport protein-related (TAIR:AT2G23360.1); Has 35914 Blast hits to 20425 proteins in 933 species: Archae - 357; Bacteria - 2527; Metazoa - 19254; Fungi - 2459; …	PF05911
At4g08160	249.2	77.4	59.5	104.697	Encodes a putative glycosyl hydrolase family 10 protein (xylanase).	PF02018,PF00331
At1g14380	59.6	120.2	167.9	106.349	IQ67 DOMAIN PROTEIN 28 (IQD28) IQ67 DOMAIN PROTEIN 28 (IQD28); FUNCTIONS IN: calmodulin binding; INVOLVED IN: biological_process unknown; LOCATED IN: plasma membrane; EXPRESSED IN: 22 plant structures; EXPRESSED DURING: 13 growth stages; CONTAINS InterPro DOMAIN/s: IQ calmodulin-binding region (InterPro:IPR000048); BEST Arabidopsis thaliana protein match is: IQD29 (IQ-domain 29); calmodulin bindi…	PF00612
At1g47485	130.6	141.6	66.5	107.138	Encodes CEP1, a 15-amino-acid peptide, which is mainly expressed in the lateral root primordia. When overexpressed or externally applied, CEP1 arrests root growth. CEP1 is a candidate for a novel peptide plant hormone.	.
At1g66810	301.9	105.2	39.5	107.851	zinc finger (CCCH-type) family protein; FUNCTIONS IN: zinc ion binding, nucleic acid binding; INVOLVED IN: biological_process unknown; EXPRESSED IN: 20 plant structures; EXPRESSED DURING: 13 growth stages; CONTAINS InterPro DOMAIN/s: Zinc finger, CCCH-type (InterPro:IPR000571); BEST Arabidopsis thaliana protein match is: zinc finger (CCCH-type) family protein (TAIR:AT1G68200.2); Has 729 Blast hit…	PF00642
At1g47410	312.4	55.3	73.1	108.09	unknown protein; FUNCTIONS IN: molecular_function unknown; INVOLVED IN: biological_process unknown; LOCATED IN: cellular_component unknown; EXPRESSED IN: 22 plant structures; EXPRESSED DURING: 14 growth stages; Has 11 Blast hits to 11 proteins in 4 species: Archae - 0; Bacteria - 0; Metazoa - 0; Fungi - 0; Plants - 11; Viruses - 0; Other Eukaryotes - 0 (source: NCBI BLink).	.
At3g21710	261.5	37.9	129.3	108.618	unknown protein; FUNCTIONS IN: molecular_function unknown; INVOLVED IN: biological_process unknown; LOCATED IN: cellular_component unknown; EXPRESSED IN: 9 plant structures; EXPRESSED DURING: 4 anthesis, C globular stage, petal differentiation and expansion stage; Has 16 Blast hits to 16 proteins in 6 species: Archae - 0; Bacteria - 0; Metazoa - 0; Fungi - 0; Plants - 16; Viruses - 0; Other Eukar…	.
At2g33990	69	97.8	196.7	109.9	IQ-DOMAIN 9 (iqd9) IQ-domain 9 (iqd9); FUNCTIONS IN: calmodulin binding; INVOLVED IN: biological_process unknown; LOCATED IN: plasma membrane; EXPRESSED IN: 22 plant structures; EXPRESSED DURING: 13 growth stages; CONTAINS InterPro DOMAIN/s: IQ calmodulin-binding region (InterPro:IPR000048); BEST Arabidopsis thaliana protein match is: IQD10 (IQ-domain 10); calmodulin binding (TAIR:AT3G15050.1); H…	PF00612
At5g48740	225.5	92.8	64.6	110.571	leucine-rich repeat family protein / protein kinase family protein; FUNCTIONS IN: kinase activity; INVOLVED IN: protein amino acid phosphorylation; LOCATED IN: endomembrane system; EXPRESSED IN: 10 plant structures; EXPRESSED DURING: 4 anthesis, LP.04 four leaves visible, petal differentiation and expansion stage; CONTAINS InterPro DOMAIN/s: Protein kinase, ATP binding site (InterPro:IPR017441), …	PF00560,PF00069
At5g59305	107	229.2	56	111.155	unknown protein; FUNCTIONS IN: molecular_function unknown; INVOLVED IN: biological_process unknown; LOCATED IN: endomembrane system; EXPRESSED IN: 8 plant structures; EXPRESSED DURING: F mature embryo stage, petal differentiation and expansion stage, D bilateral stage, E expanded cotyledon stage; Has 6 Blast hits to 6 proteins in 2 species: Archae - 0; Bacteria - 0; Metazoa - 0; Fungi - 0; Plants…	.
At2g31900	280.2	98.1	53	113.363	MYOSIN-LIKE PROTEIN XIF (XIF) Encodes an novel myosin isoform.	PF02736,PF00063,PF00612,PF01843
At4g09990	242.7	83.2	81	117.822	unknown protein; FUNCTIONS IN: molecular_function unknown; INVOLVED IN: biological_process unknown; LOCATED IN: endomembrane system; EXPRESSED IN: 9 plant structures; EXPRESSED DURING: 4 anthesis, LP.10 ten leaves visible, petal differentiation and expansion stage; CONTAINS InterPro DOMAIN/s: Protein of unknown function DUF579, plant (InterPro:IPR006514); BEST Arabidopsis thaliana protein match i…	PF04669
At5g46115	221.1	98.7	75.4	118.057	unknown protein; FUNCTIONS IN: molecular_function unknown; INVOLVED IN: biological_process unknown; LOCATED IN: cellular_component unknown; EXPRESSED IN: 7 plant structures; EXPRESSED DURING: 4 anthesis, C globular stage, petal differentiation and expansion stage; Has 2 Blast hits to 2 proteins in 1 species: Archae - 0; Bacteria - 0; Metazoa - 0; Fungi - 0; Plants - 2; Viruses - 0; Other Eukaryot…	.
At5g15490	273.5	38.6	158.5	118.72	UDP-glucose 6-dehydrogenase, putative; FUNCTIONS IN: in 7 functions; INVOLVED IN: metabolic process; LOCATED IN: cytosol, cell wall, nucleus; EXPRESSED IN: 24 plant structures; EXPRESSED DURING: 13 growth stages; CONTAINS InterPro DOMAIN/s: UDP-glucose/GDP-mannose dehydrogenase, N-terminal (InterPro:IPR001732), 6-phosphogluconate dehydrogenase, C-terminal-like (InterPro:IPR008927), Dehydrogenase,…	PF00984,PF03720,PF03721
At5g65040	313.3	119.3	47	120.661	senescence-associated protein-related; FUNCTIONS IN: molecular_function unknown; INVOLVED IN: biological_process unknown; LOCATED IN: cellular_component unknown; EXPRESSED IN: 19 plant structures; EXPRESSED DURING: 7 growth stages; CONTAINS InterPro DOMAIN/s: Protein of unknown function DUF581 (InterPro:IPR007650); BEST Arabidopsis thaliana protein match is: senescence-associated protein-related …	PF04570
At3g59845	229.6	108.1	71.3	120.956	NADP-dependent oxidoreductase, putative; FUNCTIONS IN: oxidoreductase activity, binding, catalytic activity, zinc ion binding; INVOLVED IN: response to oxidative stress; EXPRESSED IN: 8 plant structures; EXPRESSED DURING: 4 anthesis, C globular stage, petal differentiation and expansion stage, D bilateral stage, E expanded cotyledon stage; CONTAINS InterPro DOMAIN/s: GroES-like (InterPro:IPR01103…	PF00107
At5g58980	305.1	85.3	108.9	141.516	ceramidase family protein; FUNCTIONS IN: ceramidase activity; INVOLVED IN: biological_process unknown; LOCATED IN: endomembrane system; EXPRESSED IN: 22 plant structures; EXPRESSED DURING: 13 growth stages; CONTAINS InterPro DOMAIN/s: Neutral/alkaline nonlysosomal ceramidase (InterPro:IPR006823); BEST Arabidopsis thaliana protein match is: ceramidase family protein (TAIR:AT1G07380.1); Has 382 Bla…	PF04734
At1g30840	282.7	48	256.2	151.489	ARABIDOPSIS THALIANA PURINE PERMEASE 4 (ATPUP4) Member of a family of proteins related to PUP1, a purine transporter. May be involved in the transport of purine and purine derivatives such as cytokinins, across the plasma membrane.	PF03151,PF00892
At1g02500	98.4	216.7	169.1	153.344	S-ADENOSYLMETHIONINE SYNTHETASE 1 (SAM1) encodes a S-adenosylmethionine synthetase. SAM1 is regulated by protein S-nitrosylation. The covalent binding of nitric oxide (NO) to the Cys114 residue inhibits the enzyme activity.	PF02772,PF02773,PF00438
At1g20160	381.2	91.3	110.4	156.626	ATSBT5.2; FUNCTIONS IN: identical protein binding, serine-type endopeptidase activity; INVOLVED IN: proteolysis, negative regulation of catalytic activity; LOCATED IN: apoplast; EXPRESSED IN: 24 plant structures; EXPRESSED DURING: 12 growth stages; CONTAINS InterPro DOMAIN/s: Protease-associated PA (InterPro:IPR003137), Peptidase S8 and S53, subtilisin, kexin, sedolisin (InterPro:IPR000209), Pept…	PF00082,PF05922,PF02225
At1g19300	274.7	149	95.2	157.36	PARVUS (PARVUS) The PARVUS/GLZ1 gene encodes a putative family 8 glycosyl transferase that contributes to xylan biosynthesis. Its gene expression shows good co-variance with the IRX3 gene involved in secondary cell wall synthesis. PARVUS/GLZ1 is predicted to have galacturonosyltransferase activity and may be involved in the formation of the complex oligosaccharide sequence present at the reducing…	PF01501
At1g64620	170.1	103.5	225.8	158.413	Dof-type zinc finger domain-containing protein; FUNCTIONS IN: transcription factor activity, DNA binding; INVOLVED IN: regulation of transcription; LOCATED IN: cellular_component unknown; EXPRESSED IN: 22 plant structures; EXPRESSED DURING: 11 growth stages; CONTAINS InterPro DOMAIN/s: Zinc finger, Dof-type (InterPro:IPR003851); BEST Arabidopsis thaliana protein match is: Dof-type zinc finger dom…	PF02701
At3g51710	215.9	137.6	138.8	160.357	curculin-like (mannose-binding) lectin family protein / PAN domain-containing protein; FUNCTIONS IN: sugar binding; INVOLVED IN: biological_process unknown; LOCATED IN: endomembrane system; EXPRESSED IN: 18 plant structures; EXPRESSED DURING: 10 growth stages; CONTAINS InterPro DOMAIN/s: Curculin-like (mannose-binding) lectin (InterPro:IPR001480), Apple-like (InterPro:IPR003609), CW (InterPro:IPR…	PF08277,PF01453
At5g26330	236.7	167.5	118.8	167.627	plastocyanin-like domain-containing protein / mavicyanin, putative; FUNCTIONS IN: electron carrier activity, copper ion binding; LOCATED IN: anchored to membrane; EXPRESSED IN: 16 plant structures; EXPRESSED DURING: 10 growth stages; CONTAINS InterPro DOMAIN/s: Plastocyanin-like (InterPro:IPR003245), Cupredoxin (InterPro:IPR008972); BEST Arabidopsis thaliana protein match is: plastocyanin-like do…	PF02298
At3g17420	165	115.3	255.1	169.307	GLYOXYSOMAL PROTEIN KINASE 1 (GPK1) serine/threonine protein kinase-like protein	PF00069
At3g16340	322.4	89.8	174.2	171.49	PDR1; FUNCTIONS IN: ATPase activity, coupled to transmembrane movement of substances; INVOLVED IN: multidrug transport; LOCATED IN: plasma membrane; EXPRESSED IN: 22 plant structures; EXPRESSED DURING: 13 growth stages; CONTAINS InterPro DOMAIN/s: ATPase, AAA+ type, core (InterPro:IPR003593), ABC transporter-like (InterPro:IPR003439), Plant PDR ABC transporter associated (InterPro:IPR013581), ABC…	PF00005,PF01061,PF08370
At5g38000	293.5	130.8	136	173.481	NADP-dependent oxidoreductase, putative; FUNCTIONS IN: oxidoreductase activity, binding, zinc ion binding, catalytic activity; INVOLVED IN: response to oxidative stress; CONTAINS InterPro DOMAIN/s: GroES-like (InterPro:IPR011032), NAD(P)-binding (InterPro:IPR016040), Alcohol dehydrogenase, zinc-binding (InterPro:IPR013149), Alcohol dehydrogenase superfamily, zinc-containing (InterPro:IPR002085); …	PF00107
At1g18880	232	124.2	196.4	178.204	proton-dependent oligopeptide transport (POT) family protein; FUNCTIONS IN: transporter activity; INVOLVED IN: oligopeptide transport; LOCATED IN: membrane; EXPRESSED IN: 22 plant structures; EXPRESSED DURING: 13 growth stages; CONTAINS InterPro DOMAIN/s: TGF-beta receptor, type I/II extracellular region (InterPro:IPR000109), Major facilitator superfamily, general substrate transporter (InterPro:…	PF02588,PF00854,PF00146,PF01925
At3g27960	246.3	112.7	224.1	183.912	kinesin light chain-related; FUNCTIONS IN: binding; INVOLVED IN: biological_process unknown; LOCATED IN: plasma membrane; EXPRESSED IN: 24 plant structures; EXPRESSED DURING: 13 growth stages; CONTAINS InterPro DOMAIN/s: Tetratricopeptide TPR-1 (InterPro:IPR001440), Tetratricopeptide-like helical (InterPro:IPR011990), Tetratricopeptide region (InterPro:IPR013026); BEST Arabidopsis thaliana protei…	PF00515
At1g07090	316.6	119.6	188.7	192.607	LIGHT SENSITIVE HYPOCOTYLS 6 (LSH6) LIGHT SENSITIVE HYPOCOTYLS 6 (LSH6); FUNCTIONS IN: molecular_function unknown; INVOLVED IN: biological_process unknown; LOCATED IN: cellular_component unknown; EXPRESSED IN: 20 plant structures; EXPRESSED DURING: 13 growth stages; CONTAINS InterPro DOMAIN/s: Protein of unknown function DUF640 (InterPro:IPR006936); BEST Arabidopsis thaliana protein match is: LSH…	PF04852
At3g09710	375.6	172.3	111.1	193.008	IQ-DOMAIN 1 (IQD1) Ca(2+)-dependent calmodulin-binding protein. Targeted to the nucleus. Involved in glucosinolate metabolism in response to biotic challenge. Expressed in vascular tissue.	PF00612
At2g28870	252.7	216.1	136.9	195.533	unknown protein; FUNCTIONS IN: molecular_function unknown; INVOLVED IN: biological_process unknown; LOCATED IN: cellular_component unknown; EXPRESSED IN: 19 plant structures; EXPRESSED DURING: 13 growth stages; Has 19 Blast hits to 19 proteins in 5 species: Archae - 0; Bacteria - 0; Metazoa - 0; Fungi - 0; Plants - 19; Viruses - 0; Other Eukaryotes - 0 (source: NCBI BLink).	.
At2g23360	301.8	164	151.4	195.687	transport protein-related; FUNCTIONS IN: molecular_function unknown; INVOLVED IN: biological_process unknown; LOCATED IN: cellular_component unknown; EXPRESSED IN: 21 plant structures; EXPRESSED DURING: 12 growth stages; CONTAINS InterPro DOMAIN/s: Protein of unknown function DUF869, plant (InterPro:IPR008587); BEST Arabidopsis thaliana protein match is: unknown protein (TAIR:AT1G47900.1); Has 30…	PF05911
At3g07130	257.6	114.8	339.9	215.814	PURPLE ACID PHOSPHATASE 15 (PAP15) Encodes PAP15, a purple acid phosphatase with phytase activity. Expression of PAP15 is developmentally and temporally regulated, with strong expression at the early stages of seedling growth and pollen germination. The expression is also organ/tissue-specific, with strongest expression in the vasculature, pollen grains, and roots. Recombinant PAP protein exhibit…	PF00149
At1g52760	197.6	183.3	306.6	223.104	esterase/lipase/thioesterase family protein; FUNCTIONS IN: catalytic activity; LOCATED IN: cellular_component unknown; EXPRESSED IN: 22 plant structures; EXPRESSED DURING: 13 growth stages; CONTAINS InterPro DOMAIN/s: Alpha/beta hydrolase fold-1 (InterPro:IPR000073); BEST Arabidopsis thaliana protein match is: hydrolase, alpha/beta fold family protein (TAIR:AT1G11090.1); Has 1390 Blast hits to 13…	PF00561
At2g20680	256.6	287.9	200	245.382	glycosyl hydrolase family 5 protein / cellulase family protein; FUNCTIONS IN: cation binding, hydrolase activity, hydrolyzing O-glycosyl compounds, catalytic activity; INVOLVED IN: carbohydrate metabolic process; LOCATED IN: endomembrane system; EXPRESSED IN: 23 plant structures; EXPRESSED DURING: 13 growth stages; CONTAINS InterPro DOMAIN/s: Glycoside hydrolase, catalytic core (InterPro:IPR01785…	PF00150
At3g22540	220.9	254.1	295.9	255.142	unknown protein; FUNCTIONS IN: molecular_function unknown; INVOLVED IN: biological_process unknown; LOCATED IN: cellular_component unknown; EXPRESSED IN: 23 plant structures; EXPRESSED DURING: 11 growth stages; CONTAINS InterPro DOMAIN/s: Protein of unknown function DUF1677, plant (InterPro:IPR012876); BEST Arabidopsis thaliana protein match is: unknown protein (TAIR:AT4G14819.1); Has 129 Blast h…	PF07911
At5g07460	240.1	218.6	322.8	256.838	PEPTIDEMETHIONINE SULFOXIDE REDUCTASE 2 (PMSR2) ubiquitous enzyme that repairs oxidatively damaged proteins. Methionine sulfoxide reductase activity. Mutant lacking reductase activity showed increased protein oxidation, nitration and glycation of specific amino acid residues during darkness.	PF01625
At2g24762	372.6	145.2	355	267.801	ARABIDOPSIS THALIANA GLUTAMINE DUMPER 4 (AtGDU4) Encodes a member of the GDU (glutamine dumper) family proteins involved in amino acid export: At4g31730 (GDU1), At4g25760 (GDU2), At5g57685 (GDU3), At2g24762 (GDU4), At5g24920 (GDU5), At3g30725 (GDU6) and At5g38770 (GDU7).	.
At5g05960	374.2	201.3	255.3	267.916	protease inhibitor/seed storage/lipid transfer protein (LTP) family protein; FUNCTIONS IN: lipid binding; INVOLVED IN: lipid transport; LOCATED IN: endomembrane system; EXPRESSED IN: 18 plant structures; EXPRESSED DURING: 10 growth stages; CONTAINS InterPro DOMAIN/s: Bifunctional inhibitor/plant lipid transfer protein/seed storage (InterPro:IPR016140), Plant lipid transfer protein/seed storage/tr…	PF00234
At2g38090	236.8	292.6	321.2	281.283	myb family transcription factor; FUNCTIONS IN: transcription factor activity, DNA binding; INVOLVED IN: regulation of transcription; EXPRESSED IN: 21 plant structures; EXPRESSED DURING: 11 growth stages; CONTAINS InterPro DOMAIN/s: Molecular chaperone, heat shock protein, Hsp40, DnaJ (InterPro:IPR015609), SANT, eukarya (InterPro:IPR017884), Myb-like DNA-binding region, SHAQKYF class (InterPro:IPR…	PF00249
