# Supplementary material for: An Integrative Approach to the Identification of Arabidopsis and Rice Genes Involved in Xylan and Secondary Wall Development
Source: PLoS One. 2010 Nov 23;5(11):e15481. doi: 10.1371/journal.pone.0015481 (PMC2990762; doi:10.1371/journal.pone.0015481)
Supplement: Table S5 — Distribution of Pfam domains across sub-cellular localizations. (XLS) [file pone.0015481.s008.xls]

## Sheet: TableS5
Table S5. Distribution of Pfam domains across sub-cellular localizations. For each Pfam domain is shown the number of proteins that contain this particular Pfam domain and have been annotated based on experimental evidence (identified by IDA assignment) to occur in the given localization according to AmiGO (http://amigo.geneontology.org). NC, nucleus; MT, mitochondrion; V, vacuole; PX, peroxisome…
Pfam ID	Total	EX	NC	MT	V	PX	ER	GO	CT	PM	PL
PF00004	45	0	3	7	1	1	1	0	0	7	24
PF00005	52	0	0	4	6	1	0	0	0	32	9
PF00006	5	0	0	3	0	0	0	0	0	0	2
PF00009	11	0	1	3	1	0	0	0	0	1	5
PF00010	21	0	17	2	0	0	0	0	1	0	1
PF00011	3	0	1	0	0	1	1	0	0	0	0
PF00012	9	0	0	2	0	0	0	0	0	4	3
PF00013	4	0	2	1	0	0	0	0	0	0	1
PF00016	1	0	0	0	0	0	0	0	0	0	1
PF00018	1	0	0	0	0	0	0	0	0	1	0
PF00022	9	0	6	2	0	0	0	0	0	1	0
PF00023	20	1	5	0	0	0	0	0	1	9	4
PF00024	1	0	0	0	0	0	0	0	0	1	0
PF00025	7	0	0	0	1	0	0	1	0	4	1
PF00026	9	3	0	0	2	0	1	0	0	3	0
PF00027	8	0	1	0	0	1	0	0	0	6	0
PF00031	2	0	0	0	1	0	0	0	0	1	0
PF00032	2	0	0	1	0	0	0	0	0	0	1
PF00033	2	0	0	1	0	0	0	0	0	0	1
PF00035	7	0	7	0	0	0	0	0	0	0	0
PF00036	51	0	5	3	8	1	2	0	2	27	2
PF00037	4	0	0	2	0	0	0	0	0	0	2
PF00042	1	0	0	0	0	0	0	0	0	1	0
PF00043	9	1	0	2	0	0	0	0	0	4	2
PF00044	5	0	0	0	0	0	0	0	0	0	5
PF00046	19	0	18	0	1	0	0	0	0	0	0
PF00050	1	0	0	0	0	0	0	0	0	1	0
PF00056	6	0	0	1	0	1	0	0	0	2	2
PF00060	1	0	0	0	1	0	0	0	0	0	0
PF00063	4	0	0	0	1	1	0	0	0	2	0
PF00067	30	0	0	1	1	0	18	0	0	4	6
PF00069	263	1	30	9	4	3	2	0	17	185	9
PF00070	12	0	0	6	0	1	0	0	1	1	3
PF00071	36	0	2	2	1	1	0	0	0	28	1
PF00072	19	0	15	0	1	0	1	0	0	1	1
PF00076	55	0	36	4	0	0	0	0	0	3	12
PF00079	3	1	1	0	0	0	0	0	1	0	0
PF00080	2	0	0	0	0	0	0	0	0	0	2
PF00081	4	0	0	1	0	0	0	0	0	0	3
PF00082	6	5	0	0	0	0	0	0	0	1	0
PF00083	21	0	1	0	3	0	0	0	0	14	3
PF00085	32	0	0	0	0	0	3	1	2	3	23
PF00089	5	0	0	0	0	0	0	0	0	0	5
PF00091	12	0	0	0	1	0	0	0	2	6	3
PF00092	6	0	0	0	0	0	0	0	0	6	0
PF00096	15	0	14	1	0	0	0	0	0	0	0
PF00097	35	0	8	1	2	1	3	0	0	18	2
PF00098	13	0	12	0	0	0	0	0	0	0	1
PF00101	4	0	0	0	0	0	0	0	0	0	4
PF00102	1	0	0	0	0	0	0	0	0	1	0
PF00106	14	0	0	0	0	3	2	0	2	2	5
PF00107	6	1	0	0	0	2	0	0	0	2	1
PF00108	1	0	0	0	0	1	0	0	0	0	0
PF00109	2	0	0	0	0	0	0	0	0	0	2
PF00111	7	0	0	3	0	0	0	0	0	0	4
PF00112	7	0	0	0	7	0	0	0	0	0	0
PF00113	2	0	1	0	0	0	0	0	0	0	1
PF00117	3	0	0	0	0	0	0	0	0	0	3
PF00118	11	0	0	4	0	0	0	0	0	2	5
PF00119	1	0	0	0	0	0	0	0	0	0	1
PF00120	3	0	0	0	0	0	0	0	0	1	2
PF00121	1	0	0	0	0	0	0	0	0	0	1
PF00122	27	0	0	0	1	0	3	2	0	17	4
PF00124	2	0	0	0	0	0	0	0	0	0	2
PF00125	16	0	13	0	2	0	0	0	0	0	1
PF00127	2	0	0	0	0	0	0	0	0	0	2
PF00128	9	1	0	0	0	0	0	0	0	0	8
PF00132	10	0	0	6	0	1	0	0	3	0	0
PF00133	3	0	0	0	0	0	0	0	0	0	3
PF00134	4	0	4	0	0	0	0	0	0	0	0
PF00136	1	1	0	0	0	0	0	0	0	0	0
PF00137	7	0	0	1	4	0	0	0	0	1	1
PF00139	10	1	0	1	0	0	0	0	0	8	0
PF00140	1	0	0	0	0	0	0	0	0	0	1
PF00141	13	2	2	0	5	0	0	0	0	1	3
PF00146	3	0	0	2	0	0	0	0	0	0	1
PF00149	17	0	7	0	2	1	1	0	0	4	1
PF00152	3	0	0	0	0	0	0	0	0	0	3
PF00153	14	0	0	3	0	2	1	0	0	1	7
PF00155	10	0	0	3	0	1	1	0	1	1	3
PF00156	5	0	0	0	0	0	0	0	1	2	2
PF00160	10	0	2	0	0	0	0	1	0	2	5
PF00162	3	0	0	0	0	0	0	0	0	1	2
PF00163	1	0	0	0	0	0	0	0	0	0	1
PF00164	1	0	0	0	0	0	0	0	1	0	0
PF00166	4	0	0	2	0	0	0	0	0	0	2
PF00168	23	0	0	0	1	0	2	0	0	14	6
PF00169	8	0	0	0	2	0	0	0	0	5	1
PF00170	14	0	13	0	0	0	0	0	1	0	0
PF00171	8	0	0	4	0	1	2	0	0	0	1
PF00173	3	0	0	0	0	0	1	0	0	1	1
PF00174	1	0	0	0	0	1	0	0	0	0	0
PF00175	6	0	0	1	0	0	2	0	0	0	3
PF00176	5	0	4	0	0	0	0	0	0	0	1
PF00177	2	0	0	0	0	0	0	0	0	0	2
PF00179	7	0	4	0	1	0	0	0	0	2	0
PF00180	8	0	0	5	0	0	0	0	0	0	3
PF00181	2	0	0	0	0	0	0	0	1	0	1
PF00182	3	2	0	0	0	0	0	0	0	1	0
PF00183	2	0	0	1	0	0	0	0	0	0	1
PF00185	2	0	0	0	0	0	0	0	0	0	2
PF00187	3	2	0	0	0	0	0	0	0	1	0
PF00189	2	0	0	0	0	0	0	0	1	0	1
PF00190	4	3	1	0	0	0	0	0	0	0	0
PF00191	1	0	0	0	1	0	0	0	0	0	0
PF00194	2	0	0	0	0	0	0	0	0	0	2
PF00197	2	1	0	1	0	0	0	0	0	0	0
PF00198	8	0	0	6	0	0	0	0	0	0	2
PF00202	6	0	0	3	0	0	0	0	0	0	3
PF00203	7	0	0	1	0	0	0	0	4	1	1
PF00204	3	0	1	2	0	0	0	0	0	0	0
PF00205	1	0	0	0	0	0	0	0	0	0	1
PF00206	4	0	0	2	0	0	0	0	0	0	2
PF00208	3	0	0	3	0	0	0	0	0	0	0
PF00210	3	0	0	0	0	0	0	0	0	0	3
PF00213	2	0	0	1	0	0	0	0	0	0	1
PF00218	2	0	0	0	0	0	0	0	0	0	2
PF00223	2	0	0	0	0	0	0	0	0	0	2
PF00224	6	0	0	1	0	0	0	0	0	2	3
PF00225	10	0	1	1	0	0	0	0	0	7	1
PF00226	18	0	1	1	1	0	5	0	0	4	6
PF00227	7	0	0	0	2	0	0	0	0	5	0
PF00230	17	0	0	0	3	0	1	0	0	13	0
PF00231	2	0	0	0	0	0	0	0	0	0	2
PF00232	5	0	0	0	3	1	0	0	0	0	1
PF00234	13	2	1	0	0	0	0	0	0	7	3
PF00235	4	0	3	0	0	0	0	0	0	1	0
PF00237	2	0	0	1	0	0	0	0	0	0	1
PF00238	2	0	0	0	0	0	0	0	1	0	1
PF00240	9	0	2	0	3	1	0	0	2	1	0
PF00244	3	0	0	0	0	0	0	0	0	3	0
PF00248	5	0	0	0	0	0	0	0	0	1	4
PF00249	46	0	44	0	0	0	0	0	0	0	2
PF00251	3	0	0	0	3	0	0	0	0	0	0
PF00252	2	0	0	0	0	0	0	0	0	0	2
PF00253	4	0	0	0	0	0	0	0	3	0	1
PF00254	15	0	2	0	2	0	0	0	0	1	10
PF00255	2	0	0	0	0	0	0	0	0	1	1
PF00256	3	0	0	0	0	0	0	0	2	0	1
PF00257	2	0	0	0	0	0	0	0	0	0	2
PF00258	6	0	0	0	0	0	2	0	0	4	0
PF00262	1	0	0	0	0	0	1	0	0	0	0
PF00266	4	0	0	1	0	0	0	0	0	0	3
PF00270	22	0	10	2	2	1	0	0	0	1	6
PF00271	32	0	16	3	2	1	0	0	0	1	9
PF00274	4	0	0	0	0	0	0	0	0	0	4
PF00275	2	0	0	0	0	0	0	0	0	0	2
PF00276	2	0	0	0	0	0	0	0	1	0	1
PF00278	1	0	0	0	0	0	0	0	0	0	1
PF00281	2	0	0	0	1	0	0	0	0	0	1
PF00282	1	0	0	0	0	0	1	0	0	0	0
PF00283	2	0	0	0	0	0	0	0	0	0	2
PF00284	1	0	0	0	0	0	0	0	0	0	1
PF00285	4	0	0	2	0	2	0	0	0	0	0
PF00288	2	0	0	0	0	0	0	0	0	0	2
PF00289	4	0	0	1	0	0	0	0	0	1	2
PF00290	2	0	0	0	0	0	0	0	0	0	2
PF00291	7	0	0	2	0	0	0	0	0	0	5
PF00293	11	0	0	2	1	0	0	0	1	0	7
PF00294	6	0	1	0	0	0	0	0	0	2	3
PF00295	4	0	0	0	2	0	0	0	0	2	0
PF00297	3	0	0	1	0	0	0	0	1	0	1
PF00298	3	0	0	0	0	0	0	0	2	0	1
PF00300	3	0	0	0	0	0	0	0	0	0	3
PF00301	2	0	0	0	0	0	0	0	0	0	2
PF00304	1	0	0	0	0	0	0	0	0	1	0
PF00305	3	0	0	0	0	0	0	0	0	0	3
PF00306	5	0	0	3	0	0	0	0	0	0	2
PF00307	3	0	0	0	1	0	0	0	0	0	0
PF00310	4	0	0	0	0	0	0	0	0	0	4
PF00311	2	0	0	0	0	0	0	0	2	0	0
PF00312	1	0	0	0	0	0	0	0	0	0	1
PF00313	1	0	1	0	0	0	0	0	0	0	0
PF00316	3	0	0	0	0	0	0	0	0	0	3
PF00318	1	0	0	0	0	0	0	0	0	0	1
PF00319	12	0	10	0	0	0	0	0	0	2	0
PF00320	2	0	2	0	0	0	0	0	0	0	0
PF00324	7	0	0	0	1	0	0	0	0	6	0
PF00326	4	0	0	0	0	0	0	0	0	0	4
PF00328	2	0	0	0	0	0	0	0	0	2	0
PF00329	2	0	0	1	0	0	0	0	0	0	1
PF00330	3	0	0	2	0	0	0	0	0	0	1
PF00332	14	1	0	0	0	0	0	0	0	13	0
PF00333	6	0	0	0	0	0	0	1	4	0	1
PF00334	3	0	0	2	0	0	0	0	0	0	1
PF00335	5	0	0	0	1	0	0	0	0	4	0
PF00337	2	0	0	0	0	0	0	1	0	0	1
PF00338	4	0	0	1	0	0	0	0	2	0	1
PF00342	1	0	0	0	0	0	0	0	0	0	1
PF00343	2	0	0	0	0	0	0	0	0	0	2
PF00344	1	0	0	0	0	0	0	0	0	0	1
PF00346	2	0	0	1	0	0	0	0	0	0	1
PF00347	2	0	0	0	0	0	0	0	1	0	1
PF00348	9	0	0	1	0	0	3	0	0	0	5
PF00349	5	0	0	4	0	0	0	0	0	0	1
PF00350	8	0	0	0	0	0	0	0	0	5	2
PF00355	8	0	0	2	0	0	0	0	0	0	6
PF00360	3	0	3	0	0	0	0	0	0	0	0
PF00361	3	0	0	1	0	0	0	0	0	0	2
PF00364	15	0	0	7	0	0	0	0	0	1	7
PF00365	6	0	0	0	0	0	0	0	4	0	2
PF00366	3	0	0	0	0	0	0	0	2	0	1
PF00368	1	0	0	0	0	0	1	0	0	0	0
PF00370	3	0	0	0	0	0	0	0	1	0	2
PF00373	1	0	0	0	0	0	0	0	0	1	0
PF00378	6	0	0	1	0	5	0	0	0	0	0
PF00380	2	0	0	0	0	0	0	0	0	0	2
PF00382	3	0	2	0	0	0	0	0	0	0	1
PF00383	1	0	0	0	0	0	0	0	0	0	1
PF00384	1	0	0	1	0	0	0	0	0	0	0
PF00385	3	0	2	0	0	0	0	0	0	0	1
PF00387	3	0	0	0	0	0	0	0	0	3	0
PF00388	3	0	0	0	0	0	0	0	0	3	0
PF00389	2	0	0	1	0	1	0	0	0	0	0
PF00390	3	0	0	2	0	0	0	0	0	0	1
PF00391	1	0	0	0	0	0	0	0	0	0	1
PF00393	2	0	0	0	0	1	0	0	0	0	1
PF00394	7	2	0	0	0	0	1	0	0	4	0
PF00395	1	0	0	0	0	0	0	0	0	0	1
PF00396	2	0	0	0	2	0	0	0	0	0	0
PF00397	2	0	1	0	1	0	0	0	0	0	0
PF00400	39	0	23	1	0	0	1	0	2	7	4
PF00401	1	0	0	0	0	0	0	0	0	0	1
PF00403	8	0	0	0	0	0	0	1	0	3	4
PF00406	5	0	1	2	0	0	0	0	0	0	2
PF00407	2	0	0	0	1	0	0	0	0	0	1
PF00408	1	0	0	0	0	0	0	0	0	0	1
PF00410	6	0	0	0	0	0	0	0	4	1	1
PF00411	1	0	0	0	0	0	0	0	0	0	1
PF00412	2	0	0	0	0	0	0	0	0	2	0
PF00413	1	0	0	0	0	0	0	0	0	1	0
PF00415	1	0	0	0	0	0	0	0	0	1	0
PF00416	4	0	0	1	0	0	0	0	0	2	1
PF00417	1	0	0	0	0	0	0	0	0	0	1
PF00420	1	0	0	0	0	0	0	0	0	0	1
PF00421	2	0	0	0	0	0	0	0	0	0	2
PF00425	4	0	0	0	0	0	0	0	0	0	4
PF00428	2	0	2	0	0	0	0	0	0	0	0
PF00430	2	0	0	0	0	0	0	0	0	0	2
PF00432	1	0	0	0	1	0	0	0	0	0	0
PF00433	2	0	1	0	0	0	0	0	1	0	0
PF00436	1	0	0	0	0	0	0	0	0	0	1
PF00438	4	0	1	0	0	0	0	0	0	3	0
PF00439	4	0	3	0	0	0	0	0	0	0	1
PF00441	2	0	0	1	0	1	0	0	0	0	0
PF00443	6	0	5	0	0	0	0	0	0	0	1
PF00444	1	0	0	0	0	0	0	0	0	0	1
PF00445	1	0	0	0	1	0	0	0	0	0	0
PF00448	3	0	0	0	0	0	1	0	0	0	2
PF00450	7	1	0	0	6	0	0	0	0	0	0
PF00453	1	0	0	0	0	0	0	0	0	0	1
PF00454	5	0	0	0	1	1	0	0	0	1	2
PF00456	2	0	0	0	0	0	0	0	0	0	2
PF00458	1	0	0	1	0	0	0	0	0	0	0
PF00459	4	0	0	0	0	0	0	0	0	1	3
PF00462	9	0	1	2	0	0	0	0	0	2	4
PF00463	2	0	0	0	0	0	0	0	0	0	2
PF00464	3	0	0	1	0	0	0	0	0	1	1
PF00466	1	0	0	0	0	0	0	0	0	0	1
PF00467	3	0	0	0	0	0	0	0	1	1	1
PF00471	1	0	0	0	0	0	0	0	0	0	1
PF00472	2	0	0	0	0	0	0	0	0	0	2
PF00474	1	0	0	0	0	0	0	0	0	1	0
PF00479	2	0	0	0	0	0	0	0	0	0	2
PF00481	22	0	3	0	0	0	0	0	0	18	1
PF00483	3	0	0	0	0	1	0	0	0	0	2
PF00484	4	0	0	1	0	0	0	0	0	0	3
PF00485	1	0	0	0	0	0	0	0	0	0	1
PF00487	3	0	0	0	0	0	0	0	0	0	3
PF00488	4	0	3	0	0	0	0	0	0	1	0
PF00490	1	0	0	0	0	0	0	0	0	0	1
PF00491	1	0	0	0	0	0	0	0	0	0	1
PF00493	2	0	2	0	0	0	0	0	0	0	0
PF00494	2	0	0	0	0	0	1	0	0	0	1
PF00498	4	0	0	0	0	0	0	0	0	2	2
PF00501	15	0	0	0	0	8	1	0	0	1	5
PF00503	4	0	3	0	0	0	0	0	0	1	0
PF00504	21	0	0	0	0	0	0	0	0	0	21
PF00505	3	0	2	0	0	0	0	0	0	0	1
PF00507	1	0	0	0	0	0	0	0	0	0	1
PF00512	6	0	3	0	1	0	1	0	0	1	0
PF00514	13	0	7	0	0	0	0	0	0	5	1
PF00515	23	1	5	2	3	0	1	0	0	8	3
PF00520	7	0	1	0	1	0	0	0	0	5	0
PF00521	2	0	1	0	0	0	0	0	0	0	1
PF00533	2	0	2	0	0	0	0	0	0	0	0
PF00534	13	0	0	0	0	0	1	2	0	3	7
PF00535	3	0	1	0	0	0	1	1	0	0	0
PF00536	1	0	0	0	0	0	0	0	0	0	1
PF00538	2	0	2	0	0	0	0	0	0	0	0
PF00542	3	0	0	1	0	0	0	0	0	0	2
PF00543	1	0	0	0	0	0	0	0	0	0	1
PF00549	3	0	0	3	0	0	0	0	0	0	0
PF00550	6	0	0	2	0	0	0	0	0	0	4
PF00551	3	0	0	2	0	0	0	0	0	0	1
PF00557	5	0	1	0	0	0	0	0	0	1	3
PF00560	108	1	0	7	1	0	0	1	1	89	8
PF00561	17	1	0	0	3	1	1	0	0	4	7
PF00562	2	0	1	0	0	0	0	0	0	0	1
PF00564	4	0	0	0	1	0	0	0	2	0	1
PF00566	3	0	0	1	0	0	0	0	1	0	1
PF00569	1	0	1	0	0	0	0	0	0	0	0
PF00571	9	0	0	2	0	0	0	1	0	3	3
PF00572	4	0	0	0	0	0	0	0	3	0	1
PF00573	1	0	0	0	0	0	0	0	0	0	1
PF00574	10	0	0	1	0	0	0	0	0	0	9
PF00575	6	0	1	0	0	0	0	0	0	0	5
PF00578	4	0	0	0	0	0	0	0	0	0	4
PF00579	2	0	0	0	0	0	0	0	0	0	2
PF00581	4	0	0	1	0	0	0	0	0	0	3
PF00582	5	0	0	0	2	0	0	0	0	3	0
PF00583	5	0	2	0	0	0	0	0	0	0	3
PF00584	1	0	0	0	0	0	0	0	0	1	0
PF00586	1	0	0	0	0	0	0	0	0	0	1
PF00587	5	0	0	1	0	0	0	0	0	0	4
PF00588	1	0	0	0	0	0	0	0	0	0	1
PF00590	1	0	0	0	0	0	0	0	0	0	1
PF00591	1	0	0	0	0	0	0	0	0	0	1
PF00595	1	0	0	0	0	0	0	0	0	0	1
PF00596	1	0	0	0	0	0	0	0	0	0	1
PF00609	2	0	0	0	0	0	0	0	0	2	0
PF00612	17	0	1	0	2	1	0	0	1	12	0
PF00613	1	0	0	0	0	0	0	0	0	1	0
PF00614	6	0	0	0	1	0	0	0	0	3	2
PF00620	2	0	0	0	0	0	0	0	0	1	1
PF00623	4	0	3	0	0	0	0	0	0	0	1
PF00626	1	0	0	0	0	0	0	0	0	0	0
PF00627	3	0	0	1	0	0	0	0	0	1	1
PF00628	17	0	16	0	0	0	0	0	0	0	1
PF00632	1	0	0	0	0	0	0	0	0	1	0
PF00633	2	0	0	0	0	0	0	0	0	0	2
PF00634	1	0	0	1	0	0	0	0	0	0	0
PF00635	4	0	0	0	0	0	0	0	0	4	0
PF00636	5	0	4	0	1	0	0	0	0	0	0
PF00637	2	0	0	0	0	0	0	0	0	1	1
PF00639	2	0	0	0	0	0	0	0	0	1	1
PF00641	3	0	1	0	0	0	0	0	0	0	2
PF00642	6	0	5	0	0	0	0	0	0	0	1
PF00643	6	0	5	0	0	0	0	0	0	1	0
PF00644	2	0	2	0	0	0	0	0	0	0	0
PF00646	25	0	12	0	2	1	0	0	0	5	5
PF00647	1	0	0	0	0	0	0	0	0	1	0
PF00648	1	0	0	0	0	0	0	0	0	1	0
PF00650	8	0	0	0	0	0	0	0	0	6	2
PF00651	10	0	6	0	0	0	0	0	0	4	0
PF00654	3	0	0	0	0	0	0	1	0	1	1
PF00656	1	1	0	0	0	0	0	0	0	0	0
PF00657	11	3	0	0	7	0	0	0	0	0	1
PF00662	2	0	0	1	0	0	0	0	0	0	1
PF00664	25	0	0	4	5	0	0	0	0	13	3
PF00667	2	0	0	0	0	0	2	0	0	0	0
PF00670	1	0	0	0	0	0	0	0	0	1	0
PF00673	2	0	0	0	1	0	0	0	0	0	1
PF00675	7	0	0	3	0	0	0	0	0	0	4
PF00676	6	0	0	5	0	0	0	0	0	0	1
PF00677	1	0	0	0	0	0	0	0	0	0	1
PF00679	6	0	1	2	0	0	0	0	0	0	3
PF00682	5	0	0	1	0	0	0	0	0	0	4
PF00684	6	0	0	1	0	0	0	0	0	2	3
PF00686	3	0	0	0	0	0	0	0	1	0	2
PF00687	2	0	0	0	0	0	0	0	1	0	1
PF00689	7	0	0	0	1	0	2	1	0	3	0
PF00690	18	0	0	0	1	0	2	1	0	13	1
PF00694	5	0	0	2	0	0	0	0	0	0	3
PF00696	6	0	0	0	0	0	0	0	0	0	6
PF00697	3	0	0	0	0	0	0	0	0	0	3
PF00698	1	0	0	0	0	0	0	0	0	0	1
PF00701	1	0	0	0	0	0	0	0	0	0	1
PF00702	38	0	0	1	1	0	3	2	0	17	14
PF00703	2	0	0	0	1	0	0	0	0	0	1
PF00705	1	0	1	0	0	0	0	0	0	0	0
PF00707	2	0	0	0	0	0	0	0	0	0	2
PF00709	1	0	0	0	0	0	0	0	0	0	1
PF00717	3	0	0	0	0	0	0	0	0	1	2
PF00719	2	0	1	0	0	0	0	0	0	0	1
PF00722	2	0	0	0	0	0	0	0	0	2	0
PF00724	1	0	0	0	0	1	0	0	0	0	0
PF00725	1	0	0	0	0	1	0	0	0	0	0
PF00728	3	0	0	0	1	0	0	0	0	2	0
PF00730	5	0	3	0	0	0	0	0	0	0	2
PF00731	1	0	0	0	0	0	0	0	0	0	1
PF00732	1	0	0	0	0	0	1	0	0	0	0
PF00736	2	1	0	0	0	0	0	0	0	1	0
PF00737	1	0	0	0	0	0	0	0	0	0	1
PF00742	2	0	0	0	0	0	0	0	0	0	2
PF00743	1	0	0	0	1	0	0	0	0	0	0
PF00745	1	0	0	0	0	0	0	0	0	0	1
PF00749	1	0	0	0	0	0	0	0	0	0	1
PF00750	1	0	0	0	0	0	0	0	0	0	1
PF00753	5	0	3	0	0	0	0	0	0	0	2
PF00756	1	1	0	0	0	0	0	0	0	0	0
PF00759	5	0	0	0	0	0	0	0	0	4	1
PF00762	2	0	0	0	0	0	0	0	0	0	2
PF00763	2	0	0	0	0	0	0	0	0	0	2
PF00764	1	0	0	0	0	0	0	0	0	0	1
PF00766	1	0	0	1	0	0	0	0	0	0	0
PF00773	1	0	0	0	0	0	0	0	0	0	1
PF00777	2	0	0	0	0	0	0	2	0	0	0
PF00781	5	0	0	1	1	0	0	0	0	3	0
PF00782	4	0	1	0	0	0	0	0	0	0	3
PF00784	1	0	0	0	0	0	0	0	0	1	0
PF00786	4	0	0	0	0	0	0	0	0	4	0
PF00787	1	0	0	0	0	0	0	0	0	0	0
PF00789	1	0	0	0	0	0	0	0	1	0	0
PF00790	4	0	0	0	0	0	0	0	0	4	0
PF00795	1	0	0	0	0	0	0	0	0	0	1
PF00800	6	0	0	0	0	0	0	0	0	0	6
PF00804	11	0	1	0	1	0	0	2	0	6	0
PF00805	3	0	0	0	0	0	0	0	0	0	3
PF00806	3	0	1	0	1	0	0	0	0	1	0
PF00808	5	0	5	0	0	0	0	0	0	0	0
PF00809	1	0	0	0	0	0	0	0	1	0	0
PF00810	2	0	0	0	0	0	0	2	0	0	0
PF00814	1	0	0	1	0	0	0	0	0	0	0
PF00815	1	0	0	0	0	0	0	0	0	0	1
PF00827	1	0	0	0	0	0	0	0	0	1	0
PF00828	1	0	0	0	0	0	0	0	1	0	0
PF00829	2	0	0	1	0	0	0	0	0	0	1
PF00830	1	0	0	0	0	0	0	0	0	0	1
PF00831	4	0	0	0	0	0	0	0	2	1	1
PF00832	3	0	0	0	0	0	0	0	3	0	0
PF00833	2	0	0	0	0	0	0	0	2	0	0
PF00834	2	0	0	0	0	0	0	0	0	1	1
PF00847	15	0	14	0	0	0	0	0	0	0	1
PF00849	1	0	0	0	0	0	0	0	0	0	1
PF00850	3	0	2	0	0	0	0	0	0	0	1
PF00852	1	0	0	0	0	0	0	1	0	0	0
PF00854	17	0	0	0	1	0	0	0	0	16	0
PF00855	2	0	1	0	0	0	0	0	0	0	1
PF00856	15	0	11	0	0	0	0	0	0	0	4
PF00860	5	0	0	0	1	0	0	0	0	4	0
PF00861	1	0	0	0	0	0	0	0	0	0	1
PF00875	1	0	1	0	0	0	0	0	0	0	0
PF00883	2	0	0	0	1	0	0	0	0	0	1
PF00885	1	0	0	0	0	0	0	0	0	0	1
PF00886	1	0	0	0	0	0	0	0	0	0	1
PF00887	4	1	0	0	0	0	0	0	2	1	0
PF00888	3	0	2	0	0	0	0	0	0	0	1
PF00889	2	0	0	1	0	0	0	0	0	0	1
PF00890	6	0	0	2	0	0	2	0	0	0	2
PF00892	5	0	0	0	0	0	0	1	0	2	2
PF00899	3	0	0	0	0	1	0	0	1	1	0
PF00900	1	0	0	0	0	0	0	0	0	1	0
PF00902	1	0	0	0	0	0	0	0	0	0	1
PF00903	3	0	0	0	0	0	0	0	0	0	3
PF00909	5	0	0	0	0	0	0	0	0	5	0
PF00916	2	0	0	0	1	0	0	0	0	1	0
PF00917	3	0	0	1	1	0	0	0	0	0	1
PF00919	1	0	0	0	0	0	1	0	0	0	0
PF00920	1	0	0	0	0	0	0	0	0	0	1
PF00923	2	0	0	0	0	0	0	0	0	0	2
PF00924	6	0	0	0	0	0	0	0	0	3	3
PF00925	3	0	0	0	0	0	0	0	0	0	3
PF00926	3	0	0	0	0	0	0	0	0	0	3
PF00928	1	0	0	0	0	0	0	0	0	1	0
PF00931	16	1	1	3	0	0	0	0	0	8	3
PF00933	4	2	0	0	1	0	0	0	0	1	0
PF00935	2	0	0	0	0	0	0	0	2	0	0
PF00939	3	0	0	0	1	0	0	0	0	0	2
PF00940	1	0	0	1	0	0	0	0	0	0	0
PF00954	6	0	1	0	0	0	0	0	1	4	0
PF00955	2	0	0	0	0	0	0	0	0	2	0
PF00956	4	0	4	0	0	0	0	0	0	0	0
PF00957	8	0	0	0	3	0	0	0	0	3	1
PF00970	1	0	0	1	0	0	0	0	0	0	0
PF00977	2	0	0	0	0	0	0	0	0	0	2
PF00982	1	0	0	1	0	0	0	0	0	0	0
PF00986	2	0	0	2	0	0	0	0	0	0	0
PF00988	1	0	0	0	0	0	0	0	0	0	1
PF00989	3	0	3	0	0	0	0	0	0	0	0
PF00995	2	0	0	0	1	0	0	0	0	1	0
PF00999	7	0	0	1	0	0	0	0	0	3	3
PF01000	3	0	2	0	0	0	0	0	0	0	1
PF01010	1	0	0	0	0	0	0	0	0	0	1
PF01012	2	0	0	2	0	0	0	0	0	0	0
PF01014	1	0	0	0	0	1	0	0	0	0	0
PF01016	1	0	0	0	0	0	0	0	0	0	1
PF01018	1	0	0	0	0	0	0	0	0	0	1
PF01019	3	2	0	0	1	0	0	0	0	0	0
PF01025	3	0	0	1	0	0	0	0	0	0	2
PF01027	1	0	0	0	1	0	0	0	0	0	0
PF01029	1	0	0	0	0	0	0	0	0	0	1
PF01031	4	0	0	0	0	0	0	0	0	4	0
PF01039	3	0	0	1	0	0	0	0	0	1	1
PF01040	3	0	0	0	0	0	0	0	0	0	3
PF01042	1	0	0	0	0	0	0	0	0	0	1
PF01043	1	0	0	0	0	0	0	0	0	0	1
PF01048	1	0	0	0	0	0	0	0	0	1	0
PF01053	3	0	0	0	0	0	0	0	1	0	2
PF01055	2	0	0	0	1	0	0	0	0	0	1
PF01058	2	0	0	1	0	0	0	0	0	0	1
PF01061	15	0	0	0	1	0	0	0	0	13	1
PF01063	6	0	0	1	0	0	0	0	1	0	4
PF01066	3	0	0	1	0	0	0	0	0	0	2
PF01067	1	0	0	0	0	0	0	0	0	1	0
PF01070	2	0	0	0	0	2	0	0	0	0	0
PF01071	1	0	0	0	0	0	0	0	0	0	1
PF01073	2	0	0	0	0	0	1	0	0	1	0
PF01074	2	0	0	0	1	0	0	1	0	0	0
PF01077	2	0	0	0	0	0	0	0	0	0	2
PF01078	3	0	0	0	0	0	0	0	0	0	3
PF01084	1	0	0	0	0	0	0	0	0	0	1
PF01088	2	0	2	0	0	0	0	0	0	0	0
PF01090	1	0	0	0	0	0	0	0	1	0	0
PF01094	1	0	0	0	1	0	0	0	0	0	0
PF01095	4	1	0	0	0	0	0	0	0	3	0
PF01096	2	0	2	0	0	0	0	0	0	0	0
PF01103	3	0	0	0	0	0	0	0	0	0	3
PF01105	3	0	0	0	1	0	2	0	0	0	0
PF01106	5	0	0	2	0	0	0	0	0	0	3
PF01113	2	0	0	0	0	0	0	0	0	0	2
PF01116	1	0	1	0	0	0	0	0	0	0	0
PF01118	2	0	0	0	0	0	0	0	0	0	2
PF01119	1	0	1	0	0	0	0	0	0	0	0
PF01120	1	0	0	0	1	0	0	0	0	0	0
PF01124	1	0	0	0	1	0	0	0	0	0	0
PF01126	1	0	0	0	0	0	0	0	0	0	1
PF01127	2	0	0	2	0	0	0	0	0	0	0
PF01128	1	0	0	0	0	0	0	0	0	0	1
PF01132	1	0	0	0	0	0	0	0	0	0	1
PF01138	3	0	2	0	0	0	0	0	0	0	1
PF01145	13	0	0	8	0	0	0	0	0	5	0
PF01148	2	0	0	0	0	0	0	0	0	0	2
PF01150	2	0	0	0	1	0	0	1	0	0	0
PF01156	1	0	0	0	0	0	0	0	1	0	0
PF01157	2	0	0	0	0	0	0	0	2	0	0
PF01158	1	0	0	0	0	0	0	0	1	0	0
PF01161	1	0	1	0	0	0	0	0	0	0	0
PF01162	1	0	0	0	0	0	0	0	0	0	1
PF01165	1	0	0	0	0	0	0	0	0	0	1
PF01167	1	0	0	0	0	0	0	0	0	1	0
PF01169	1	0	0	0	0	0	0	0	0	0	1
PF01174	1	0	0	0	0	0	0	0	1	0	0
PF01176	1	0	0	0	0	0	0	0	0	0	1
PF01177	1	0	0	0	0	0	0	0	0	0	1
PF01179	2	0	0	0	1	1	0	0	0	0	0
PF01180	2	0	0	1	0	0	0	0	0	0	1
PF01182	2	0	0	0	0	0	0	0	0	1	1
PF01187	3	0	0	0	0	1	0	0	0	0	2
PF01188	1	0	0	0	0	0	0	0	0	0	1
PF01189	1	0	1	0	0	0	0	0	0	0	0
PF01190	1	0	0	0	0	0	0	0	0	1	0
PF01193	4	0	3	0	0	0	0	0	0	0	1
PF01195	1	0	0	0	0	0	0	0	0	0	1
PF01196	1	0	0	0	0	0	0	0	0	0	1
PF01197	1	0	0	0	0	0	0	0	0	0	1
PF01198	2	0	0	0	0	0	0	0	2	0	0
PF01199	1	0	0	0	0	0	0	0	1	0	0
PF01200	2	0	0	0	0	0	0	0	2	0	0
PF01201	1	0	0	0	0	0	0	0	1	0	0
PF01202	1	0	0	0	0	0	0	0	0	0	1
PF01207	2	0	1	0	1	0	0	0	0	0	0
PF01208	2	0	0	0	0	0	0	0	0	0	2
PF01209	2	0	0	1	0	0	0	0	0	0	1
PF01210	1	0	0	0	0	0	0	0	1	0	0
PF01214	1	0	1	0	0	0	0	0	0	0	0
PF01215	1	0	0	1	0	0	0	0	0	0	0
PF01217	1	0	0	0	0	0	0	0	0	1	0
PF01218	1	0	0	0	0	0	0	0	0	0	1
PF01225	1	0	0	0	0	0	0	0	0	0	1
PF01230	3	0	0	0	0	2	0	0	0	0	1
PF01233	1	0	0	0	0	0	0	0	1	0	0
PF01237	1	0	0	0	0	0	1	0	0	0	0
PF01241	2	0	0	0	0	0	0	0	0	0	2
PF01243	1	0	0	0	0	0	0	0	0	0	1
PF01245	2	0	0	0	0	0	0	0	0	0	2
PF01247	4	0	0	0	0	0	0	0	4	0	0
PF01248	7	0	3	0	0	0	0	0	4	0	0
PF01249	2	0	0	0	0	0	0	0	2	0	0
PF01250	1	0	0	0	0	0	0	0	0	0	1
PF01255	1	0	0	0	0	0	0	0	0	0	1
PF01257	1	0	0	1	0	0	0	0	0	0	0
PF01259	1	0	0	0	0	0	0	0	0	0	1
PF01262	1	0	0	0	0	0	0	0	1	0	0
PF01263	2	0	0	0	0	0	0	0	0	1	1
PF01266	4	0	0	2	0	0	0	0	0	0	2
PF01267	1	0	1	0	0	0	0	0	0	0	0
PF01269	2	0	2	0	0	0	0	0	0	0	0
PF01277	5	5	0	0	0	0	0	0	0	0	0
PF01280	1	0	0	0	0	0	0	0	1	0	0
PF01281	1	0	0	0	0	0	0	0	0	0	1
PF01282	1	0	0	0	0	0	0	0	1	0	0
PF01283	2	0	0	0	0	0	0	0	2	0	0
PF01287	1	0	1	0	0	0	0	0	0	0	0
PF01288	1	0	0	0	0	0	0	0	1	0	0
PF01293	1	0	1	0	0	0	0	0	0	0	0
PF01294	2	0	0	0	0	0	0	0	2	0	0
PF01301	3	2	0	0	1	0	0	0	0	0	0
PF01302	2	0	1	0	0	0	0	0	0	0	1
PF01305	1	0	0	0	0	0	0	0	0	0	1
PF01321	2	0	0	0	0	0	0	0	0	1	1
PF01326	4	0	0	0	0	0	0	0	0	0	4
PF01327	2	0	0	1	0	0	0	0	0	0	1
PF01329	1	0	0	0	0	0	0	0	0	0	1
PF01333	1	0	0	0	0	0	0	0	0	0	1
PF01336	7	0	3	0	0	0	0	0	0	1	3
PF01343	1	0	0	0	0	0	0	0	0	0	1
PF01344	12	0	3	0	0	1	0	2	2	2	2
PF01357	1	0	0	0	0	0	0	0	0	0	1
PF01363	2	0	0	1	0	0	0	0	0	1	0
PF01369	1	0	0	0	0	0	0	0	0	0	1
PF01370	23	1	0	1	0	0	0	3	3	6	9
PF01373	4	0	0	0	0	0	0	0	0	0	4
PF01381	3	0	3	0	0	0	0	0	0	0	0
PF01384	1	0	0	0	0	0	0	0	0	0	1
PF01388	2	0	0	0	1	0	0	0	0	0	1
PF01394	2	0	0	0	0	0	0	0	0	1	1
PF01397	3	0	0	0	0	1	0	0	0	0	2
PF01398	2	0	1	0	0	0	0	0	0	0	1
PF01399	8	0	4	0	0	0	0	0	0	4	0
PF01405	1	0	0	0	0	0	0	0	0	0	1
PF01406	1	0	0	0	0	0	0	0	0	0	1
PF01409	1	0	0	0	0	0	0	0	0	0	1
PF01411	1	0	0	0	0	0	0	0	0	0	1
PF01412	2	0	0	0	0	0	0	0	1	1	0
PF01417	1	0	0	0	0	0	0	0	0	1	0
PF01419	5	0	2	0	1	0	0	0	0	0	2
PF01422	1	0	1	0	0	0	0	0	0	0	0
PF01423	8	0	7	0	0	0	0	0	0	1	0
PF01424	1	0	1	0	0	0	0	0	0	0	0
PF01425	2	0	0	1	0	0	0	0	0	0	1
PF01426	1	0	1	0	0	0	0	0	0	0	0
PF01429	2	0	2	0	0	0	0	0	0	0	0
PF01432	2	0	0	0	0	0	0	0	0	0	2
PF01433	2	0	0	0	0	0	0	0	0	1	1
PF01434	15	0	0	3	0	0	0	0	0	0	12
PF01435	1	0	0	0	0	0	1	0	0	0	0
PF01436	1	0	0	0	0	0	0	0	0	0	1
PF01448	1	0	0	0	1	0	0	0	0	0	0
PF01450	1	0	0	0	0	0	0	0	0	0	1
PF01451	1	0	0	0	0	0	0	0	0	0	1
PF01453	9	1	1	0	0	0	0	0	1	6	0
PF01458	2	0	0	0	0	0	0	0	0	0	2
PF01459	2	0	0	2	0	0	0	0	0	0	0
PF01465	1	0	0	0	0	0	0	1	0	0	0
PF01466	2	0	2	0	0	0	0	0	0	0	0
PF01467	2	0	0	1	0	0	0	0	0	0	1
PF01471	2	0	0	0	0	0	0	0	0	1	1
PF01474	1	0	0	0	0	0	0	0	0	0	1
PF01476	5	0	0	0	0	0	0	0	0	5	0
PF01477	4	0	0	0	0	0	0	0	0	0	4
PF01479	7	0	0	1	0	0	0	0	1	1	4
PF01486	9	0	8	0	0	0	0	0	0	1	0
PF01487	1	0	0	0	0	0	0	0	0	0	1
PF01488	2	0	0	0	0	0	0	0	0	0	2
PF01490	13	0	0	0	0	0	0	0	0	12	1
PF01493	3	0	0	0	0	0	0	0	0	0	3
PF01494	1	0	0	0	0	0	0	0	0	0	1
PF01496	2	0	0	0	2	0	0	0	0	0	0
PF01501	5	0	0	0	0	0	1	4	0	0	0
PF01502	1	0	0	0	0	0	0	0	0	0	1
PF01503	1	0	0	0	0	0	0	0	0	0	1
PF01504	5	0	0	1	0	0	0	0	0	4	0
PF01507	3	0	0	0	0	0	0	0	0	0	3
PF01512	1	0	0	1	0	0	0	0	0	0	0
PF01513	2	0	0	0	0	0	0	0	1	0	1
PF01521	1	0	0	0	0	0	0	0	0	0	1
PF01529	9	0	0	0	0	0	0	0	0	9	0
PF01532	3	0	0	0	0	0	0	3	0	0	0
PF01535	42	0	2	13	1	0	0	0	0	2	24
PF01544	4	0	0	0	1	0	0	0	0	2	1
PF01545	3	0	0	0	2	0	0	0	0	1	0
PF01546	3	0	0	0	1	0	2	0	0	0	0
PF01549	1	0	1	0	0	0	0	0	0	0	0
PF01553	5	0	0	1	0	0	1	0	0	1	2
PF01554	11	0	0	0	1	0	0	0	0	7	3
PF01556	6	0	0	1	0	0	0	0	0	2	3
PF01557	1	0	0	1	0	0	0	0	0	0	0
PF01564	1	0	0	0	0	0	0	0	0	1	0
PF01565	7	0	0	3	2	0	1	0	0	1	0
PF01566	2	0	0	0	2	0	0	0	0	0	0
PF01569	3	0	0	0	0	0	0	0	0	3	0
PF01571	1	0	0	0	0	0	0	0	0	0	1
PF01575	1	0	0	0	0	1	0	0	0	0	0
PF01578	1	0	0	1	0	0	0	0	0	0	0
PF01582	7	0	1	2	0	0	1	0	0	1	2
PF01583	3	0	0	0	0	0	0	0	0	0	3
PF01585	2	0	2	0	0	0	0	0	0	0	0
PF01588	1	0	0	0	0	0	0	0	0	0	1
PF01590	4	0	3	0	0	0	1	0	0	0	0
PF01592	3	0	0	3	0	0	0	0	0	0	0
PF01593	8	0	1	0	0	2	0	0	0	0	5
PF01595	3	0	0	1	0	0	0	0	0	2	0
PF01597	2	0	0	2	0	0	0	0	0	0	0
PF01599	2	0	0	0	0	0	0	0	2	0	0
PF01602	5	0	0	0	0	0	0	0	0	4	1
PF01603	3	0	1	1	0	1	0	0	0	0	0
PF01619	1	0	0	1	0	0	0	0	0	0	0
PF01624	1	0	0	0	0	0	0	0	0	1	0
PF01625	2	0	0	0	0	0	0	0	1	0	1
PF01627	5	0	5	0	0	0	0	0	0	0	0
PF01632	1	0	0	0	0	0	0	0	0	0	1
PF01634	2	0	0	0	0	0	0	0	0	0	2
PF01636	1	0	0	0	0	0	0	0	0	0	1
PF01641	3	0	1	0	0	0	0	0	0	0	2
PF01645	3	0	0	0	0	0	0	0	0	0	3
PF01649	1	0	0	0	0	0	0	0	0	0	1
PF01650	2	1	0	0	1	0	0	0	0	0	0
PF01652	2	0	2	0	0	0	0	0	0	0	0
PF01655	1	0	0	0	0	0	0	0	1	0	0
PF01656	1	0	0	0	0	0	0	0	0	0	1
PF01657	23	3	0	1	2	0	0	0	0	16	1
PF01663	2	0	0	0	2	0	0	0	0	0	0
PF01667	1	0	0	0	0	0	0	0	1	0	0
PF01678	1	0	0	0	0	0	0	0	0	0	1
PF01680	2	0	0	0	0	0	0	0	1	1	0
PF01694	5	0	0	1	0	0	0	2	0	1	1
PF01697	1	0	0	0	1	0	0	0	0	0	0
PF01699	7	0	0	0	7	0	0	0	0	0	0
PF01701	1	0	0	0	0	0	0	0	0	0	1
PF01704	3	0	0	0	0	0	0	0	0	3	0
PF01709	1	0	0	0	0	0	0	0	0	0	1
PF01712	1	0	1	0	0	0	0	0	0	0	0
PF01715	1	0	0	0	0	0	0	0	1	0	0
PF01716	2	0	0	0	0	0	0	0	0	0	2
PF01717	2	0	0	0	0	0	0	0	2	0	0
PF01722	2	0	0	0	0	0	0	0	0	0	2
PF01729	1	0	0	0	0	0	0	0	0	0	1
PF01733	4	0	0	0	0	0	0	0	0	4	0
PF01737	1	0	0	0	0	0	0	0	0	0	1
PF01738	2	0	0	0	0	0	0	0	0	0	2
PF01740	1	0	0	0	0	0	0	0	0	1	0
PF01743	2	0	0	1	0	0	0	0	0	0	1
PF01747	2	0	0	0	0	0	0	0	0	0	2
PF01749	2	0	2	0	0	0	0	0	0	0	0
PF01751	2	0	0	2	0	0	0	0	0	0	0
PF01753	2	0	2	0	0	0	0	0	0	0	0
PF01756	1	0	0	0	0	1	0	0	0	0	0
PF01758	4	0	0	0	0	0	0	0	0	0	4
PF01761	1	0	0	0	0	0	0	0	0	0	1
PF01762	3	0	0	0	0	0	0	2	0	0	1
PF01764	6	0	0	0	0	0	0	0	0	1	5
PF01765	2	0	0	1	0	0	0	0	0	0	1
PF01775	3	0	0	0	0	0	0	0	2	1	0
PF01776	1	0	0	0	0	0	0	0	1	0	0
PF01777	3	0	0	0	0	0	0	0	3	0	0
PF01779	1	0	0	0	0	0	0	0	1	0	0
PF01780	2	0	0	0	0	0	0	0	2	0	0
PF01781	2	0	0	0	0	0	0	0	2	0	0
PF01782	1	0	0	0	0	0	0	0	0	0	1
PF01786	4	0	0	4	0	0	0	0	0	0	0
PF01789	7	0	0	0	0	0	0	0	0	0	7
PF01794	8	0	0	0	1	0	0	0	0	6	1
PF01798	3	0	3	0	0	0	0	0	0	0	0
PF01805	1	0	1	0	0	0	0	0	0	0	0
PF01808	1	0	0	0	0	0	0	0	0	0	1
PF01812	2	0	0	1	0	0	0	0	0	0	1
PF01813	1	0	0	0	1	0	0	0	0	0	0
PF01820	1	0	0	0	0	0	0	0	0	0	1
PF01823	1	0	0	0	0	0	0	0	0	1	0
PF01839	1	0	0	0	0	0	0	0	0	1	0
PF01841	2	0	0	0	0	0	0	0	1	0	1
PF01842	9	0	0	1	0	0	0	0	2	0	6
PF01843	1	0	0	0	0	1	0	0	0	0	0
PF01846	1	0	1	0	0	0	0	0	0	0	0
PF01851	3	0	0	0	0	0	0	0	1	2	0
PF01852	9	0	7	0	0	0	0	0	0	2	0
PF01853	2	0	2	0	0	0	0	0	0	0	0
PF01857	1	0	0	0	0	0	0	0	1	0	0
PF01858	1	0	0	0	0	0	0	0	1	0	0
PF01873	2	0	1	0	0	0	0	0	0	1	0
PF01883	1	0	0	0	0	0	0	0	0	0	1
PF01894	1	0	0	0	0	0	0	0	0	0	1
PF01900	1	0	0	0	1	0	0	0	0	0	0
PF01903	1	0	0	0	0	0	0	0	0	0	1
PF01907	2	0	0	0	0	0	0	0	2	0	0
PF01909	3	0	3	0	0	0	0	0	0	0	0
PF01912	1	0	1	0	0	0	0	0	0	0	0
PF01915	4	2	0	0	1	0	0	0	0	1	0
PF01926	9	0	1	0	0	0	0	0	1	0	7
PF01940	1	0	0	0	0	0	0	0	0	0	1
PF01946	1	0	0	0	0	0	0	0	0	0	1
PF01960	1	0	0	0	0	0	0	0	0	0	1
PF01964	1	0	0	0	0	0	0	0	0	0	1
PF01965	3	0	0	0	0	0	0	0	0	1	2
PF01966	4	0	0	0	0	0	0	0	0	0	4
PF01979	2	0	0	0	0	0	1	0	0	0	1
PF01985	3	0	0	0	0	0	0	0	0	0	3
PF01987	1	0	0	0	0	0	1	0	0	0	0
PF01988	1	0	0	0	1	0	0	0	0	0	0
PF01991	3	0	0	0	3	0	0	0	0	0	0
PF01992	2	0	0	0	2	0	0	0	0	0	0
PF01997	1	0	0	0	0	0	0	0	0	0	1
PF02020	1	0	1	0	0	0	0	0	0	0	0
PF02033	1	0	0	0	0	0	0	0	0	0	1
PF02036	1	0	0	0	0	1	0	0	0	0	0
PF02037	4	0	2	0	0	0	0	0	0	0	2
PF02045	1	0	1	0	0	0	0	0	0	0	0
PF02046	1	0	0	1	0	0	0	0	0	0	0
PF02065	2	1	0	0	1	0	0	0	0	0	0
PF02071	1	0	0	0	0	0	0	0	0	1	0
PF02089	1	0	0	0	1	0	0	0	0	0	0
PF02091	1	0	0	0	0	0	0	0	0	0	1
PF02092	1	0	0	0	0	0	0	0	0	0	1
PF02096	3	0	0	1	0	0	0	0	0	0	2
PF02104	1	0	0	1	0	0	0	0	0	0	0
PF02109	1	0	0	0	0	0	1	0	0	0	0
PF02134	2	0	0	0	0	0	0	0	1	1	0
PF02135	1	0	0	0	0	0	0	0	0	1	0
PF02136	3	0	1	0	0	0	0	0	0	1	1
PF02138	2	0	0	1	0	0	0	0	0	0	1
PF02140	1	0	0	0	1	0	0	0	0	0	0
PF02142	2	0	0	0	0	0	0	0	0	0	2
PF02148	1	0	0	0	0	0	0	0	0	0	1
PF02150	1	0	1	0	0	0	0	0	0	0	0
PF02151	4	0	0	0	0	0	0	0	0	0	4
PF02153	1	0	0	0	0	0	0	0	0	0	1
PF02162	1	0	0	0	0	0	0	0	0	1	0
PF02163	5	0	0	0	0	0	0	0	0	0	5
PF02167	1	0	0	1	0	0	0	0	0	0	0
PF02170	5	0	5	0	0	0	0	0	0	0	0
PF02171	2	0	2	0	0	0	0	0	0	0	0
PF02176	1	0	0	0	0	0	0	0	0	0	1
PF02178	2	0	1	0	0	0	0	0	1	0	0
PF02179	1	0	0	1	0	0	0	0	0	0	0
PF02181	6	0	0	0	0	0	0	0	0	6	0
PF02182	5	0	5	0	0	0	0	0	0	0	0
PF02183	2	0	2	0	0	0	0	0	0	0	0
PF02184	1	0	1	0	0	0	0	0	0	0	0
PF02190	6	0	0	2	0	1	0	0	0	0	3
PF02195	1	0	0	0	0	0	0	0	0	0	1
PF02209	1	0	0	0	0	0	0	0	0	0	0
PF02212	4	0	0	0	0	0	0	0	0	4	0
PF02213	1	0	0	0	0	0	0	0	0	0	1
PF02221	3	0	0	0	3	0	0	0	0	0	0
PF02222	1	0	0	0	0	0	0	0	0	0	1
PF02225	13	5	0	1	3	0	0	1	0	3	0
PF02234	1	0	1	0	0	0	0	0	0	0	0
PF02254	3	0	0	0	0	0	0	0	0	0	3
PF02259	1	0	0	0	0	0	0	0	0	0	1
PF02260	1	0	0	0	0	0	0	0	0	0	1
PF02270	1	0	0	1	0	0	0	0	0	0	0
PF02271	2	0	0	2	0	0	0	0	0	0	0
PF02272	1	0	0	0	0	0	0	0	0	0	1
PF02296	2	0	0	0	0	0	0	0	0	2	0
PF02297	2	0	0	1	0	0	0	0	0	0	1
PF02298	9	2	0	0	0	0	0	0	0	7	0
PF02301	1	0	1	0	0	0	0	0	0	0	0
PF02309	8	0	8	0	0	0	0	0	0	0	0
PF02319	6	0	6	0	0	0	0	0	0	0	0
PF02320	1	0	0	1	0	0	0	0	0	0	0
PF02325	3	0	0	0	0	0	0	0	0	0	3
PF02326	1	0	0	1	0	0	0	0	0	0	0
PF02330	2	0	0	2	0	0	0	0	0	0	0
PF02338	1	0	0	0	0	0	0	0	0	1	0
PF02348	1	0	0	1	0	0	0	0	0	0	0
PF02353	2	0	0	0	0	0	0	0	0	1	1
PF02357	1	0	0	0	0	0	0	0	0	0	1
PF02358	1	0	0	1	0	0	0	0	0	0	0
PF02359	1	0	0	0	1	0	0	0	0	0	0
PF02361	1	0	0	0	0	0	0	0	0	0	1
PF02362	10	1	6	0	1	0	0	0	0	0	2
PF02364	6	0	0	0	0	0	0	0	0	6	0
PF02365	16	0	15	0	0	0	0	0	0	1	0
PF02373	2	0	2	0	0	0	0	0	0	0	0
PF02374	1	0	0	0	0	0	0	0	0	0	1
PF02375	2	0	2	0	0	0	0	0	0	0	0
PF02383	2	0	0	0	0	0	0	1	0	1	0
PF02386	1	0	0	0	0	0	0	0	0	1	0
PF02392	1	0	0	0	0	0	0	0	0	0	1
PF02401	1	0	0	0	0	0	0	0	0	0	1
PF02403	1	0	0	0	0	0	0	0	0	0	1
PF02405	1	0	0	0	0	0	0	0	0	0	1
PF02410	1	0	0	0	0	0	0	0	0	0	1
PF02416	2	0	0	0	0	0	0	0	0	0	2
PF02419	1	0	0	0	0	0	0	0	0	0	1
PF02423	1	0	0	0	0	0	0	0	0	0	1
PF02427	2	0	0	0	0	0	0	0	0	0	2
PF02431	2	0	0	0	0	0	0	0	0	0	2
PF02439	1	0	0	0	0	0	0	0	0	1	0
PF02445	1	0	0	0	0	0	0	0	0	0	1
PF02446	2	0	0	0	0	0	0	0	1	0	1
PF02453	8	0	0	1	0	0	1	0	0	6	0
PF02458	4	0	2	0	0	0	0	0	0	0	2
PF02460	2	0	0	0	1	0	0	0	0	1	0
PF02463	1	0	0	0	0	0	0	0	0	0	1
PF02466	7	0	0	3	0	0	0	0	0	0	4
PF02469	11	0	0	0	2	0	0	0	0	9	0
PF02470	1	0	0	0	0	0	0	0	0	0	1
PF02482	1	0	0	0	0	0	0	0	0	0	1
PF02492	1	0	0	0	0	0	0	0	0	0	1
PF02493	6	0	0	0	0	0	0	0	0	4	2
PF02502	1	0	1	0	0	0	0	0	0	0	0
PF02507	1	0	0	0	0	0	0	0	0	0	1
PF02514	1	0	0	0	0	0	0	0	0	0	1
PF02517	2	0	1	0	0	0	1	0	0	0	0
PF02518	13	0	5	3	1	0	1	0	0	1	2
PF02519	3	0	1	0	0	1	0	0	0	1	0
PF02531	2	0	0	0	0	0	0	0	0	0	2
PF02535	2	0	0	0	0	0	0	0	0	2	0
PF02536	2	0	0	0	0	0	0	0	0	0	2
PF02537	1	0	0	0	0	0	0	0	0	1	0
PF02542	1	0	0	0	0	0	0	0	0	0	1
PF02544	3	0	0	0	0	0	2	0	0	0	1
PF02545	1	0	0	0	0	0	0	0	0	0	1
PF02548	2	0	0	2	0	0	0	0	0	0	0
PF02551	1	0	0	0	0	1	0	0	0	0	0
PF02569	1	0	0	0	0	0	0	0	1	0	0
PF02574	1	0	0	0	0	0	0	0	0	1	0
PF02575	2	0	0	0	0	0	0	0	0	0	2
PF02581	2	0	0	0	0	0	0	0	0	0	2
PF02582	1	0	0	1	0	0	0	0	0	0	0
PF02602	1	0	0	0	0	0	0	0	0	0	1
PF02605	1	0	0	0	0	0	0	0	0	0	1
PF02622	2	0	0	0	0	0	0	0	0	0	2
PF02629	2	0	0	2	0	0	0	0	0	0	0
PF02637	1	0	0	0	0	0	0	0	0	0	1
PF02657	3	0	0	0	0	0	0	0	0	0	3
PF02666	3	0	0	1	1	0	1	0	0	0	0
PF02668	1	0	1	0	0	0	0	0	0	0	0
PF02670	1	0	0	0	0	0	0	0	0	0	1
PF02671	2	0	0	0	0	0	0	0	1	0	1
PF02672	4	0	0	0	0	0	0	0	0	0	4
PF02678	1	0	0	0	0	0	0	0	0	1	0
PF02696	1	0	0	0	0	0	0	0	0	0	1
PF02701	9	0	9	0	0	0	0	0	0	0	0
PF02705	6	0	0	0	0	0	0	0	0	5	1
PF02714	6	0	0	0	0	0	0	0	0	6	0
PF02727	2	0	0	0	1	1	0	0	0	0	0
PF02728	2	0	0	0	1	1	0	0	0	0	0
PF02729	2	0	0	0	0	0	0	0	0	0	2
PF02731	1	0	1	0	0	0	0	0	0	0	0
PF02732	1	0	1	0	0	0	0	0	0	0	0
PF02736	2	0	0	0	1	1	0	0	0	0	0
PF02737	1	0	0	0	0	1	0	0	0	0	0
PF02746	1	0	0	0	0	0	0	0	0	0	1
PF02747	1	0	1	0	0	0	0	0	0	0	0
PF02749	1	0	0	0	0	0	0	0	0	0	1
PF02769	1	0	0	0	0	0	0	0	0	0	1
PF02770	3	0	0	1	0	2	0	0	0	0	0
PF02771	2	0	0	1	0	1	0	0	0	0	0
PF02772	4	0	1	0	0	0	0	0	0	3	0
PF02773	4	0	1	0	0	0	0	0	0	3	0
PF02774	2	0	0	0	0	0	0	0	0	0	2
PF02775	1	0	0	0	0	0	0	0	0	0	1
PF02776	1	0	0	0	0	0	0	0	0	0	1
PF02777	4	0	0	1	0	0	0	0	0	0	3
PF02779	8	0	0	3	0	0	0	0	0	0	5
PF02780	6	0	0	1	0	0	0	0	0	0	5
PF02781	2	0	0	0	0	0	0	0	0	0	2
PF02782	3	0	0	0	0	0	0	0	1	0	2
PF02784	1	0	0	0	0	0	0	0	0	0	1
PF02785	3	0	0	1	0	0	0	0	0	1	1
PF02786	4	0	0	1	0	0	0	0	0	1	2
PF02787	1	0	0	0	0	0	0	0	0	0	1
PF02788	1	0	0	0	0	0	0	0	0	0	1
PF02789	2	0	0	0	1	0	0	0	0	0	1
PF02791	1	0	0	0	0	0	0	0	0	0	1
PF02792	1	0	1	0	0	0	0	0	0	0	0
PF02797	2	0	0	0	0	0	2	0	0	0	0
PF02798	10	0	0	2	0	1	0	0	0	4	3
PF02799	1	0	0	0	0	0	0	0	1	0	0
PF02800	5	0	0	0	0	0	0	0	0	0	5
PF02801	2	0	0	0	0	0	0	0	0	0	2
PF02803	1	0	0	0	0	1	0	0	0	0	0
PF02806	4	0	0	0	0	0	0	0	0	0	4
PF02809	1	0	0	0	0	0	0	0	1	0	0
PF02812	3	0	0	3	0	0	0	0	0	0	0
PF02815	1	0	0	0	0	0	1	0	0	0	0
PF02817	6	0	0	4	0	0	0	0	0	0	2
PF02823	2	0	0	1	0	0	0	0	0	0	1
PF02824	1	0	0	0	0	0	0	0	0	0	1
PF02825	1	0	1	0	0	0	0	0	0	0	0
PF02826	2	0	0	1	0	1	0	0	0	0	0
PF02836	1	0	0	0	0	0	0	0	0	0	1
PF02837	2	0	0	0	1	0	0	0	0	0	1
PF02838	3	0	0	0	1	0	0	0	0	2	0
PF02843	1	0	0	0	0	0	0	0	0	0	1
PF02844	1	0	0	0	0	0	0	0	0	0	1
PF02845	1	0	0	0	0	0	0	0	0	1	0
PF02847	1	0	1	0	0	0	0	0	0	0	0
PF02852	6	0	0	2	0	1	0	0	0	0	3
PF02854	2	0	2	0	0	0	0	0	0	0	0
PF02861	8	0	0	0	0	0	0	0	0	0	8
PF02862	1	0	0	0	1	0	0	0	0	0	0
PF02866	6	0	0	1	0	1	0	0	0	2	2
PF02874	5	0	0	3	0	0	0	0	0	0	2
PF02875	1	0	0	0	0	0	0	0	0	0	1
PF02877	1	0	1	0	0	0	0	0	0	0	0
PF02878	3	0	0	0	0	0	0	0	0	0	3
PF02879	3	0	0	0	0	0	0	0	0	0	3
PF02880	1	0	0	0	0	0	0	0	0	0	1
PF02881	3	0	0	0	0	0	1	0	0	0	2
PF02882	2	0	0	0	0	0	0	0	0	0	2
PF02883	4	0	0	0	0	0	0	0	0	4	0
PF02885	1	0	0	0	0	0	0	0	0	0	1
PF02887	6	0	0	1	0	0	0	0	0	2	3
PF02889	2	0	1	0	0	0	1	0	0	0	0
PF02891	1	0	1	0	0	0	0	0	0	0	0
PF02896	1	0	0	0	0	0	0	0	0	0	1
PF02897	2	0	0	0	0	0	0	0	0	0	2
PF02902	4	0	3	0	0	0	0	0	0	0	1
PF02910	3	0	0	2	0	0	0	0	0	0	1
PF02913	2	0	0	2	0	0	0	0	0	0	0
PF02915	1	0	0	0	0	0	0	0	0	0	1
PF02921	2	0	0	2	0	0	0	0	0	0	0
PF02922	6	0	0	0	0	0	0	0	0	0	6
PF02929	1	0	0	0	0	0	0	0	0	0	1
PF02933	1	0	0	0	1	0	0	0	0	0	0
PF02934	1	0	0	0	0	0	0	0	0	0	1
PF02938	1	0	0	0	0	0	0	0	0	0	1
PF02941	2	0	0	0	0	0	0	0	0	0	2
PF02943	1	0	0	0	0	0	0	0	0	0	1
PF02953	4	0	0	4	0	0	0	0	0	0	0
PF02966	1	0	1	0	0	0	0	0	0	0	0
PF02978	1	0	0	0	0	0	0	0	0	0	1
PF02984	4	0	3	0	0	0	0	0	0	1	0
PF02985	16	0	1	1	0	0	0	0	1	9	2
PF02990	5	0	0	0	0	0	0	5	0	0	0
PF02991	2	0	0	0	2	0	0	0	0	0	0
PF03000	5	0	0	0	0	0	0	0	0	5	0
PF03005	2	0	0	0	1	0	0	0	0	0	1
PF03007	1	0	0	0	0	0	1	0	0	0	0
PF03009	3	0	0	0	1	0	0	0	0	2	0
PF03015	2	0	0	0	0	0	1	0	0	0	1
PF03016	6	0	0	0	0	0	0	6	0	0	0
PF03029	2	0	0	0	0	0	0	0	0	0	0
PF03030	2	0	0	0	1	0	0	1	0	0	0
PF03031	4	0	3	1	0	0	0	0	0	0	0
PF03033	1	0	0	0	0	0	0	0	0	1	0
PF03055	8	0	0	0	0	0	0	0	0	1	7
PF03061	4	0	0	0	0	4	0	0	0	0	0
PF03062	2	0	0	0	0	0	0	0	0	1	1
PF03069	1	0	0	0	1	0	0	0	0	0	0
PF03071	1	0	0	0	0	0	0	1	0	0	0
PF03080	1	0	0	0	0	0	0	0	0	0	1
PF03081	4	0	0	0	0	0	0	0	0	4	0
PF03083	2	0	0	0	0	0	0	0	0	1	1
PF03088	4	0	0	0	0	0	3	0	0	1	0
PF03091	1	0	0	0	0	0	0	0	0	0	1
PF03092	1	0	0	0	0	0	0	0	0	0	1
PF03094	4	0	0	0	0	0	0	0	0	4	0
PF03099	1	0	0	1	0	0	0	0	0	0	0
PF03101	2	0	2	0	0	0	0	0	0	0	0
PF03104	1	1	0	0	0	0	0	0	0	0	0
PF03105	6	0	3	0	1	0	0	0	0	2	0
PF03106	11	0	9	0	0	0	0	0	0	1	1
PF03107	2	0	1	0	0	0	0	0	0	0	1
PF03109	8	0	0	0	0	0	0	0	0	0	8
PF03110	1	0	0	0	0	0	0	0	0	1	0
PF03118	1	0	0	0	0	0	0	0	0	0	1
PF03124	2	0	0	0	0	0	0	0	0	2	0
PF03126	1	0	1	0	0	0	0	0	0	0	0
PF03127	4	0	0	0	0	0	0	0	0	4	0
PF03129	4	0	0	1	0	0	0	0	0	0	3
PF03130	1	0	0	1	0	0	0	0	0	0	0
PF03133	1	0	0	0	0	0	0	0	0	0	1
PF03138	11	0	1	0	0	0	0	6	0	0	4
PF03140	3	0	0	0	0	0	0	0	0	3	0
PF03141	13	0	0	0	0	0	0	12	0	1	0
PF03143	3	0	0	1	1	0	0	0	0	0	1
PF03144	11	0	1	3	1	0	0	0	0	1	5
PF03145	2	0	0	1	0	0	0	0	0	1	0
PF03147	1	0	0	0	0	0	0	0	0	0	1
PF03151	8	0	0	0	0	0	0	3	0	3	2
PF03159	3	0	3	0	0	0	0	0	0	0	0
PF03167	1	0	0	1	0	0	0	0	0	0	0
PF03168	2	0	0	0	0	0	0	0	0	2	0
PF03169	8	0	0	0	0	0	0	0	0	8	0
PF03171	5	0	2	0	0	2	0	0	0	1	0
PF03178	4	0	3	0	0	0	0	0	0	0	1
PF03179	2	0	0	0	2	0	0	0	0	0	0
PF03181	1	0	0	0	1	0	0	0	0	0	0
PF03188	1	0	0	0	1	0	0	0	0	0	0
PF03190	1	0	0	0	0	0	0	0	0	0	1
PF03195	5	0	4	1	0	0	0	0	0	0	0
PF03200	1	0	0	0	0	0	1	0	0	0	0
PF03208	18	0	0	0	0	0	18	0	0	0	0
PF03214	1	0	0	0	0	0	0	1	0	0	0
PF03219	2	0	0	0	0	0	0	0	0	0	2
PF03223	1	0	0	0	1	0	0	0	0	0	0
PF03227	1	0	0	0	1	0	0	0	0	0	0
PF03244	2	0	0	0	0	0	0	0	0	0	2
PF03248	1	0	0	0	0	0	0	1	0	0	0
PF03255	1	0	0	0	0	0	0	0	0	0	1
PF03271	2	0	0	0	0	0	0	0	0	0	0
PF03297	2	0	0	0	0	0	0	0	2	0	0
PF03321	5	0	1	0	1	0	0	0	0	0	3
PF03330	1	0	0	0	0	0	0	0	0	0	1
PF03343	1	0	1	0	0	0	0	0	0	0	0
PF03350	1	0	0	0	0	0	0	0	0	0	1
PF03357	3	0	0	0	0	0	0	0	0	3	0
PF03358	1	0	0	0	0	0	0	0	0	0	1
PF03360	1	0	0	0	0	0	0	1	0	0	0
PF03364	3	0	0	1	0	0	0	0	0	0	2
PF03368	2	0	2	0	0	0	0	0	0	0	0
PF03372	5	0	2	0	0	0	0	0	0	1	2
PF03381	2	0	0	0	0	0	0	1	0	1	0
PF03386	1	0	0	1	0	0	0	0	0	0	0
PF03398	1	0	0	1	0	0	0	0	0	0	0
PF03399	1	0	0	0	0	0	0	0	0	0	1
PF03404	1	0	0	0	0	1	0	0	0	0	0
PF03405	2	0	0	0	0	0	0	0	0	0	2
PF03435	2	0	0	0	0	0	0	0	1	0	1
PF03441	1	0	1	0	0	0	0	0	0	0	0
PF03446	5	0	1	0	0	1	0	0	1	0	2
PF03447	2	0	0	0	0	0	0	0	0	0	2
PF03460	2	0	0	0	0	0	0	0	0	0	2
PF03462	1	0	0	0	0	0	0	0	0	0	1
PF03463	1	0	0	0	0	0	0	0	0	1	0
PF03464	1	0	0	0	0	0	0	0	0	1	0
PF03465	1	0	0	0	0	0	0	0	0	1	0
PF03468	1	0	0	1	0	0	0	0	0	0	0
PF03469	1	0	0	1	0	0	0	0	0	0	0
PF03478	1	0	0	0	0	0	0	0	0	0	1
PF03479	5	0	4	0	0	0	0	0	1	0	0
PF03485	1	0	0	0	0	0	0	0	0	0	1
PF03489	3	0	0	0	3	0	0	0	0	0	0
PF03501	2	0	0	0	0	0	0	0	2	0	0
PF03514	8	0	8	0	0	0	0	0	0	0	0
PF03531	1	0	1	0	0	0	0	0	0	0	0
PF03547	6	0	0	0	0	0	1	0	0	5	0
PF03552	10	0	0	0	0	0	0	3	0	6	1
PF03572	1	0	0	0	0	0	0	0	0	0	1
PF03595	4	0	0	0	0	0	0	0	0	4	0
PF03618	2	0	0	0	0	0	0	0	1	0	1
PF03634	4	0	3	0	0	0	0	0	0	0	1
PF03635	1	0	0	0	0	0	0	0	0	0	0
PF03637	3	0	3	0	0	0	0	0	0	0	0
PF03638	1	0	1	0	0	0	0	0	0	0	0
PF03643	1	0	0	0	0	0	0	0	0	0	0
PF03647	5	0	1	1	0	0	0	0	0	0	3
PF03649	1	0	0	0	0	0	0	0	0	1	0
PF03650	4	0	0	3	0	0	0	0	0	1	0
PF03651	1	0	0	0	0	0	0	0	0	0	1
PF03665	1	0	0	0	0	0	1	0	0	0	0
PF03690	1	0	0	1	0	0	0	0	0	0	0
PF03715	1	0	1	0	0	0	0	0	0	0	0
PF03719	6	0	0	0	0	0	0	1	4	0	1
PF03725	3	0	2	0	0	0	0	0	0	0	1
PF03726	1	0	0	0	0	0	0	0	0	0	1
PF03727	5	0	0	4	0	0	0	0	0	0	1
PF03741	1	0	0	0	0	0	0	0	0	0	1
PF03759	2	0	0	0	0	0	0	0	0	2	0
PF03763	6	0	1	0	0	0	0	0	0	5	0
PF03764	4	0	1	2	0	0	0	0	0	0	1
PF03765	7	0	0	0	0	0	0	0	0	6	1
PF03766	2	0	0	0	0	0	0	0	0	2	0
PF03767	2	0	0	0	2	0	0	0	0	0	0
PF03770	1	0	1	0	0	0	0	0	0	0	0
PF03776	1	0	0	0	0	0	0	0	0	0	1
PF03789	4	0	4	0	0	0	0	0	0	0	0
PF03790	5	0	5	0	0	0	0	0	0	0	0
PF03791	5	0	5	0	0	0	0	0	0	0	0
PF03798	1	0	0	0	0	0	1	0	0	0	0
PF03800	1	0	0	0	0	0	0	0	0	1	0
PF03810	3	0	2	0	0	0	0	0	0	0	1
PF03822	6	0	2	0	2	0	0	0	0	2	0
PF03835	1	0	0	0	0	0	0	0	0	0	1
PF03839	1	0	0	0	0	0	0	0	0	1	0
PF03847	1	0	1	0	0	0	0	0	0	0	0
PF03859	1	0	0	0	0	0	0	0	1	0	0
PF03874	1	0	1	0	0	0	0	0	0	0	0
PF03878	1	0	0	0	0	0	1	0	0	0	0
PF03881	1	0	0	0	0	0	0	0	0	0	1
PF03893	1	0	0	0	0	0	0	0	0	1	0
PF03909	1	0	0	0	0	0	0	0	0	0	1
PF03911	1	0	0	0	0	0	0	0	0	1	0
PF03912	1	0	0	0	0	0	0	0	0	0	1
PF03914	1	0	1	0	0	0	0	0	0	0	0
PF03918	1	0	0	1	0	0	0	0	0	0	0
PF03924	1	0	0	0	0	0	0	0	0	1	0
PF03931	2	0	2	0	0	0	0	0	0	0	0
PF03936	3	0	0	0	0	1	0	0	0	0	2
PF03939	1	0	0	0	0	0	0	0	1	0	0
PF03946	3	0	0	0	0	0	0	0	2	0	1
PF03947	2	0	0	0	0	0	0	0	1	0	1
PF03948	1	0	0	0	0	0	0	0	0	0	1
PF03949	3	0	0	2	0	0	0	0	0	0	1
PF03951	3	0	0	0	0	0	0	0	0	1	2
PF03952	2	0	1	0	0	0	0	0	0	0	1
PF03953	12	0	0	0	1	0	0	0	2	6	3
PF03959	1	0	0	0	0	1	0	0	0	0	0
PF03981	1	0	0	1	0	0	0	0	0	0	0
PF03989	1	0	0	0	0	0	0	0	0	0	1
PF03999	5	0	0	0	0	0	0	0	0	0	0
PF04003	1	0	1	0	0	0	0	0	0	0	0
PF04004	1	0	0	0	0	0	0	0	1	0	0
PF04006	1	0	1	0	0	0	0	0	0	0	0
PF04012	1	0	0	0	0	0	0	0	0	0	1
PF04030	1	0	0	1	0	0	0	0	0	0	0
PF04042	1	0	0	1	0	0	0	0	0	0	0
PF04043	5	1	0	0	1	0	0	0	0	3	0
PF04048	1	0	0	0	0	0	0	0	0	1	0
PF04053	1	0	0	0	0	0	0	0	0	1	0
PF04055	1	0	0	0	0	0	1	0	0	0	0
PF04057	1	0	1	0	0	0	0	0	0	0	0
PF04059	1	0	1	0	0	0	0	0	0	0	0
PF04086	1	0	0	0	0	0	1	0	0	0	0
PF04091	1	0	0	0	0	0	0	0	0	1	0
PF04096	1	0	1	0	0	0	0	0	0	0	0
PF04097	1	0	1	0	0	0	0	0	0	0	0
PF04100	1	0	0	1	0	0	0	0	0	0	0
PF04101	1	0	0	0	0	0	0	0	0	0	1
PF04107	1	0	0	0	0	0	0	0	0	0	1
PF04113	1	0	0	0	0	0	1	0	0	0	0
PF04114	1	0	0	0	0	0	1	0	0	0	0
PF04116	3	0	0	0	0	0	1	0	0	1	1
PF04117	3	0	0	0	0	1	0	0	0	0	2
PF04129	1	0	0	0	0	0	0	1	0	0	0
PF04133	2	0	0	0	2	0	0	0	0	0	0
PF04134	1	0	0	0	0	0	0	0	0	0	1
PF04135	1	0	1	0	0	0	0	0	0	0	0
PF04137	2	0	0	0	0	0	2	0	0	0	0
PF04140	2	0	0	0	0	0	2	0	0	0	0
PF04144	3	0	0	0	0	0	0	0	0	3	0
PF04145	2	0	0	0	1	0	0	0	0	1	0
PF04146	3	0	3	0	0	0	0	0	0	0	0
PF04153	1	0	1	0	0	0	0	0	0	0	0
PF04161	2	0	0	0	0	0	2	0	0	0	0
PF04172	1	0	0	0	0	0	0	0	0	0	1
PF04185	3	0	0	0	1	0	0	0	1	1	0
PF04187	1	0	0	0	0	0	0	0	0	0	1
PF04193	1	0	0	0	0	0	0	0	0	1	0
PF04212	1	0	0	0	0	0	0	0	0	0	0
PF04253	1	0	0	0	1	0	0	0	0	0	0
PF04258	3	0	0	0	0	0	1	0	0	2	0
PF04263	2	0	0	0	0	0	0	0	2	0	0
PF04265	2	0	0	0	0	0	0	0	2	0	0
PF04278	1	0	0	0	0	0	0	0	0	0	1
PF04280	1	0	0	1	0	0	0	0	0	0	0
PF04389	1	0	0	0	1	0	0	0	0	0	0
PF04396	3	0	0	2	0	0	0	0	0	0	1
PF04398	6	1	1	0	4	0	0	0	0	0	0
PF04406	2	0	2	0	0	0	0	0	0	0	0
PF04408	3	0	2	0	0	0	0	0	0	0	1
PF04410	1	0	0	0	0	0	0	0	0	0	1
PF04418	2	0	0	2	0	0	0	0	0	0	0
PF04427	2	0	2	0	0	0	0	0	0	0	0
PF04433	4	0	4	0	0	0	0	0	0	0	0
PF04434	2	0	2	0	0	0	0	0	0	0	0
PF04438	1	0	1	0	0	0	0	0	0	0	0
PF04455	1	0	0	0	0	0	0	0	1	0	0
PF04499	1	0	0	0	0	0	0	0	0	1	0
PF04503	1	0	1	0	0	0	0	0	0	0	0
PF04504	2	0	2	0	0	0	0	0	0	0	0
PF04515	1	0	0	0	0	0	0	0	0	1	0
PF04520	1	0	0	0	0	0	0	0	0	0	1
PF04525	2	0	0	0	0	0	0	0	0	1	1
PF04526	3	0	0	0	0	0	0	0	0	3	0
PF04535	6	0	0	0	0	0	0	0	0	6	0
PF04536	1	0	0	0	0	0	0	0	0	0	1
PF04539	4	0	0	0	0	0	0	0	0	0	4
PF04542	4	0	0	0	0	0	0	0	0	0	4
PF04545	4	0	0	0	0	0	0	0	0	0	4
PF04548	6	0	0	0	0	0	0	0	0	1	5
PF04551	1	0	0	0	0	0	0	0	0	0	1
PF04560	2	0	1	0	0	0	0	0	0	0	1
PF04561	2	0	1	0	0	0	0	0	0	0	1
PF04563	2	0	1	0	0	0	0	0	0	0	1
PF04564	7	0	1	0	0	0	0	0	2	3	1
PF04565	2	0	1	0	0	0	0	0	0	0	1
PF04566	1	0	1	0	0	0	0	0	0	0	0
PF04567	1	0	1	0	0	0	0	0	0	0	0
PF04571	1	1	0	0	0	0	0	0	0	0	0
PF04573	1	0	0	0	0	0	1	0	0	0	0
PF04578	2	0	0	0	0	0	0	0	0	2	0
PF04597	2	0	0	0	0	0	1	0	0	1	0
PF04601	1	0	0	0	1	0	0	0	0	0	0
PF04607	4	0	0	0	0	0	0	0	0	0	4
PF04618	1	0	1	0	0	0	0	0	0	0	0
PF04627	1	0	0	1	0	0	0	0	0	0	0
PF04642	1	0	1	0	0	0	0	0	0	0	0
PF04646	1	0	0	0	0	0	0	1	0	0	0
PF04654	1	0	0	0	0	0	0	0	0	1	0
PF04685	3	0	0	0	2	0	0	0	0	1	0
PF04690	1	0	1	0	0	0	0	0	0	0	0
PF04715	2	0	0	0	0	0	0	0	0	0	2
PF04716	1	0	0	1	0	0	0	0	0	0	0
PF04718	1	0	0	1	0	0	0	0	0	0	0
PF04720	2	0	1	0	0	0	0	0	0	0	1
PF04722	1	0	0	0	0	0	0	0	0	0	1
PF04725	1	0	0	0	0	0	0	0	0	0	1
PF04733	1	0	0	0	0	0	0	0	0	1	0
PF04734	1	0	0	0	0	0	0	0	0	1	0
PF04749	6	0	0	0	1	0	0	0	0	5	0
PF04755	10	0	0	0	0	0	0	0	0	0	10
PF04757	2	0	0	0	0	2	0	0	0	0	0
PF04758	2	0	0	0	0	0	0	0	2	0	0
PF04760	1	0	0	0	0	0	0	0	0	0	1
PF04765	1	0	0	0	0	0	0	1	0	0	0
PF04774	2	0	1	0	0	0	0	0	0	1	0
PF04777	1	0	0	0	0	0	0	1	0	0	0
PF04780	2	0	1	1	0	0	0	0	0	0	0
PF04781	2	0	1	1	0	0	0	0	0	0	0
PF04782	4	0	0	0	0	0	0	0	0	4	0
PF04783	4	0	0	0	0	0	0	0	0	4	0
PF04784	3	0	0	0	1	0	0	0	0	0	2
PF04788	1	0	0	0	0	0	0	0	0	1	0
PF04800	1	0	0	1	0	0	0	0	0	0	0
PF04818	1	0	1	0	0	0	0	0	0	0	0
PF04824	1	0	1	0	0	0	0	0	0	0	0
PF04825	1	0	1	0	0	0	0	0	0	0	0
PF04832	3	0	0	0	0	0	0	0	0	1	2
PF04833	3	0	0	0	0	0	0	0	0	3	0
PF04836	1	0	1	0	0	0	0	0	0	0	0
PF04839	1	0	0	0	0	0	0	0	0	0	1
PF04840	1	0	0	0	1	0	0	0	0	0	0
PF04841	1	0	0	0	1	0	0	0	0	0	0
PF04844	1	0	0	0	0	0	0	0	0	1	0
PF04851	2	0	1	0	0	0	0	0	0	1	0
PF04852	1	0	1	0	0	0	0	0	0	0	0
PF04853	2	0	0	0	0	0	0	0	1	0	1
PF04855	1	0	1	0	0	0	0	0	0	0	0
PF04859	2	0	0	0	0	1	0	0	0	1	0
PF04862	1	0	0	0	0	0	0	0	0	1	0
PF04873	1	0	1	0	0	0	0	0	0	0	0
PF04884	1	0	0	0	0	0	0	0	0	0	1
PF04885	1	1	0	0	0	0	0	0	0	0	0
PF04893	1	0	0	0	0	0	0	0	0	1	0
PF04898	3	0	0	0	0	0	0	0	0	0	3
PF04909	1	0	0	0	0	0	0	0	0	0	1
PF04921	1	0	1	0	0	0	0	0	0	0	0
PF04926	3	0	3	0	0	0	0	0	0	0	0
PF04927	1	0	1	0	0	0	0	0	0	0	0
PF04928	3	0	3	0	0	0	0	0	0	0	0
PF04939	1	0	1	0	0	0	0	0	0	0	0
PF04949	3	0	0	0	0	0	0	0	0	3	0
PF04969	4	0	1	0	0	0	0	0	0	2	1
PF04982	1	0	0	0	0	0	0	0	0	0	1
PF04983	5	0	3	0	0	0	0	0	0	0	2
PF04987	1	0	0	0	0	0	1	0	0	0	0
PF04997	3	0	2	0	0	0	0	0	0	0	1
PF04998	3	0	2	0	0	0	0	0	0	0	1
PF05000	3	0	2	0	0	0	0	0	0	0	1
PF05002	2	0	1	0	0	0	0	0	0	1	0
PF05003	1	0	0	0	0	0	0	0	0	1	0
PF05004	1	0	1	0	0	0	0	0	0	0	0
PF05008	3	0	0	0	0	0	0	0	0	3	0
PF05022	1	0	1	0	0	0	0	0	0	0	0
PF05033	5	0	5	0	0	0	0	0	0	0	0
PF05042	1	1	0	0	0	0	0	0	0	0	0
PF05055	4	0	0	0	0	1	0	0	0	3	0
PF05071	1	0	0	1	0	0	0	0	0	0	0
PF05078	1	0	0	0	0	0	0	0	0	0	1
PF05089	1	0	0	0	1	0	0	0	0	0	0
PF05116	5	0	1	0	0	0	0	0	0	4	0
PF05147	1	0	0	0	0	0	0	0	0	1	0
PF05158	1	0	0	0	0	0	0	0	0	0	1
PF05162	4	0	0	0	0	0	0	0	4	0	0
PF05173	1	0	0	0	0	0	0	0	0	0	1
PF05175	1	0	1	0	0	0	0	0	0	0	0
PF05178	1	0	0	0	0	0	0	0	1	0	0
PF05183	2	0	2	0	0	0	0	0	0	0	0
PF05184	3	0	0	0	3	0	0	0	0	0	0
PF05187	1	0	0	1	0	0	0	0	0	0	0
PF05188	1	0	0	0	0	0	0	0	0	1	0
PF05190	2	0	1	0	0	0	0	0	0	1	0
PF05191	2	0	0	2	0	0	0	0	0	0	0
PF05192	3	0	2	0	0	0	0	0	0	1	0
PF05193	7	0	0	3	0	0	0	0	0	0	4
PF05198	2	0	0	0	0	0	0	0	0	0	2
PF05199	1	0	0	0	0	0	1	0	0	0	0
PF05201	1	0	0	0	0	0	0	0	0	0	1
PF05208	1	0	0	0	0	0	1	0	0	0	0
PF05221	1	0	0	0	0	0	0	0	0	1	0
PF05222	1	0	0	0	0	0	0	0	1	0	0
PF05239	1	0	0	0	0	0	0	0	0	0	1
PF05241	1	0	0	0	0	0	0	0	0	1	0
PF05266	1	0	0	0	1	0	0	0	0	0	0
PF05278	1	0	0	0	0	0	0	0	0	1	0
PF05292	1	0	0	0	0	1	0	0	0	0	0
PF05340	2	0	0	0	0	0	0	0	0	2	0
PF05347	1	0	0	1	0	0	0	0	0	0	0
PF05362	3	0	0	2	0	1	0	0	0	0	0
PF05365	1	0	0	1	0	0	0	0	0	0	0
PF05368	4	0	0	0	0	0	0	0	0	1	3
PF05383	1	0	1	0	0	0	0	0	0	0	0
PF05405	1	0	0	1	0	0	0	0	0	0	0
PF05406	1	0	1	0	0	0	0	0	0	0	0
PF05419	1	0	0	0	0	0	0	0	0	0	1
PF05462	1	0	0	0	0	0	0	0	0	1	0
PF05479	1	0	0	0	0	0	0	0	0	0	1
PF05493	2	0	0	0	2	0	0	0	0	0	0
PF05514	4	0	0	0	0	0	4	0	0	0	0
PF05542	1	0	0	0	0	0	0	0	0	0	1
PF05558	2	0	0	0	0	0	0	0	0	2	0
PF05562	3	0	0	0	1	0	0	0	0	1	1
PF05577	1	0	0	0	1	0	0	0	0	0	0
PF05602	1	0	0	0	0	0	1	0	0	0	0
PF05605	1	0	1	0	0	0	0	0	0	0	0
PF05620	1	0	0	0	0	0	0	0	0	1	0
PF05627	3	0	0	0	0	0	0	0	0	3	0
PF05631	2	0	0	0	0	0	0	0	0	2	0
PF05637	3	0	0	0	0	0	0	3	0	0	0
PF05641	1	0	0	0	1	0	0	0	0	0	0
PF05648	3	0	0	0	0	3	0	0	0	0	0
PF05653	1	0	0	0	0	0	0	0	0	1	0
PF05676	1	0	0	1	0	0	0	0	0	0	0
PF05678	2	0	2	0	0	0	0	0	0	0	0
PF05684	1	0	0	0	0	0	0	0	0	0	1
PF05687	1	0	0	0	1	0	0	0	0	0	0
PF05691	2	0	0	0	0	0	0	0	0	0	2
PF05695	1	0	0	0	0	0	0	0	0	0	1
PF05697	1	0	0	0	0	0	0	0	0	0	1
PF05698	1	0	0	0	0	0	0	0	0	0	1
PF05700	1	0	1	0	0	0	0	0	0	0	0
PF05701	2	0	0	0	0	0	0	0	0	2	0
PF05703	1	0	0	0	0	0	0	0	0	1	0
PF05705	1	0	0	0	0	1	0	0	0	0	0
PF05721	1	0	0	0	0	0	0	0	0	1	0
PF05724	2	0	0	0	0	0	0	0	0	1	1
PF05726	1	0	0	0	0	0	0	0	0	1	0
PF05739	14	0	1	0	3	0	0	2	0	7	0
PF05743	1	0	0	0	0	0	0	0	0	0	0
PF05746	1	0	0	0	0	0	0	0	0	0	1
PF05753	1	0	0	0	0	0	0	0	0	1	0
PF05755	2	0	0	0	2	0	0	0	0	0	0
PF05757	4	0	0	0	0	0	0	0	0	0	4
PF05758	1	0	0	0	0	0	0	0	0	0	1
PF05761	1	0	0	0	0	0	0	0	0	0	1
PF05770	1	0	1	0	0	0	0	0	0	0	0
PF05799	1	0	0	1	0	0	0	0	0	0	0
PF05859	1	0	1	0	0	0	0	0	0	0	0
PF05875	1	0	0	0	0	0	1	0	0	0	0
PF05879	2	0	0	0	0	0	1	0	0	1	0
PF05899	2	0	0	0	0	0	0	0	0	0	2
PF05903	1	0	0	0	0	0	0	0	0	1	0
PF05910	1	0	0	0	0	0	0	0	0	1	0
PF05911	3	0	0	0	0	0	0	0	0	3	0
PF05922	7	5	0	0	0	0	0	0	0	2	0
PF05971	1	0	1	0	0	0	0	0	0	0	0
PF05996	1	0	0	0	0	0	0	0	0	0	1
PF06017	1	0	0	0	0	0	0	0	0	1	0
PF06026	2	0	0	0	0	0	0	0	0	0	2
PF06045	1	0	0	0	0	0	0	0	0	1	0
PF06046	1	0	0	0	0	0	0	0	0	1	0
PF06068	2	0	1	0	0	0	0	0	0	0	1
PF06071	1	0	0	0	0	0	0	0	0	0	1
PF06094	2	0	0	0	0	0	0	0	0	2	0
PF06136	2	0	0	0	0	0	0	0	0	2	0
PF06148	1	0	0	0	1	0	0	0	0	0	0
PF06200	4	0	4	0	0	0	0	0	0	0	0
PF06203	7	0	6	0	0	0	0	0	0	1	0
PF06206	1	0	0	0	0	0	0	0	0	0	1
PF06212	2	0	0	2	0	0	0	0	0	0	0
PF06217	7	0	7	0	0	0	0	0	0	0	0
PF06219	1	0	0	0	0	0	0	0	0	1	0
PF06232	1	0	0	0	0	0	0	0	0	1	0
PF06241	2	0	0	0	0	0	0	0	0	0	2
PF06246	1	0	0	0	0	0	0	0	0	0	1
PF06258	1	0	0	1	0	0	0	0	0	0	0
PF06351	3	0	0	0	0	0	0	0	0	1	2
PF06364	1	0	0	0	0	0	0	1	0	0	0
PF06404	1	1	0	0	0	0	0	0	0	0	0
PF06405	1	0	0	0	0	0	0	0	0	0	1
PF06421	1	0	0	0	0	0	0	0	0	0	1
PF06424	1	0	1	0	0	0	0	0	0	0	0
PF06426	4	0	0	1	0	0	0	0	3	0	0
PF06427	1	0	0	0	0	0	1	0	0	0	0
PF06449	1	0	0	1	0	0	0	0	0	0	0
PF06455	1	0	0	1	0	0	0	0	0	0	0
PF06461	1	0	1	0	0	0	0	0	0	0	0
PF06465	1	0	1	0	0	0	0	0	0	0	0
PF06470	1	0	0	0	0	0	0	0	0	0	1
PF06472	2	0	0	0	0	1	0	0	0	0	1
PF06479	1	0	0	0	0	0	1	0	0	0	0
PF06480	13	0	0	3	0	0	0	0	0	0	10
PF06485	1	0	0	0	0	0	0	0	0	0	1
PF06487	1	0	1	0	0	0	0	0	0	0	0
PF06507	3	0	3	0	0	0	0	0	0	0	0
PF06522	1	0	0	0	0	1	0	0	0	0	0
PF06549	2	0	0	0	0	0	0	0	0	0	2
PF06552	3	0	0	3	0	0	0	0	0	0	0
PF06592	1	0	0	1	0	0	0	0	0	0	0
PF06596	1	0	0	0	0	0	0	0	0	0	1
PF06695	1	0	0	0	0	0	0	0	0	0	1
PF06697	2	0	0	0	0	0	0	0	0	2	0
PF06703	1	0	0	0	0	0	1	0	0	0	0
PF06728	1	0	0	0	0	0	0	0	0	1	0
PF06733	3	0	0	2	0	0	0	0	0	0	1
PF06749	3	0	0	0	0	0	0	0	0	3	0
PF06803	1	0	0	0	0	0	0	0	0	1	0
PF06807	1	0	1	0	0	0	0	0	0	0	0
PF06813	2	0	1	0	0	0	0	0	0	1	0
PF06814	2	0	0	0	1	0	0	1	0	0	0
PF06827	1	0	0	0	0	0	0	0	0	0	1
PF06886	2	0	0	0	0	0	0	0	0	0	1
PF06911	1	0	0	0	0	0	0	0	0	1	0
PF06916	1	0	0	0	0	0	0	0	0	0	1
PF06925	3	0	0	0	0	0	0	0	0	0	3
PF06955	2	0	0	0	0	0	0	0	0	2	0
PF06957	1	0	0	0	0	0	0	0	0	1	0
PF06962	1	0	0	0	0	0	0	0	0	0	1
PF06963	1	0	0	0	1	0	0	0	0	0	0
PF06966	2	0	0	0	0	0	0	0	0	2	0
PF06974	1	0	0	0	0	0	1	0	0	0	0
PF06991	1	0	0	0	0	0	0	0	0	0	1
PF07002	4	0	0	0	0	0	0	0	0	4	0
PF07011	1	0	1	0	0	0	0	0	0	0	0
PF07036	1	0	0	0	0	0	0	0	0	0	1
PF07039	1	0	1	0	0	0	0	0	0	0	0
PF07058	3	0	0	0	0	0	0	0	0	2	0
PF07059	5	0	0	0	0	0	0	0	0	5	0
PF07082	2	0	0	0	0	0	0	0	0	0	2
PF07109	1	0	0	0	0	0	0	0	0	0	1
PF07123	1	0	0	0	0	0	0	0	0	0	1
PF07137	1	0	0	0	0	0	0	0	0	0	1
PF07168	2	0	0	0	0	0	0	0	0	1	1
PF07173	2	0	0	0	0	0	0	0	0	2	0
PF07207	1	0	0	0	0	0	0	0	0	0	1
PF07224	1	0	0	0	1	0	0	0	0	0	0
PF07227	2	0	2	0	0	0	0	0	0	0	0
PF07244	2	0	0	0	0	0	0	0	0	0	2
PF07298	1	0	0	0	0	0	0	0	0	0	1
PF07320	9	0	0	0	0	0	0	0	0	7	2
PF07343	1	0	0	0	1	0	0	0	0	0	0
PF07393	1	0	0	0	0	0	0	0	0	1	0
PF07466	1	0	0	0	0	0	0	0	0	0	1
PF07479	1	0	0	0	0	0	0	0	1	0	0
PF07496	1	0	1	0	0	0	0	0	0	0	0
PF07500	1	0	1	0	0	0	0	0	0	0	0
PF07516	1	0	0	0	0	0	0	0	0	0	1
PF07517	1	0	0	0	0	0	0	0	0	0	1
PF07521	4	0	3	0	0	0	0	0	0	0	1
PF07526	3	0	3	0	0	0	0	0	0	0	0
PF07529	2	1	1	0	0	0	0	0	0	0	0
PF07539	1	0	0	0	0	0	0	1	0	0	0
PF07541	1	0	1	0	0	0	0	0	0	0	0
PF07569	1	0	1	0	0	0	0	0	0	0	0
PF07645	6	0	0	0	0	0	0	0	0	6	0
PF07646	8	0	1	0	0	1	0	2	2	2	0
PF07649	2	0	1	0	0	0	0	0	0	0	1
PF07650	2	0	0	0	0	0	0	0	1	0	1
PF07651	1	0	0	0	0	0	0	0	0	1	0
PF07683	1	0	0	0	0	0	0	0	0	0	1
PF07687	3	0	0	0	1	0	2	0	0	0	0
PF07690	17	0	0	0	3	0	0	1	0	8	5
PF07712	1	0	0	0	1	0	0	0	0	0	0
PF07713	1	0	1	0	0	0	0	0	0	0	0
PF07714	55	0	1	0	0	0	1	0	4	49	0
PF07716	5	0	5	0	0	0	0	0	0	0	0
PF07717	3	0	2	0	0	0	0	0	0	0	1
PF07719	7	1	1	1	0	0	1	0	0	1	2
PF07722	3	0	0	0	3	0	0	0	0	0	0
PF07723	4	0	1	0	1	0	0	0	0	1	1
PF07724	6	0	0	1	0	0	0	0	0	0	5
PF07725	6	0	1	2	0	0	0	0	0	1	2
PF07728	1	0	0	0	0	0	0	0	0	0	1
PF07731	7	2	0	0	0	0	1	0	0	4	0
PF07732	7	2	0	0	0	0	1	0	0	4	0
PF07734	4	0	2	0	1	0	0	0	0	0	1
PF07738	2	0	1	0	0	0	0	0	0	1	0
PF07748	2	0	0	0	1	0	0	1	0	0	0
PF07749	1	0	0	0	0	0	1	0	0	0	0
PF07765	5	0	1	0	0	0	0	0	0	4	0
PF07766	2	0	0	1	0	0	0	0	0	0	1
PF07777	2	0	1	0	0	0	0	0	1	0	0
PF07797	1	0	0	0	0	0	0	0	0	0	1
PF07798	1	0	0	1	0	0	0	0	0	0	0
PF07807	1	0	1	0	0	0	0	0	0	0	0
PF07808	1	0	1	0	0	0	0	0	0	0	0
PF07816	2	0	0	0	0	0	0	0	0	2	0
PF07819	1	0	0	0	0	0	0	0	0	0	1
PF07821	2	1	0	0	0	0	0	0	0	0	1
PF07839	2	0	0	0	0	0	0	0	0	2	0
PF07842	1	0	1	0	0	0	0	0	0	0	0
PF07844	1	0	0	0	0	0	0	0	0	1	0
PF07859	1	0	1	0	0	0	0	0	0	0	0
PF07876	4	0	0	0	0	0	0	0	1	1	2
PF07883	1	0	1	0	0	0	0	0	0	0	0
PF07884	1	0	0	0	0	0	0	0	0	0	1
PF07885	4	0	0	0	4	0	0	0	0	0	0
PF07890	1	0	1	0	0	0	0	0	0	0	0
PF07897	2	0	2	0	0	0	0	0	0	0	0
PF07899	1	0	1	0	0	0	0	0	0	0	0
PF07928	1	0	0	0	0	0	0	0	0	0	1
PF07939	1	0	0	0	0	0	0	0	0	0	1
PF07944	1	0	0	0	1	0	0	0	0	0	0
PF07946	2	0	0	0	0	0	2	0	0	0	0
PF07967	1	0	1	0	0	0	0	0	0	0	0
PF07970	2	0	0	0	0	0	1	0	0	1	0
PF07973	2	0	0	0	0	0	0	0	0	0	2
PF07977	2	0	0	0	0	0	0	0	0	0	2
PF07983	15	0	0	0	0	0	0	0	0	15	0
PF07985	1	0	1	0	0	0	0	0	0	0	0
PF07990	1	0	0	0	0	0	0	0	0	1	0
PF07991	1	0	0	0	0	0	0	0	0	0	1
PF07992	21	0	0	8	0	1	0	0	2	2	8
PF07993	3	0	0	0	0	0	1	0	0	0	2
PF08022	8	0	0	0	1	0	0	0	0	6	1
PF08029	2	0	0	0	0	0	0	0	0	0	2
PF08030	8	0	0	0	1	0	0	0	0	6	1
PF08031	1	0	0	0	0	0	0	0	0	1	0
PF08032	1	0	0	0	0	0	0	0	0	0	1
PF08041	1	0	0	0	0	0	0	0	0	0	1
PF08060	3	0	3	0	0	0	0	0	0	0	0
PF08071	1	0	0	0	0	0	0	0	0	1	0
PF08082	1	0	0	0	0	0	0	0	0	0	1
PF08083	1	0	0	0	0	0	0	0	0	0	1
PF08084	1	0	0	0	0	0	0	0	0	0	1
PF08127	2	0	0	0	2	0	0	0	0	0	0
PF08137	1	0	0	0	0	0	0	0	0	1	0
PF08148	2	0	0	0	1	0	0	0	0	0	1
PF08152	2	0	1	0	0	0	0	0	0	0	1
PF08154	1	0	1	0	0	0	0	0	0	0	0
PF08156	3	0	3	0	0	0	0	0	0	0	0
PF08159	1	0	1	0	0	0	0	0	0	0	0
PF08172	1	0	0	0	0	0	0	1	0	0	0
PF08207	1	0	0	0	0	0	0	0	0	0	1
PF08212	1	0	0	0	0	0	0	0	0	0	1
PF08235	1	1	0	0	0	0	0	0	0	0	0
PF08238	2	0	1	0	0	0	1	0	0	0	0
PF08240	5	1	0	0	0	2	0	0	0	1	1
PF08241	9	0	1	1	1	0	1	0	0	1	4
PF08242	2	0	2	0	0	0	0	0	0	0	0
PF08244	3	0	0	0	3	0	0	0	0	0	0
PF08245	4	0	0	1	0	0	0	0	1	0	2
PF08246	5	0	0	0	5	0	0	0	0	0	0
PF08263	74	0	0	3	0	0	0	1	0	65	5
PF08264	4	0	0	0	0	0	0	0	0	0	4
PF08267	2	0	0	0	0	0	0	0	2	0	0
PF08268	3	0	0	0	0	0	0	0	0	1	2
PF08271	1	0	1	0	0	0	0	0	0	0	0
PF08276	6	0	1	0	0	0	0	0	1	4	0
PF08282	3	0	0	0	0	0	0	0	0	3	0
PF08294	1	0	0	1	0	0	0	0	0	0	0
PF08321	1	0	1	0	0	0	0	0	0	0	0
PF08323	5	0	0	0	0	0	0	0	0	0	5
PF08326	1	0	0	0	0	0	0	0	0	1	0
PF08328	1	0	0	0	0	0	0	0	0	0	1
PF08338	1	0	0	0	0	0	0	0	0	0	1
PF08355	2	0	0	2	0	0	0	0	0	0	0
PF08356	2	0	0	2	0	0	0	0	0	0	0
PF08367	2	0	0	0	0	0	0	0	0	0	2
PF08370	7	0	0	0	0	0	0	0	0	7	0
PF08372	4	0	0	0	0	0	2	0	0	1	1
PF08375	2	0	0	0	0	0	0	0	0	2	0
PF08381	2	0	1	0	0	0	0	0	0	1	0
PF08387	2	0	1	0	0	0	0	0	0	0	1
PF08392	7	0	0	0	0	0	7	0	0	0	0
PF08414	5	0	0	0	1	0	0	0	0	4	0
PF08417	4	0	0	0	0	0	0	0	0	0	4
PF08436	1	0	0	0	0	0	0	0	0	0	1
PF08442	2	0	0	1	0	0	0	0	1	0	0
PF08446	3	0	3	0	0	0	0	0	0	0	0
PF08449	2	0	0	0	0	0	1	1	0	0	0
PF08458	1	0	0	0	0	0	0	0	0	1	0
PF08472	2	0	1	0	0	0	0	0	0	1	0
PF08477	3	0	1	2	0	0	0	0	0	0	0
PF08488	3	0	0	0	0	0	0	0	0	3	0
PF08490	1	1	0	0	0	0	0	0	0	0	0
PF08498	2	0	0	0	1	0	1	0	0	0	0
PF08501	1	0	0	0	0	0	0	0	0	0	1
PF08502	2	0	0	0	0	0	0	0	0	0	2
PF08511	1	0	0	1	0	0	0	0	0	0	0
PF08512	1	0	1	0	0	0	0	0	0	0	0
PF08513	3	0	3	0	0	0	0	0	0	0	0
PF08514	1	0	1	0	0	0	0	0	0	0	0
PF08523	3	0	3	0	0	0	0	0	0	0	0
PF08534	4	0	0	1	0	0	0	0	0	1	2
PF08536	3	0	0	1	0	0	0	0	0	0	2
PF08541	6	0	0	0	0	0	5	0	0	0	1
PF08542	1	0	1	0	0	0	0	0	0	0	0
PF08543	1	0	0	0	0	0	0	0	0	0	1
PF08544	2	0	0	0	0	0	0	0	0	0	2
PF08545	1	0	0	0	0	0	0	0	0	0	1
PF08547	2	0	0	1	0	0	0	0	0	0	1
PF08569	1	0	0	0	0	0	0	0	0	1	0
PF08585	1	0	0	1	0	0	0	0	0	0	0
PF08606	2	0	1	0	0	0	0	0	0	0	1
PF08610	1	0	0	0	0	1	0	0	0	0	0
PF08623	1	0	0	0	0	0	0	0	0	1	0
PF08625	1	0	1	0	0	0	0	0	0	0	0
PF08631	1	0	0	0	0	0	0	0	0	0	1
PF08637	1	0	0	1	0	0	0	0	0	0	0
PF08644	1	0	1	0	0	0	0	0	0	0	0
PF08646	1	0	1	0	0	0	0	0	0	0	0
PF08648	1	0	0	0	0	0	0	0	1	0	0
PF08662	1	0	0	0	0	0	0	0	0	1	0
PF08669	1	0	0	0	0	0	0	0	0	0	1
PF08670	4	0	4	0	0	0	0	0	0	0	0
PF08693	2	0	0	0	0	0	0	0	0	2	0
PF08699	2	0	2	0	0	0	0	0	0	0	0
PF08700	2	0	0	0	0	0	0	0	0	2	0
PF08701	1	0	1	0	0	0	0	0	0	0	0
PF08711	2	0	1	0	0	0	0	0	1	0	0
PF08712	2	0	0	2	0	0	0	0	0	0	0
PF08718	1	0	0	0	0	0	0	0	0	1	0
PF08744	1	0	1	0	0	0	0	0	0	0	0
PF08752	1	0	0	0	0	0	0	0	0	0	1
PF08755	1	0	0	0	0	0	0	0	0	0	1
PF08766	1	0	0	1	0	0	0	0	0	0	0
PF08777	1	0	1	0	0	0	0	0	0	0	0
PF08781	1	0	1	0	0	0	0	0	0	0	0
PF08784	1	0	1	0	0	0	0	0	0	0	0
PF08797	1	0	0	0	0	0	0	0	0	0	1
PF08799	1	0	1	0	0	0	0	0	0	0	0
PF08801	1	0	0	0	0	0	0	0	0	0	1
PF08802	1	0	0	0	0	0	0	0	0	0	1
PF08847	1	0	0	0	0	0	0	0	0	0	1
PF08879	1	0	0	0	0	0	0	0	0	0	1
PF08880	2	0	1	0	0	0	0	0	0	0	1
PF08920	1	0	0	0	0	0	0	0	0	0	1
PF09066	2	0	0	0	0	0	0	0	0	2	0
PF09072	1	0	0	0	0	0	0	0	0	1	0
PF09088	1	0	1	0	0	0	0	0	0	0	0
PF09090	1	0	1	0	0	0	0	0	0	0	0
PF09103	1	0	0	1	0	0	0	0	0	0	0
PF09169	1	0	0	1	0	0	0	0	0	0	0
PF09177	2	0	2	0	0	0	0	0	0	0	0
PF09180	1	0	0	0	0	0	0	0	0	0	1
PF09258	1	0	0	0	0	0	0	1	0	0	0
PF09261	2	0	0	0	1	0	0	1	0	0	0
PF09265	3	0	0	0	2	0	1	0	0	0	0
PF09268	2	0	0	0	0	0	0	0	0	1	1
PF09269	1	0	0	0	0	0	0	0	0	0	1
PF09273	3	0	0	0	0	0	0	0	0	0	3
PF09279	3	0	0	0	0	0	0	0	0	3	0
PF09282	1	0	1	0	0	0	0	0	0	0	0
PF09285	1	0	0	0	0	0	0	0	0	0	1
PF09297	1	0	0	0	0	0	0	0	0	0	1
PF09320	1	0	0	0	0	0	0	0	0	1	0
PF09324	1	0	0	0	0	0	0	0	0	0	1
PF09325	1	0	0	0	0	0	0	0	0	0	0
PF09326	1	0	0	1	0	0	0	0	0	0	0
PF09335	3	0	0	0	0	0	1	0	0	1	1
PF09336	1	0	0	0	0	0	0	0	0	0	0
PF09340	1	0	0	0	1	0	0	0	0	0	0
PF09348	1	0	0	0	0	0	0	0	0	0	1
PF09353	5	0	0	0	0	0	0	0	0	0	5
PF09358	1	0	0	0	0	0	0	0	0	1	0
PF09360	1	0	0	0	0	0	0	0	0	0	1
PF09366	1	0	0	0	0	0	0	0	0	0	1
PF09379	1	0	0	0	0	0	0	0	0	1	0
PF09384	1	0	1	0	0	0	0	0	0	0	0
PF09405	1	0	0	0	0	0	0	0	1	0	0
PF09416	1	0	0	0	0	0	0	0	0	1	0
PF09425	3	0	3	0	0	0	0	0	0	0	0
PF09429	1	0	1	0	0	0	0	0	0	0	0
PF09430	1	0	0	0	0	0	1	0	0	0	0
PF09454	1	0	0	0	0	0	0	0	0	0	0
PF09733	1	0	1	0	0	0	0	0	0	0	0
PF09737	1	0	1	0	0	0	0	0	0	0	0
PF09763	1	0	0	0	0	0	0	0	0	1	0
PF09767	1	0	0	1	0	0	0	0	0	0	0
PF09790	1	0	0	0	0	0	0	0	0	1	0
PF10063	1	0	0	0	0	0	0	0	0	0	1
PF10075	1	0	1	0	0	0	0	0	0	0	0
PF10150	1	0	0	0	0	0	0	0	0	0	1
PF10163	1	0	0	0	0	0	0	0	0	0	1
PF10184	1	0	0	0	0	0	0	0	0	0	1
PF10219	2	0	0	0	0	0	0	0	0	2	0
PF10255	1	0	0	0	0	0	0	0	0	1	0
PF10269	1	0	0	0	1	0	0	0	0	0	0
PF10276	1	0	0	1	0	0	0	0	0	0	0
PF10296	1	0	0	0	1	0	0	0	0	0	0
PF10347	1	0	0	0	0	0	0	0	0	1	0
PF10351	1	0	0	0	0	0	0	0	0	1	0
PF10369	1	0	0	0	0	0	0	0	0	0	1
PF10394	1	0	1	0	0	0	0	0	0	0	0
PF10403	1	0	0	0	0	0	0	0	0	0	1
PF10404	1	0	0	0	0	0	0	0	0	0	1
PF10405	1	0	0	0	0	0	0	0	0	0	1
PF10415	2	0	0	2	0	0	0	0	0	0	0
PF10417	2	0	0	0	0	0	0	0	0	0	2
PF10431	6	0	0	1	0	0	0	0	0	0	5
PF10440	2	0	2	0	0	0	0	0	0	0	0
PF10458	1	0	0	0	0	0	0	0	0	0	1
PF10508	1	0	0	0	0	0	0	0	0	1	0
PF10531	1	0	0	1	0	0	0	0	0	0	0
PF10545	2	0	2	0	0	0	0	0	0	0	0
PF10551	2	0	2	0	0	0	0	0	0	0	0
PF10557	3	0	2	0	0	0	0	0	0	0	1
PF10568	1	0	0	1	0	0	0	0	0	0	0
PF10576	4	0	2	0	0	0	0	0	0	0	2
PF10584	5	0	0	0	1	0	0	0	0	4	0
PF10585	2	0	0	0	0	0	0	0	1	1	0
PF10588	1	0	0	1	0	0	0	0	0	0	0
PF10589	1	0	0	1	0	0	0	0	0	0	0
PF10596	1	0	0	0	0	0	0	0	0	0	1
PF10597	1	0	0	0	0	0	0	0	0	0	1
PF10598	1	0	0	0	0	0	0	0	0	0	1
PF10602	2	0	1	0	0	0	0	0	0	1	0
PF10609	2	0	0	0	0	0	0	0	1	0	1
PF10615	1	0	0	0	0	0	0	0	0	0	1
PF10664	1	0	0	0	0	0	0	0	0	0	1
PF10674	1	0	0	0	0	0	0	0	0	0	1
PF10714	1	0	0	0	0	0	0	0	0	1	0
