# Supplementary material for: An Integrative Approach to the Identification of Arabidopsis and Rice Genes Involved in Xylan and Secondary Wall Development
Source: PLoS One. 2010 Nov 23;5(11):e15481. doi: 10.1371/journal.pone.0015481 (PMC2990762; doi:10.1371/journal.pone.0015481)
Supplement: Table S6 — Localization scores used for PFANTOM tool. (XLS) [file pone.0015481.s009.xls]

## Sheet: TableS6
Table S6. The PFANTOM tool. Pfam domain of Arabidopsis and rice target proteins can be obtained by TAIR (http://www.arabidopsis.org/tools/bulk/protein/index.jsp) and Rice Genone annotation database (http://rice.plantbiology.msu.edu/analyses_search_domain.shtml). After obtaining the Pfam domain ID, this table can be directly used for subcellular localization prediction by finding the given Pfam ID…
magnitude of change	0 %	5 %	10 %	15 %	20 %	25 %	30 %	35 %	40 %	45 %	>50 %
Pfam ID	EX	NC	MT	V	PX	ER	GO	CT	PM	PL
PF00004	0	6.6	15.5	2.2	2.2	2.2	0	0	15.5	53.3
PF00005	0	0	7.6	11.5	1.9	0	0	0	61.5	17.3
PF00006	0	0	60	0	0	0	0	0	0	40
PF00009	0	9	27.2	9	0	0	0	0	9	45.4
PF00010	0	80.9	9.5	0	0	0	0	4.7	0	4.7
PF00011	0	33.3	0	0	33.3	33.3	0	0	0	0
PF00012	0	0	22.2	0	0	0	0	0	44.4	33.3
PF00013	0	50	25	0	0	0	0	0	0	25
PF00016	0	0	0	0	0	0	0	0	0	100
PF00018	0	0	0	0	0	0	0	0	100	0
PF00022	0	66.6	22.2	0	0	0	0	0	11.1	0
PF00023	5	25	0	0	0	0	0	5	45	20
PF00024	0	0	0	0	0	0	0	0	100	0
PF00025	0	0	0	14.2	0	0	14.2	0	57.1	14.2
PF00026	33.3	0	0	22.2	0	11.1	0	0	33.3	0
PF00027	0	12.5	0	0	12.5	0	0	0	75	0
PF00031	0	0	0	50	0	0	0	0	50	0
PF00032	0	0	50	0	0	0	0	0	0	50
PF00033	0	0	50	0	0	0	0	0	0	50
PF00035	0	100	0	0	0	0	0	0	0	0
PF00036	0	9.8	5.8	15.6	1.9	3.9	0	3.9	52.9	3.9
PF00037	0	0	50	0	0	0	0	0	0	50
PF00042	0	0	0	0	0	0	0	0	100	0
PF00043	11.1	0	22.2	0	0	0	0	0	44.4	22.2
PF00044	0	0	0	0	0	0	0	0	0	100
PF00046	0	94.7	0	5.2	0	0	0	0	0	0
PF00050	0	0	0	0	0	0	0	0	100	0
PF00056	0	0	16.6	0	16.6	0	0	0	33.3	33.3
PF00060	0	0	0	100	0	0	0	0	0	0
PF00063	0	0	0	25	25	0	0	0	50	0
PF00067	0	0	3.3	3.3	0	60	0	0	13.3	20
PF00069	0.3	11.4	3.4	1.5	1.1	0.7	0	6.4	70.3	3.4
PF00070	0	0	50	0	8.3	0	0	8.3	8.3	25
PF00071	0	5.5	5.5	2.7	2.7	0	0	0	77.7	2.7
PF00072	0	78.9	0	5.2	0	5.2	0	0	5.2	5.2
PF00076	0	65.4	7.2	0	0	0	0	0	5.4	21.8
PF00079	33.3	33.3	0	0	0	0	0	33.3	0	0
PF00080	0	0	0	0	0	0	0	0	0	100
PF00081	0	0	25	0	0	0	0	0	0	75
PF00082	83.3	0	0	0	0	0	0	0	16.6	0
PF00083	0	4.7	0	14.2	0	0	0	0	66.6	14.2
PF00085	0	0	0	0	0	9.3	3.1	6.2	9.3	71.8
PF00089	0	0	0	0	0	0	0	0	0	100
PF00091	0	0	0	8.3	0	0	0	16.6	50	25
PF00092	0	0	0	0	0	0	0	0	100	0
PF00096	0	93.3	6.6	0	0	0	0	0	0	0
PF00097	0	22.8	2.8	5.7	2.8	8.5	0	0	51.4	5.7
PF00098	0	92.3	0	0	0	0	0	0	0	7.6
PF00101	0	0	0	0	0	0	0	0	0	100
PF00102	0	0	0	0	0	0	0	0	100	0
PF00106	0	0	0	0	21.4	14.2	0	14.2	14.2	35.7
PF00107	16.6	0	0	0	33.3	0	0	0	33.3	16.6
PF00108	0	0	0	0	100	0	0	0	0	0
PF00109	0	0	0	0	0	0	0	0	0	100
PF00111	0	0	42.8	0	0	0	0	0	0	57.1
PF00112	0	0	0	100	0	0	0	0	0	0
PF00113	0	50	0	0	0	0	0	0	0	50
PF00117	0	0	0	0	0	0	0	0	0	100
PF00118	0	0	36.3	0	0	0	0	0	18.1	45.4
PF00119	0	0	0	0	0	0	0	0	0	100
PF00120	0	0	0	0	0	0	0	0	33.3	66.6
PF00121	0	0	0	0	0	0	0	0	0	100
PF00122	0	0	0	3.7	0	11.1	7.4	0	62.9	14.8
PF00124	0	0	0	0	0	0	0	0	0	100
PF00125	0	81.2	0	12.5	0	0	0	0	0	6.2
PF00127	0	0	0	0	0	0	0	0	0	100
PF00128	11.1	0	0	0	0	0	0	0	0	88.8
PF00132	0	0	60	0	10	0	0	30	0	0
PF00133	0	0	0	0	0	0	0	0	0	100
PF00134	0	100	0	0	0	0	0	0	0	0
PF00136	100	0	0	0	0	0	0	0	0	0
PF00137	0	0	14.2	57.1	0	0	0	0	14.2	14.2
PF00139	10	0	10	0	0	0	0	0	80	0
PF00140	0	0	0	0	0	0	0	0	0	100
PF00141	15.3	15.3	0	38.4	0	0	0	0	7.6	23
PF00146	0	0	66.6	0	0	0	0	0	0	33.3
PF00149	0	41.1	0	11.7	5.8	5.8	0	0	23.5	5.8
PF00152	0	0	0	0	0	0	0	0	0	100
PF00153	0	0	21.4	0	14.2	7.1	0	0	7.1	50
PF00155	0	0	30	0	10	10	0	10	10	30
PF00156	0	0	0	0	0	0	0	20	40	40
PF00160	0	20	0	0	0	0	10	0	20	50
PF00162	0	0	0	0	0	0	0	0	33.3	66.6
PF00163	0	0	0	0	0	0	0	0	0	100
PF00164	0	0	0	0	0	0	0	100	0	0
PF00166	0	0	50	0	0	0	0	0	0	50
PF00168	0	0	0	4.3	0	8.6	0	0	60.8	26
PF00169	0	0	0	25	0	0	0	0	62.5	12.5
PF00170	0	92.8	0	0	0	0	0	7.1	0	0
PF00171	0	0	50	0	12.5	25	0	0	0	12.5
PF00173	0	0	0	0	0	33.3	0	0	33.3	33.3
PF00174	0	0	0	0	100	0	0	0	0	0
PF00175	0	0	16.6	0	0	33.3	0	0	0	50
PF00176	0	80	0	0	0	0	0	0	0	20
PF00177	0	0	0	0	0	0	0	0	0	100
PF00179	0	57.1	0	14.2	0	0	0	0	28.5	0
PF00180	0	0	62.5	0	0	0	0	0	0	37.5
PF00181	0	0	0	0	0	0	0	50	0	50
PF00182	66.6	0	0	0	0	0	0	0	33.3	0
PF00183	0	0	50	0	0	0	0	0	0	50
PF00185	0	0	0	0	0	0	0	0	0	100
PF00187	66.6	0	0	0	0	0	0	0	33.3	0
PF00189	0	0	0	0	0	0	0	50	0	50
PF00190	75	25	0	0	0	0	0	0	0	0
PF00191	0	0	0	100	0	0	0	0	0	0
PF00194	0	0	0	0	0	0	0	0	0	100
PF00197	50	0	50	0	0	0	0	0	0	0
PF00198	0	0	75	0	0	0	0	0	0	25
PF00202	0	0	50	0	0	0	0	0	0	50
PF00203	0	0	14.2	0	0	0	0	57.1	14.2	14.2
PF00204	0	33.3	66.6	0	0	0	0	0	0	0
PF00205	0	0	0	0	0	0	0	0	0	100
PF00206	0	0	50	0	0	0	0	0	0	50
PF00208	0	0	100	0	0	0	0	0	0	0
PF00210	0	0	0	0	0	0	0	0	0	100
PF00213	0	0	50	0	0	0	0	0	0	50
PF00218	0	0	0	0	0	0	0	0	0	100
PF00223	0	0	0	0	0	0	0	0	0	100
PF00224	0	0	16.6	0	0	0	0	0	33.3	50
PF00225	0	10	10	0	0	0	0	0	70	10
PF00226	0	5.5	5.5	5.5	0	27.7	0	0	22.2	33.3
PF00227	0	0	0	28.5	0	0	0	0	71.4	0
PF00230	0	0	0	17.6	0	5.8	0	0	76.4	0
PF00231	0	0	0	0	0	0	0	0	0	100
PF00232	0	0	0	60	20	0	0	0	0	20
PF00234	15.3	7.6	0	0	0	0	0	0	53.8	23
PF00235	0	75	0	0	0	0	0	0	25	0
PF00237	0	0	50	0	0	0	0	0	0	50
PF00238	0	0	0	0	0	0	0	50	0	50
PF00240	0	22.2	0	33.3	11.1	0	0	22.2	11.1	0
PF00244	0	0	0	0	0	0	0	0	100	0
PF00248	0	0	0	0	0	0	0	0	20	80
PF00249	0	95.6	0	0	0	0	0	0	0	4.3
PF00251	0	0	0	100	0	0	0	0	0	0
PF00252	0	0	0	0	0	0	0	0	0	100
PF00253	0	0	0	0	0	0	0	75	0	25
PF00254	0	13.3	0	13.3	0	0	0	0	6.6	66.6
PF00255	0	0	0	0	0	0	0	0	50	50
PF00256	0	0	0	0	0	0	0	66.6	0	33.3
PF00257	0	0	0	0	0	0	0	0	0	100
PF00258	0	0	0	0	0	33.3	0	0	66.6	0
PF00262	0	0	0	0	0	100	0	0	0	0
PF00266	0	0	25	0	0	0	0	0	0	75
PF00270	0	45.4	9	9	4.5	0	0	0	4.5	27.2
PF00271	0	50	9.3	6.2	3.1	0	0	0	3.1	28.1
PF00274	0	0	0	0	0	0	0	0	0	100
PF00275	0	0	0	0	0	0	0	0	0	100
PF00276	0	0	0	0	0	0	0	50	0	50
PF00278	0	0	0	0	0	0	0	0	0	100
PF00281	0	0	0	50	0	0	0	0	0	50
PF00282	0	0	0	0	0	100	0	0	0	0
PF00283	0	0	0	0	0	0	0	0	0	100
PF00284	0	0	0	0	0	0	0	0	0	100
PF00285	0	0	50	0	50	0	0	0	0	0
PF00288	0	0	0	0	0	0	0	0	0	100
PF00289	0	0	25	0	0	0	0	0	25	50
PF00290	0	0	0	0	0	0	0	0	0	100
PF00291	0	0	28.5	0	0	0	0	0	0	71.4
PF00293	0	0	18.1	9	0	0	0	9	0	63.6
PF00294	0	16.6	0	0	0	0	0	0	33.3	50
PF00295	0	0	0	50	0	0	0	0	50	0
PF00297	0	0	33.3	0	0	0	0	33.3	0	33.3
PF00298	0	0	0	0	0	0	0	66.6	0	33.3
PF00300	0	0	0	0	0	0	0	0	0	100
PF00301	0	0	0	0	0	0	0	0	0	100
PF00304	0	0	0	0	0	0	0	0	100	0
PF00305	0	0	0	0	0	0	0	0	0	100
PF00306	0	0	60	0	0	0	0	0	0	40
PF00307	0	0	0	33.3	0	0	0	0	0	0
PF00310	0	0	0	0	0	0	0	0	0	100
PF00311	0	0	0	0	0	0	0	100	0	0
PF00312	0	0	0	0	0	0	0	0	0	100
PF00313	0	100	0	0	0	0	0	0	0	0
PF00316	0	0	0	0	0	0	0	0	0	100
PF00318	0	0	0	0	0	0	0	0	0	100
PF00319	0	83.3	0	0	0	0	0	0	16.6	0
PF00320	0	100	0	0	0	0	0	0	0	0
PF00324	0	0	0	14.2	0	0	0	0	85.7	0
PF00326	0	0	0	0	0	0	0	0	0	100
PF00328	0	0	0	0	0	0	0	0	100	0
PF00329	0	0	50	0	0	0	0	0	0	50
PF00330	0	0	66.6	0	0	0	0	0	0	33.3
PF00332	7.1	0	0	0	0	0	0	0	92.8	0
PF00333	0	0	0	0	0	0	16.6	66.6	0	16.6
PF00334	0	0	66.6	0	0	0	0	0	0	33.3
PF00335	0	0	0	20	0	0	0	0	80	0
PF00337	0	0	0	0	0	0	50	0	0	50
PF00338	0	0	25	0	0	0	0	50	0	25
PF00342	0	0	0	0	0	0	0	0	0	100
PF00343	0	0	0	0	0	0	0	0	0	100
PF00344	0	0	0	0	0	0	0	0	0	100
PF00346	0	0	50	0	0	0	0	0	0	50
PF00347	0	0	0	0	0	0	0	50	0	50
PF00348	0	0	11.1	0	0	33.3	0	0	0	55.5
PF00349	0	0	80	0	0	0	0	0	0	20
PF00350	0	0	0	0	0	0	0	0	62.5	25
PF00355	0	0	25	0	0	0	0	0	0	75
PF00360	0	100	0	0	0	0	0	0	0	0
PF00361	0	0	33.3	0	0	0	0	0	0	66.6
PF00364	0	0	46.6	0	0	0	0	0	6.6	46.6
PF00365	0	0	0	0	0	0	0	66.6	0	33.3
PF00366	0	0	0	0	0	0	0	66.6	0	33.3
PF00368	0	0	0	0	0	100	0	0	0	0
PF00370	0	0	0	0	0	0	0	33.3	0	66.6
PF00373	0	0	0	0	0	0	0	0	100	0
PF00378	0	0	16.6	0	83.3	0	0	0	0	0
PF00380	0	0	0	0	0	0	0	0	0	100
PF00382	0	66.6	0	0	0	0	0	0	0	33.3
PF00383	0	0	0	0	0	0	0	0	0	100
PF00384	0	0	100	0	0	0	0	0	0	0
PF00385	0	66.6	0	0	0	0	0	0	0	33.3
PF00387	0	0	0	0	0	0	0	0	100	0
PF00388	0	0	0	0	0	0	0	0	100	0
PF00389	0	0	50	0	50	0	0	0	0	0
PF00390	0	0	66.6	0	0	0	0	0	0	33.3
PF00391	0	0	0	0	0	0	0	0	0	100
PF00393	0	0	0	0	50	0	0	0	0	50
PF00394	28.5	0	0	0	0	14.2	0	0	57.1	0
PF00395	0	0	0	0	0	0	0	0	0	100
PF00396	0	0	0	100	0	0	0	0	0	0
PF00397	0	50	0	50	0	0	0	0	0	0
PF00400	0	58.9	2.5	0	0	2.5	0	5.1	17.9	10.2
PF00401	0	0	0	0	0	0	0	0	0	100
PF00403	0	0	0	0	0	0	12.5	0	37.5	50
PF00406	0	20	40	0	0	0	0	0	0	40
PF00407	0	0	0	50	0	0	0	0	0	50
PF00408	0	0	0	0	0	0	0	0	0	100
PF00410	0	0	0	0	0	0	0	66.6	16.6	16.6
PF00411	0	0	0	0	0	0	0	0	0	100
PF00412	0	0	0	0	0	0	0	0	100	0
PF00413	0	0	0	0	0	0	0	0	100	0
PF00415	0	0	0	0	0	0	0	0	100	0
PF00416	0	0	25	0	0	0	0	0	50	25
PF00417	0	0	0	0	0	0	0	0	0	100
PF00420	0	0	0	0	0	0	0	0	0	100
PF00421	0	0	0	0	0	0	0	0	0	100
PF00425	0	0	0	0	0	0	0	0	0	100
PF00428	0	100	0	0	0	0	0	0	0	0
PF00430	0	0	0	0	0	0	0	0	0	100
PF00432	0	0	0	100	0	0	0	0	0	0
PF00433	0	50	0	0	0	0	0	50	0	0
PF00436	0	0	0	0	0	0	0	0	0	100
PF00438	0	25	0	0	0	0	0	0	75	0
PF00439	0	75	0	0	0	0	0	0	0	25
PF00441	0	0	50	0	50	0	0	0	0	0
PF00443	0	83.3	0	0	0	0	0	0	0	16.6
PF00444	0	0	0	0	0	0	0	0	0	100
PF00445	0	0	0	100	0	0	0	0	0	0
PF00448	0	0	0	0	0	33.3	0	0	0	66.6
PF00450	14.2	0	0	85.7	0	0	0	0	0	0
PF00453	0	0	0	0	0	0	0	0	0	100
PF00454	0	0	0	20	20	0	0	0	20	40
PF00456	0	0	0	0	0	0	0	0	0	100
PF00458	0	0	100	0	0	0	0	0	0	0
PF00459	0	0	0	0	0	0	0	0	25	75
PF00462	0	11.1	22.2	0	0	0	0	0	22.2	44.4
PF00463	0	0	0	0	0	0	0	0	0	100
PF00464	0	0	33.3	0	0	0	0	0	33.3	33.3
PF00466	0	0	0	0	0	0	0	0	0	100
PF00467	0	0	0	0	0	0	0	33.3	33.3	33.3
PF00471	0	0	0	0	0	0	0	0	0	100
PF00472	0	0	0	0	0	0	0	0	0	100
PF00474	0	0	0	0	0	0	0	0	100	0
PF00479	0	0	0	0	0	0	0	0	0	100
PF00481	0	13.6	0	0	0	0	0	0	81.8	4.5
PF00483	0	0	0	0	33.3	0	0	0	0	66.6
PF00484	0	0	25	0	0	0	0	0	0	75
PF00485	0	0	0	0	0	0	0	0	0	100
PF00487	0	0	0	0	0	0	0	0	0	100
PF00488	0	75	0	0	0	0	0	0	25	0
PF00490	0	0	0	0	0	0	0	0	0	100
PF00491	0	0	0	0	0	0	0	0	0	100
PF00493	0	100	0	0	0	0	0	0	0	0
PF00494	0	0	0	0	0	50	0	0	0	50
PF00498	0	0	0	0	0	0	0	0	50	50
PF00501	0	0	0	0	53.3	6.6	0	0	6.6	33.3
PF00503	0	75	0	0	0	0	0	0	25	0
PF00504	0	0	0	0	0	0	0	0	0	100
PF00505	0	66.6	0	0	0	0	0	0	0	33.3
PF00507	0	0	0	0	0	0	0	0	0	100
PF00512	0	50	0	16.6	0	16.6	0	0	16.6	0
PF00514	0	53.8	0	0	0	0	0	0	38.4	7.6
PF00515	4.3	21.7	8.6	13	0	4.3	0	0	34.7	13
PF00520	0	14.2	0	14.2	0	0	0	0	71.4	0
PF00521	0	50	0	0	0	0	0	0	0	50
PF00533	0	100	0	0	0	0	0	0	0	0
PF00534	0	0	0	0	0	7.6	15.3	0	23	53.8
PF00535	0	33.3	0	0	0	33.3	33.3	0	0	0
PF00536	0	0	0	0	0	0	0	0	0	100
PF00538	0	100	0	0	0	0	0	0	0	0
PF00542	0	0	33.3	0	0	0	0	0	0	66.6
PF00543	0	0	0	0	0	0	0	0	0	100
PF00549	0	0	100	0	0	0	0	0	0	0
PF00550	0	0	33.3	0	0	0	0	0	0	66.6
PF00551	0	0	66.6	0	0	0	0	0	0	33.3
PF00557	0	20	0	0	0	0	0	0	20	60
PF00560	0.9	0	6.4	0.9	0	0	0.9	0.9	82.4	7.4
PF00561	5.8	0	0	17.6	5.8	5.8	0	0	23.5	41.1
PF00562	0	50	0	0	0	0	0	0	0	50
PF00564	0	0	0	25	0	0	0	50	0	25
PF00566	0	0	33.3	0	0	0	0	33.3	0	33.3
PF00569	0	100	0	0	0	0	0	0	0	0
PF00571	0	0	22.2	0	0	0	11.1	0	33.3	33.3
PF00572	0	0	0	0	0	0	0	75	0	25
PF00573	0	0	0	0	0	0	0	0	0	100
PF00574	0	0	10	0	0	0	0	0	0	90
PF00575	0	16.6	0	0	0	0	0	0	0	83.3
PF00578	0	0	0	0	0	0	0	0	0	100
PF00579	0	0	0	0	0	0	0	0	0	100
PF00581	0	0	25	0	0	0	0	0	0	75
PF00582	0	0	0	40	0	0	0	0	60	0
PF00583	0	40	0	0	0	0	0	0	0	60
PF00584	0	0	0	0	0	0	0	0	100	0
PF00586	0	0	0	0	0	0	0	0	0	100
PF00587	0	0	20	0	0	0	0	0	0	80
PF00588	0	0	0	0	0	0	0	0	0	100
PF00590	0	0	0	0	0	0	0	0	0	100
PF00591	0	0	0	0	0	0	0	0	0	100
PF00595	0	0	0	0	0	0	0	0	0	100
PF00596	0	0	0	0	0	0	0	0	0	100
PF00609	0	0	0	0	0	0	0	0	100	0
PF00612	0	5.8	0	11.7	5.8	0	0	5.8	70.5	0
PF00613	0	0	0	0	0	0	0	0	100	0
PF00614	0	0	0	16.6	0	0	0	0	50	33.3
PF00620	0	0	0	0	0	0	0	0	50	50
PF00623	0	75	0	0	0	0	0	0	0	25
PF00626	0	0	0	0	0	0	0	0	0	0
PF00627	0	0	33.3	0	0	0	0	0	33.3	33.3
PF00628	0	94.1	0	0	0	0	0	0	0	5.8
PF00632	0	0	0	0	0	0	0	0	100	0
PF00633	0	0	0	0	0	0	0	0	0	100
PF00634	0	0	100	0	0	0	0	0	0	0
PF00635	0	0	0	0	0	0	0	0	100	0
PF00636	0	80	0	20	0	0	0	0	0	0
PF00637	0	0	0	0	0	0	0	0	50	50
PF00639	0	0	0	0	0	0	0	0	50	50
PF00641	0	33.3	0	0	0	0	0	0	0	66.6
PF00642	0	83.3	0	0	0	0	0	0	0	16.6
PF00643	0	83.3	0	0	0	0	0	0	16.6	0
PF00644	0	100	0	0	0	0	0	0	0	0
PF00646	0	48	0	8	4	0	0	0	20	20
PF00647	0	0	0	0	0	0	0	0	100	0
PF00648	0	0	0	0	0	0	0	0	100	0
PF00650	0	0	0	0	0	0	0	0	75	25
PF00651	0	60	0	0	0	0	0	0	40	0
PF00654	0	0	0	0	0	0	33.3	0	33.3	33.3
PF00656	100	0	0	0	0	0	0	0	0	0
PF00657	27.2	0	0	63.6	0	0	0	0	0	9
PF00662	0	0	50	0	0	0	0	0	0	50
PF00664	0	0	16	20	0	0	0	0	52	12
PF00667	0	0	0	0	0	100	0	0	0	0
PF00670	0	0	0	0	0	0	0	0	100	0
PF00673	0	0	0	50	0	0	0	0	0	50
PF00675	0	0	42.8	0	0	0	0	0	0	57.1
PF00676	0	0	83.3	0	0	0	0	0	0	16.6
PF00677	0	0	0	0	0	0	0	0	0	100
PF00679	0	16.6	33.3	0	0	0	0	0	0	50
PF00682	0	0	20	0	0	0	0	0	0	80
PF00684	0	0	16.6	0	0	0	0	0	33.3	50
PF00686	0	0	0	0	0	0	0	33.3	0	66.6
PF00687	0	0	0	0	0	0	0	50	0	50
PF00689	0	0	0	14.2	0	28.5	14.2	0	42.8	0
PF00690	0	0	0	5.5	0	11.1	5.5	0	72.2	5.5
PF00694	0	0	40	0	0	0	0	0	0	60
PF00696	0	0	0	0	0	0	0	0	0	100
PF00697	0	0	0	0	0	0	0	0	0	100
PF00698	0	0	0	0	0	0	0	0	0	100
PF00701	0	0	0	0	0	0	0	0	0	100
PF00702	0	0	2.6	2.6	0	7.8	5.2	0	44.7	36.8
PF00703	0	0	0	50	0	0	0	0	0	50
PF00705	0	100	0	0	0	0	0	0	0	0
PF00707	0	0	0	0	0	0	0	0	0	100
PF00709	0	0	0	0	0	0	0	0	0	100
PF00717	0	0	0	0	0	0	0	0	33.3	66.6
PF00719	0	50	0	0	0	0	0	0	0	50
PF00722	0	0	0	0	0	0	0	0	100	0
PF00724	0	0	0	0	100	0	0	0	0	0
PF00725	0	0	0	0	100	0	0	0	0	0
PF00728	0	0	0	33.3	0	0	0	0	66.6	0
PF00730	0	60	0	0	0	0	0	0	0	40
PF00731	0	0	0	0	0	0	0	0	0	100
PF00732	0	0	0	0	0	100	0	0	0	0
PF00736	50	0	0	0	0	0	0	0	50	0
PF00737	0	0	0	0	0	0	0	0	0	100
PF00742	0	0	0	0	0	0	0	0	0	100
PF00743	0	0	0	100	0	0	0	0	0	0
PF00745	0	0	0	0	0	0	0	0	0	100
PF00749	0	0	0	0	0	0	0	0	0	100
PF00750	0	0	0	0	0	0	0	0	0	100
PF00753	0	60	0	0	0	0	0	0	0	40
PF00756	100	0	0	0	0	0	0	0	0	0
PF00759	0	0	0	0	0	0	0	0	80	20
PF00762	0	0	0	0	0	0	0	0	0	100
PF00763	0	0	0	0	0	0	0	0	0	100
PF00764	0	0	0	0	0	0	0	0	0	100
PF00766	0	0	100	0	0	0	0	0	0	0
PF00773	0	0	0	0	0	0	0	0	0	100
PF00777	0	0	0	0	0	0	100	0	0	0
PF00781	0	0	20	20	0	0	0	0	60	0
PF00782	0	25	0	0	0	0	0	0	0	75
PF00784	0	0	0	0	0	0	0	0	100	0
PF00786	0	0	0	0	0	0	0	0	100	0
PF00787	0	0	0	0	0	0	0	0	0	0
PF00789	0	0	0	0	0	0	0	100	0	0
PF00790	0	0	0	0	0	0	0	0	100	0
PF00795	0	0	0	0	0	0	0	0	0	100
PF00800	0	0	0	0	0	0	0	0	0	100
PF00804	0	9	0	9	0	0	18.1	0	54.5	0
PF00805	0	0	0	0	0	0	0	0	0	100
PF00806	0	33.3	0	33.3	0	0	0	0	33.3	0
PF00808	0	100	0	0	0	0	0	0	0	0
PF00809	0	0	0	0	0	0	0	100	0	0
PF00810	0	0	0	0	0	0	100	0	0	0
PF00814	0	0	100	0	0	0	0	0	0	0
PF00815	0	0	0	0	0	0	0	0	0	100
PF00827	0	0	0	0	0	0	0	0	100	0
PF00828	0	0	0	0	0	0	0	100	0	0
PF00829	0	0	50	0	0	0	0	0	0	50
PF00830	0	0	0	0	0	0	0	0	0	100
PF00831	0	0	0	0	0	0	0	50	25	25
PF00832	0	0	0	0	0	0	0	100	0	0
PF00833	0	0	0	0	0	0	0	100	0	0
PF00834	0	0	0	0	0	0	0	0	50	50
PF00847	0	93.3	0	0	0	0	0	0	0	6.6
PF00849	0	0	0	0	0	0	0	0	0	100
PF00850	0	66.6	0	0	0	0	0	0	0	33.3
PF00852	0	0	0	0	0	0	100	0	0	0
PF00854	0	0	0	5.8	0	0	0	0	94.1	0
PF00855	0	50	0	0	0	0	0	0	0	50
PF00856	0	73.3	0	0	0	0	0	0	0	26.6
PF00860	0	0	0	20	0	0	0	0	80	0
PF00861	0	0	0	0	0	0	0	0	0	100
PF00875	0	100	0	0	0	0	0	0	0	0
PF00883	0	0	0	50	0	0	0	0	0	50
PF00885	0	0	0	0	0	0	0	0	0	100
PF00886	0	0	0	0	0	0	0	0	0	100
PF00887	25	0	0	0	0	0	0	50	25	0
PF00888	0	66.6	0	0	0	0	0	0	0	33.3
PF00889	0	0	50	0	0	0	0	0	0	50
PF00890	0	0	33.3	0	0	33.3	0	0	0	33.3
PF00892	0	0	0	0	0	0	20	0	40	40
PF00899	0	0	0	0	33.3	0	0	33.3	33.3	0
PF00900	0	0	0	0	0	0	0	0	100	0
PF00902	0	0	0	0	0	0	0	0	0	100
PF00903	0	0	0	0	0	0	0	0	0	100
PF00909	0	0	0	0	0	0	0	0	100	0
PF00916	0	0	0	50	0	0	0	0	50	0
PF00917	0	0	33.3	33.3	0	0	0	0	0	33.3
PF00919	0	0	0	0	0	100	0	0	0	0
PF00920	0	0	0	0	0	0	0	0	0	100
PF00923	0	0	0	0	0	0	0	0	0	100
PF00924	0	0	0	0	0	0	0	0	50	50
PF00925	0	0	0	0	0	0	0	0	0	100
PF00926	0	0	0	0	0	0	0	0	0	100
PF00928	0	0	0	0	0	0	0	0	100	0
PF00931	6.2	6.2	18.7	0	0	0	0	0	50	18.7
PF00933	50	0	0	25	0	0	0	0	25	0
PF00935	0	0	0	0	0	0	0	100	0	0
PF00939	0	0	0	33.3	0	0	0	0	0	66.6
PF00940	0	0	100	0	0	0	0	0	0	0
PF00954	0	16.6	0	0	0	0	0	16.6	66.6	0
PF00955	0	0	0	0	0	0	0	0	100	0
PF00956	0	100	0	0	0	0	0	0	0	0
PF00957	0	0	0	37.5	0	0	0	0	37.5	12.5
PF00970	0	0	100	0	0	0	0	0	0	0
PF00977	0	0	0	0	0	0	0	0	0	100
PF00982	0	0	100	0	0	0	0	0	0	0
PF00986	0	0	100	0	0	0	0	0	0	0
PF00988	0	0	0	0	0	0	0	0	0	100
PF00989	0	100	0	0	0	0	0	0	0	0
PF00995	0	0	0	50	0	0	0	0	50	0
PF00999	0	0	14.2	0	0	0	0	0	42.8	42.8
PF01000	0	66.6	0	0	0	0	0	0	0	33.3
PF01010	0	0	0	0	0	0	0	0	0	100
PF01012	0	0	100	0	0	0	0	0	0	0
PF01014	0	0	0	0	100	0	0	0	0	0
PF01016	0	0	0	0	0	0	0	0	0	100
PF01018	0	0	0	0	0	0	0	0	0	100
PF01019	66.6	0	0	33.3	0	0	0	0	0	0
PF01025	0	0	33.3	0	0	0	0	0	0	66.6
PF01027	0	0	0	100	0	0	0	0	0	0
PF01029	0	0	0	0	0	0	0	0	0	100
PF01031	0	0	0	0	0	0	0	0	100	0
PF01039	0	0	33.3	0	0	0	0	0	33.3	33.3
PF01040	0	0	0	0	0	0	0	0	0	100
PF01042	0	0	0	0	0	0	0	0	0	100
PF01043	0	0	0	0	0	0	0	0	0	100
PF01048	0	0	0	0	0	0	0	0	100	0
PF01053	0	0	0	0	0	0	0	33.3	0	66.6
PF01055	0	0	0	50	0	0	0	0	0	50
PF01058	0	0	50	0	0	0	0	0	0	50
PF01061	0	0	0	6.6	0	0	0	0	86.6	6.6
PF01063	0	0	16.6	0	0	0	0	16.6	0	66.6
PF01066	0	0	33.3	0	0	0	0	0	0	66.6
PF01067	0	0	0	0	0	0	0	0	100	0
PF01070	0	0	0	0	100	0	0	0	0	0
PF01071	0	0	0	0	0	0	0	0	0	100
PF01073	0	0	0	0	0	50	0	0	50	0
PF01074	0	0	0	50	0	0	50	0	0	0
PF01077	0	0	0	0	0	0	0	0	0	100
PF01078	0	0	0	0	0	0	0	0	0	100
PF01084	0	0	0	0	0	0	0	0	0	100
PF01088	0	100	0	0	0	0	0	0	0	0
PF01090	0	0	0	0	0	0	0	100	0	0
PF01094	0	0	0	100	0	0	0	0	0	0
PF01095	25	0	0	0	0	0	0	0	75	0
PF01096	0	100	0	0	0	0	0	0	0	0
PF01103	0	0	0	0	0	0	0	0	0	100
PF01105	0	0	0	33.3	0	66.6	0	0	0	0
PF01106	0	0	40	0	0	0	0	0	0	60
PF01113	0	0	0	0	0	0	0	0	0	100
PF01116	0	100	0	0	0	0	0	0	0	0
PF01118	0	0	0	0	0	0	0	0	0	100
PF01119	0	100	0	0	0	0	0	0	0	0
PF01120	0	0	0	100	0	0	0	0	0	0
PF01124	0	0	0	100	0	0	0	0	0	0
PF01126	0	0	0	0	0	0	0	0	0	100
PF01127	0	0	100	0	0	0	0	0	0	0
PF01128	0	0	0	0	0	0	0	0	0	100
PF01132	0	0	0	0	0	0	0	0	0	100
PF01138	0	66.6	0	0	0	0	0	0	0	33.3
PF01145	0	0	61.5	0	0	0	0	0	38.4	0
PF01148	0	0	0	0	0	0	0	0	0	100
PF01150	0	0	0	50	0	0	50	0	0	0
PF01156	0	0	0	0	0	0	0	100	0	0
PF01157	0	0	0	0	0	0	0	100	0	0
PF01158	0	0	0	0	0	0	0	100	0	0
PF01161	0	100	0	0	0	0	0	0	0	0
PF01162	0	0	0	0	0	0	0	0	0	100
PF01165	0	0	0	0	0	0	0	0	0	100
PF01167	0	0	0	0	0	0	0	0	100	0
PF01169	0	0	0	0	0	0	0	0	0	100
PF01174	0	0	0	0	0	0	0	100	0	0
PF01176	0	0	0	0	0	0	0	0	0	100
PF01177	0	0	0	0	0	0	0	0	0	100
PF01179	0	0	0	50	50	0	0	0	0	0
PF01180	0	0	50	0	0	0	0	0	0	50
PF01182	0	0	0	0	0	0	0	0	50	50
PF01187	0	0	0	0	33.3	0	0	0	0	66.6
PF01188	0	0	0	0	0	0	0	0	0	100
PF01189	0	100	0	0	0	0	0	0	0	0
PF01190	0	0	0	0	0	0	0	0	100	0
PF01193	0	75	0	0	0	0	0	0	0	25
PF01195	0	0	0	0	0	0	0	0	0	100
PF01196	0	0	0	0	0	0	0	0	0	100
PF01197	0	0	0	0	0	0	0	0	0	100
PF01198	0	0	0	0	0	0	0	100	0	0
PF01199	0	0	0	0	0	0	0	100	0	0
PF01200	0	0	0	0	0	0	0	100	0	0
PF01201	0	0	0	0	0	0	0	100	0	0
PF01202	0	0	0	0	0	0	0	0	0	100
PF01207	0	50	0	50	0	0	0	0	0	0
PF01208	0	0	0	0	0	0	0	0	0	100
PF01209	0	0	50	0	0	0	0	0	0	50
PF01210	0	0	0	0	0	0	0	100	0	0
PF01214	0	100	0	0	0	0	0	0	0	0
PF01215	0	0	100	0	0	0	0	0	0	0
PF01217	0	0	0	0	0	0	0	0	100	0
PF01218	0	0	0	0	0	0	0	0	0	100
PF01225	0	0	0	0	0	0	0	0	0	100
PF01230	0	0	0	0	66.6	0	0	0	0	33.3
PF01233	0	0	0	0	0	0	0	100	0	0
PF01237	0	0	0	0	0	100	0	0	0	0
PF01241	0	0	0	0	0	0	0	0	0	100
PF01243	0	0	0	0	0	0	0	0	0	100
PF01245	0	0	0	0	0	0	0	0	0	100
PF01247	0	0	0	0	0	0	0	100	0	0
PF01248	0	42.8	0	0	0	0	0	57.1	0	0
PF01249	0	0	0	0	0	0	0	100	0	0
PF01250	0	0	0	0	0	0	0	0	0	100
PF01255	0	0	0	0	0	0	0	0	0	100
PF01257	0	0	100	0	0	0	0	0	0	0
PF01259	0	0	0	0	0	0	0	0	0	100
PF01262	0	0	0	0	0	0	0	100	0	0
PF01263	0	0	0	0	0	0	0	0	50	50
PF01266	0	0	50	0	0	0	0	0	0	50
PF01267	0	100	0	0	0	0	0	0	0	0
PF01269	0	100	0	0	0	0	0	0	0	0
PF01277	100	0	0	0	0	0	0	0	0	0
PF01280	0	0	0	0	0	0	0	100	0	0
PF01281	0	0	0	0	0	0	0	0	0	100
PF01282	0	0	0	0	0	0	0	100	0	0
PF01283	0	0	0	0	0	0	0	100	0	0
PF01287	0	100	0	0	0	0	0	0	0	0
PF01288	0	0	0	0	0	0	0	100	0	0
PF01293	0	100	0	0	0	0	0	0	0	0
PF01294	0	0	0	0	0	0	0	100	0	0
PF01301	66.6	0	0	33.3	0	0	0	0	0	0
PF01302	0	50	0	0	0	0	0	0	0	50
PF01305	0	0	0	0	0	0	0	0	0	100
PF01321	0	0	0	0	0	0	0	0	50	50
PF01326	0	0	0	0	0	0	0	0	0	100
PF01327	0	0	50	0	0	0	0	0	0	50
PF01329	0	0	0	0	0	0	0	0	0	100
PF01333	0	0	0	0	0	0	0	0	0	100
PF01336	0	42.8	0	0	0	0	0	0	14.2	42.8
PF01343	0	0	0	0	0	0	0	0	0	100
PF01344	0	25	0	0	8.3	0	16.6	16.6	16.6	16.6
PF01357	0	0	0	0	0	0	0	0	0	100
PF01363	0	0	50	0	0	0	0	0	50	0
PF01369	0	0	0	0	0	0	0	0	0	100
PF01370	4.3	0	4.3	0	0	0	13	13	26	39.1
PF01373	0	0	0	0	0	0	0	0	0	100
PF01381	0	100	0	0	0	0	0	0	0	0
PF01384	0	0	0	0	0	0	0	0	0	100
PF01388	0	0	0	50	0	0	0	0	0	50
PF01394	0	0	0	0	0	0	0	0	50	50
PF01397	0	0	0	0	33.3	0	0	0	0	66.6
PF01398	0	50	0	0	0	0	0	0	0	50
PF01399	0	50	0	0	0	0	0	0	50	0
PF01405	0	0	0	0	0	0	0	0	0	100
PF01406	0	0	0	0	0	0	0	0	0	100
PF01409	0	0	0	0	0	0	0	0	0	100
PF01411	0	0	0	0	0	0	0	0	0	100
PF01412	0	0	0	0	0	0	0	50	50	0
PF01417	0	0	0	0	0	0	0	0	100	0
PF01419	0	40	0	20	0	0	0	0	0	40
PF01422	0	100	0	0	0	0	0	0	0	0
PF01423	0	87.5	0	0	0	0	0	0	12.5	0
PF01424	0	100	0	0	0	0	0	0	0	0
PF01425	0	0	50	0	0	0	0	0	0	50
PF01426	0	100	0	0	0	0	0	0	0	0
PF01429	0	100	0	0	0	0	0	0	0	0
PF01432	0	0	0	0	0	0	0	0	0	100
PF01433	0	0	0	0	0	0	0	0	50	50
PF01434	0	0	20	0	0	0	0	0	0	80
PF01435	0	0	0	0	0	100	0	0	0	0
PF01436	0	0	0	0	0	0	0	0	0	100
PF01448	0	0	0	100	0	0	0	0	0	0
PF01450	0	0	0	0	0	0	0	0	0	100
PF01451	0	0	0	0	0	0	0	0	0	100
PF01453	11.1	11.1	0	0	0	0	0	11.1	66.6	0
PF01458	0	0	0	0	0	0	0	0	0	100
PF01459	0	0	100	0	0	0	0	0	0	0
PF01465	0	0	0	0	0	0	100	0	0	0
PF01466	0	100	0	0	0	0	0	0	0	0
PF01467	0	0	50	0	0	0	0	0	0	50
PF01471	0	0	0	0	0	0	0	0	50	50
PF01474	0	0	0	0	0	0	0	0	0	100
PF01476	0	0	0	0	0	0	0	0	100	0
PF01477	0	0	0	0	0	0	0	0	0	100
PF01479	0	0	14.2	0	0	0	0	14.2	14.2	57.1
PF01486	0	88.8	0	0	0	0	0	0	11.1	0
PF01487	0	0	0	0	0	0	0	0	0	100
PF01488	0	0	0	0	0	0	0	0	0	100
PF01490	0	0	0	0	0	0	0	0	92.3	7.6
PF01493	0	0	0	0	0	0	0	0	0	100
PF01494	0	0	0	0	0	0	0	0	0	100
PF01496	0	0	0	100	0	0	0	0	0	0
PF01501	0	0	0	0	0	20	80	0	0	0
PF01502	0	0	0	0	0	0	0	0	0	100
PF01503	0	0	0	0	0	0	0	0	0	100
PF01504	0	0	20	0	0	0	0	0	80	0
PF01507	0	0	0	0	0	0	0	0	0	100
PF01512	0	0	100	0	0	0	0	0	0	0
PF01513	0	0	0	0	0	0	0	50	0	50
PF01521	0	0	0	0	0	0	0	0	0	100
PF01529	0	0	0	0	0	0	0	0	100	0
PF01532	0	0	0	0	0	0	100	0	0	0
PF01535	0	4.7	30.9	2.3	0	0	0	0	4.7	57.1
PF01544	0	0	0	25	0	0	0	0	50	25
PF01545	0	0	0	66.6	0	0	0	0	33.3	0
PF01546	0	0	0	33.3	0	66.6	0	0	0	0
PF01549	0	100	0	0	0	0	0	0	0	0
PF01553	0	0	20	0	0	20	0	0	20	40
PF01554	0	0	0	9	0	0	0	0	63.6	27.2
PF01556	0	0	16.6	0	0	0	0	0	33.3	50
PF01557	0	0	100	0	0	0	0	0	0	0
PF01564	0	0	0	0	0	0	0	0	100	0
PF01565	0	0	42.8	28.5	0	14.2	0	0	14.2	0
PF01566	0	0	0	100	0	0	0	0	0	0
PF01569	0	0	0	0	0	0	0	0	100	0
PF01571	0	0	0	0	0	0	0	0	0	100
PF01575	0	0	0	0	100	0	0	0	0	0
PF01578	0	0	100	0	0	0	0	0	0	0
PF01582	0	14.2	28.5	0	0	14.2	0	0	14.2	28.5
PF01583	0	0	0	0	0	0	0	0	0	100
PF01585	0	100	0	0	0	0	0	0	0	0
PF01588	0	0	0	0	0	0	0	0	0	100
PF01590	0	75	0	0	0	25	0	0	0	0
PF01592	0	0	100	0	0	0	0	0	0	0
PF01593	0	12.5	0	0	25	0	0	0	0	62.5
PF01595	0	0	33.3	0	0	0	0	0	66.6	0
PF01597	0	0	100	0	0	0	0	0	0	0
PF01599	0	0	0	0	0	0	0	100	0	0
PF01602	0	0	0	0	0	0	0	0	80	20
PF01603	0	33.3	33.3	0	33.3	0	0	0	0	0
PF01619	0	0	100	0	0	0	0	0	0	0
PF01624	0	0	0	0	0	0	0	0	100	0
PF01625	0	0	0	0	0	0	0	50	0	50
PF01627	0	100	0	0	0	0	0	0	0	0
PF01632	0	0	0	0	0	0	0	0	0	100
PF01634	0	0	0	0	0	0	0	0	0	100
PF01636	0	0	0	0	0	0	0	0	0	100
PF01641	0	33.3	0	0	0	0	0	0	0	66.6
PF01645	0	0	0	0	0	0	0	0	0	100
PF01649	0	0	0	0	0	0	0	0	0	100
PF01650	50	0	0	50	0	0	0	0	0	0
PF01652	0	100	0	0	0	0	0	0	0	0
PF01655	0	0	0	0	0	0	0	100	0	0
PF01656	0	0	0	0	0	0	0	0	0	100
PF01657	13	0	4.3	8.6	0	0	0	0	69.5	4.3
PF01663	0	0	0	100	0	0	0	0	0	0
PF01667	0	0	0	0	0	0	0	100	0	0
PF01678	0	0	0	0	0	0	0	0	0	100
PF01680	0	0	0	0	0	0	0	50	50	0
PF01694	0	0	20	0	0	0	40	0	20	20
PF01697	0	0	0	100	0	0	0	0	0	0
PF01699	0	0	0	100	0	0	0	0	0	0
PF01701	0	0	0	0	0	0	0	0	0	100
PF01704	0	0	0	0	0	0	0	0	100	0
PF01709	0	0	0	0	0	0	0	0	0	100
PF01712	0	100	0	0	0	0	0	0	0	0
PF01715	0	0	0	0	0	0	0	100	0	0
PF01716	0	0	0	0	0	0	0	0	0	100
PF01717	0	0	0	0	0	0	0	100	0	0
PF01722	0	0	0	0	0	0	0	0	0	100
PF01729	0	0	0	0	0	0	0	0	0	100
PF01733	0	0	0	0	0	0	0	0	100	0
PF01737	0	0	0	0	0	0	0	0	0	100
PF01738	0	0	0	0	0	0	0	0	0	100
PF01740	0	0	0	0	0	0	0	0	100	0
PF01743	0	0	50	0	0	0	0	0	0	50
PF01747	0	0	0	0	0	0	0	0	0	100
PF01749	0	100	0	0	0	0	0	0	0	0
PF01751	0	0	100	0	0	0	0	0	0	0
PF01753	0	100	0	0	0	0	0	0	0	0
PF01756	0	0	0	0	100	0	0	0	0	0
PF01758	0	0	0	0	0	0	0	0	0	100
PF01761	0	0	0	0	0	0	0	0	0	100
PF01762	0	0	0	0	0	0	66.6	0	0	33.3
PF01764	0	0	0	0	0	0	0	0	16.6	83.3
PF01765	0	0	50	0	0	0	0	0	0	50
PF01775	0	0	0	0	0	0	0	66.6	33.3	0
PF01776	0	0	0	0	0	0	0	100	0	0
PF01777	0	0	0	0	0	0	0	100	0	0
PF01779	0	0	0	0	0	0	0	100	0	0
PF01780	0	0	0	0	0	0	0	100	0	0
PF01781	0	0	0	0	0	0	0	100	0	0
PF01782	0	0	0	0	0	0	0	0	0	100
PF01786	0	0	100	0	0	0	0	0	0	0
PF01789	0	0	0	0	0	0	0	0	0	100
PF01794	0	0	0	12.5	0	0	0	0	75	12.5
PF01798	0	100	0	0	0	0	0	0	0	0
PF01805	0	100	0	0	0	0	0	0	0	0
PF01808	0	0	0	0	0	0	0	0	0	100
PF01812	0	0	50	0	0	0	0	0	0	50
PF01813	0	0	0	100	0	0	0	0	0	0
PF01820	0	0	0	0	0	0	0	0	0	100
PF01823	0	0	0	0	0	0	0	0	100	0
PF01839	0	0	0	0	0	0	0	0	100	0
PF01841	0	0	0	0	0	0	0	50	0	50
PF01842	0	0	11.1	0	0	0	0	22.2	0	66.6
PF01843	0	0	0	0	100	0	0	0	0	0
PF01846	0	100	0	0	0	0	0	0	0	0
PF01851	0	0	0	0	0	0	0	33.3	66.6	0
PF01852	0	77.7	0	0	0	0	0	0	22.2	0
PF01853	0	100	0	0	0	0	0	0	0	0
PF01857	0	0	0	0	0	0	0	100	0	0
PF01858	0	0	0	0	0	0	0	100	0	0
PF01873	0	50	0	0	0	0	0	0	50	0
PF01883	0	0	0	0	0	0	0	0	0	100
PF01894	0	0	0	0	0	0	0	0	0	100
PF01900	0	0	0	100	0	0	0	0	0	0
PF01903	0	0	0	0	0	0	0	0	0	100
PF01907	0	0	0	0	0	0	0	100	0	0
PF01909	0	100	0	0	0	0	0	0	0	0
PF01912	0	100	0	0	0	0	0	0	0	0
PF01915	50	0	0	25	0	0	0	0	25	0
PF01926	0	11.1	0	0	0	0	0	11.1	0	77.7
PF01940	0	0	0	0	0	0	0	0	0	100
PF01946	0	0	0	0	0	0	0	0	0	100
PF01960	0	0	0	0	0	0	0	0	0	100
PF01964	0	0	0	0	0	0	0	0	0	100
PF01965	0	0	0	0	0	0	0	0	33.3	66.6
PF01966	0	0	0	0	0	0	0	0	0	100
PF01979	0	0	0	0	0	50	0	0	0	50
PF01985	0	0	0	0	0	0	0	0	0	100
PF01987	0	0	0	0	0	100	0	0	0	0
PF01988	0	0	0	100	0	0	0	0	0	0
PF01991	0	0	0	100	0	0	0	0	0	0
PF01992	0	0	0	100	0	0	0	0	0	0
PF01997	0	0	0	0	0	0	0	0	0	100
PF02020	0	100	0	0	0	0	0	0	0	0
PF02033	0	0	0	0	0	0	0	0	0	100
PF02036	0	0	0	0	100	0	0	0	0	0
PF02037	0	50	0	0	0	0	0	0	0	50
PF02045	0	100	0	0	0	0	0	0	0	0
PF02046	0	0	100	0	0	0	0	0	0	0
PF02065	50	0	0	50	0	0	0	0	0	0
PF02071	0	0	0	0	0	0	0	0	100	0
PF02089	0	0	0	100	0	0	0	0	0	0
PF02091	0	0	0	0	0	0	0	0	0	100
PF02092	0	0	0	0	0	0	0	0	0	100
PF02096	0	0	33.3	0	0	0	0	0	0	66.6
PF02104	0	0	100	0	0	0	0	0	0	0
PF02109	0	0	0	0	0	100	0	0	0	0
PF02134	0	0	0	0	0	0	0	50	50	0
PF02135	0	0	0	0	0	0	0	0	100	0
PF02136	0	33.3	0	0	0	0	0	0	33.3	33.3
PF02138	0	0	50	0	0	0	0	0	0	50
PF02140	0	0	0	100	0	0	0	0	0	0
PF02142	0	0	0	0	0	0	0	0	0	100
PF02148	0	0	0	0	0	0	0	0	0	100
PF02150	0	100	0	0	0	0	0	0	0	0
PF02151	0	0	0	0	0	0	0	0	0	100
PF02153	0	0	0	0	0	0	0	0	0	100
PF02162	0	0	0	0	0	0	0	0	100	0
PF02163	0	0	0	0	0	0	0	0	0	100
PF02167	0	0	100	0	0	0	0	0	0	0
PF02170	0	100	0	0	0	0	0	0	0	0
PF02171	0	100	0	0	0	0	0	0	0	0
PF02176	0	0	0	0	0	0	0	0	0	100
PF02178	0	50	0	0	0	0	0	50	0	0
PF02179	0	0	100	0	0	0	0	0	0	0
PF02181	0	0	0	0	0	0	0	0	100	0
PF02182	0	100	0	0	0	0	0	0	0	0
PF02183	0	100	0	0	0	0	0	0	0	0
PF02184	0	100	0	0	0	0	0	0	0	0
PF02190	0	0	33.3	0	16.6	0	0	0	0	50
PF02195	0	0	0	0	0	0	0	0	0	100
PF02209	0	0	0	0	0	0	0	0	0	0
PF02212	0	0	0	0	0	0	0	0	100	0
PF02213	0	0	0	0	0	0	0	0	0	100
PF02221	0	0	0	100	0	0	0	0	0	0
PF02222	0	0	0	0	0	0	0	0	0	100
PF02225	38.4	0	7.6	23	0	0	7.6	0	23	0
PF02234	0	100	0	0	0	0	0	0	0	0
PF02254	0	0	0	0	0	0	0	0	0	100
PF02259	0	0	0	0	0	0	0	0	0	100
PF02260	0	0	0	0	0	0	0	0	0	100
PF02270	0	0	100	0	0	0	0	0	0	0
PF02271	0	0	100	0	0	0	0	0	0	0
PF02272	0	0	0	0	0	0	0	0	0	100
PF02296	0	0	0	0	0	0	0	0	100	0
PF02297	0	0	50	0	0	0	0	0	0	50
PF02298	22.2	0	0	0	0	0	0	0	77.7	0
PF02301	0	100	0	0	0	0	0	0	0	0
PF02309	0	100	0	0	0	0	0	0	0	0
PF02319	0	100	0	0	0	0	0	0	0	0
PF02320	0	0	100	0	0	0	0	0	0	0
PF02325	0	0	0	0	0	0	0	0	0	100
PF02326	0	0	100	0	0	0	0	0	0	0
PF02330	0	0	100	0	0	0	0	0	0	0
PF02338	0	0	0	0	0	0	0	0	100	0
PF02348	0	0	100	0	0	0	0	0	0	0
PF02353	0	0	0	0	0	0	0	0	50	50
PF02357	0	0	0	0	0	0	0	0	0	100
PF02358	0	0	100	0	0	0	0	0	0	0
PF02359	0	0	0	100	0	0	0	0	0	0
PF02361	0	0	0	0	0	0	0	0	0	100
PF02362	10	60	0	10	0	0	0	0	0	20
PF02364	0	0	0	0	0	0	0	0	100	0
PF02365	0	93.7	0	0	0	0	0	0	6.2	0
PF02373	0	100	0	0	0	0	0	0	0	0
PF02374	0	0	0	0	0	0	0	0	0	100
PF02375	0	100	0	0	0	0	0	0	0	0
PF02383	0	0	0	0	0	0	50	0	50	0
PF02386	0	0	0	0	0	0	0	0	100	0
PF02392	0	0	0	0	0	0	0	0	0	100
PF02401	0	0	0	0	0	0	0	0	0	100
PF02403	0	0	0	0	0	0	0	0	0	100
PF02405	0	0	0	0	0	0	0	0	0	100
PF02410	0	0	0	0	0	0	0	0	0	100
PF02416	0	0	0	0	0	0	0	0	0	100
PF02419	0	0	0	0	0	0	0	0	0	100
PF02423	0	0	0	0	0	0	0	0	0	100
PF02427	0	0	0	0	0	0	0	0	0	100
PF02431	0	0	0	0	0	0	0	0	0	100
PF02439	0	0	0	0	0	0	0	0	100	0
PF02445	0	0	0	0	0	0	0	0	0	100
PF02446	0	0	0	0	0	0	0	50	0	50
PF02453	0	0	12.5	0	0	12.5	0	0	75	0
PF02458	0	50	0	0	0	0	0	0	0	50
PF02460	0	0	0	50	0	0	0	0	50	0
PF02463	0	0	0	0	0	0	0	0	0	100
PF02466	0	0	42.8	0	0	0	0	0	0	57.1
PF02469	0	0	0	18.1	0	0	0	0	81.8	0
PF02470	0	0	0	0	0	0	0	0	0	100
PF02482	0	0	0	0	0	0	0	0	0	100
PF02492	0	0	0	0	0	0	0	0	0	100
PF02493	0	0	0	0	0	0	0	0	66.6	33.3
PF02502	0	100	0	0	0	0	0	0	0	0
PF02507	0	0	0	0	0	0	0	0	0	100
PF02514	0	0	0	0	0	0	0	0	0	100
PF02517	0	50	0	0	0	50	0	0	0	0
PF02518	0	38.4	23	7.6	0	7.6	0	0	7.6	15.3
PF02519	0	33.3	0	0	33.3	0	0	0	33.3	0
PF02531	0	0	0	0	0	0	0	0	0	100
PF02535	0	0	0	0	0	0	0	0	100	0
PF02536	0	0	0	0	0	0	0	0	0	100
PF02537	0	0	0	0	0	0	0	0	100	0
PF02542	0	0	0	0	0	0	0	0	0	100
PF02544	0	0	0	0	0	66.6	0	0	0	33.3
PF02545	0	0	0	0	0	0	0	0	0	100
PF02548	0	0	100	0	0	0	0	0	0	0
PF02551	0	0	0	0	100	0	0	0	0	0
PF02569	0	0	0	0	0	0	0	100	0	0
PF02574	0	0	0	0	0	0	0	0	100	0
PF02575	0	0	0	0	0	0	0	0	0	100
PF02581	0	0	0	0	0	0	0	0	0	100
PF02582	0	0	100	0	0	0	0	0	0	0
PF02602	0	0	0	0	0	0	0	0	0	100
PF02605	0	0	0	0	0	0	0	0	0	100
PF02622	0	0	0	0	0	0	0	0	0	100
PF02629	0	0	100	0	0	0	0	0	0	0
PF02637	0	0	0	0	0	0	0	0	0	100
PF02657	0	0	0	0	0	0	0	0	0	100
PF02666	0	0	33.3	33.3	0	33.3	0	0	0	0
PF02668	0	100	0	0	0	0	0	0	0	0
PF02670	0	0	0	0	0	0	0	0	0	100
PF02671	0	0	0	0	0	0	0	50	0	50
PF02672	0	0	0	0	0	0	0	0	0	100
PF02678	0	0	0	0	0	0	0	0	100	0
PF02696	0	0	0	0	0	0	0	0	0	100
PF02701	0	100	0	0	0	0	0	0	0	0
PF02705	0	0	0	0	0	0	0	0	83.3	16.6
PF02714	0	0	0	0	0	0	0	0	100	0
PF02727	0	0	0	50	50	0	0	0	0	0
PF02728	0	0	0	50	50	0	0	0	0	0
PF02729	0	0	0	0	0	0	0	0	0	100
PF02731	0	100	0	0	0	0	0	0	0	0
PF02732	0	100	0	0	0	0	0	0	0	0
PF02736	0	0	0	50	50	0	0	0	0	0
PF02737	0	0	0	0	100	0	0	0	0	0
PF02746	0	0	0	0	0	0	0	0	0	100
PF02747	0	100	0	0	0	0	0	0	0	0
PF02749	0	0	0	0	0	0	0	0	0	100
PF02769	0	0	0	0	0	0	0	0	0	100
PF02770	0	0	33.3	0	66.6	0	0	0	0	0
PF02771	0	0	50	0	50	0	0	0	0	0
PF02772	0	25	0	0	0	0	0	0	75	0
PF02773	0	25	0	0	0	0	0	0	75	0
PF02774	0	0	0	0	0	0	0	0	0	100
PF02775	0	0	0	0	0	0	0	0	0	100
PF02776	0	0	0	0	0	0	0	0	0	100
PF02777	0	0	25	0	0	0	0	0	0	75
PF02779	0	0	37.5	0	0	0	0	0	0	62.5
PF02780	0	0	16.6	0	0	0	0	0	0	83.3
PF02781	0	0	0	0	0	0	0	0	0	100
PF02782	0	0	0	0	0	0	0	33.3	0	66.6
PF02784	0	0	0	0	0	0	0	0	0	100
PF02785	0	0	33.3	0	0	0	0	0	33.3	33.3
PF02786	0	0	25	0	0	0	0	0	25	50
PF02787	0	0	0	0	0	0	0	0	0	100
PF02788	0	0	0	0	0	0	0	0	0	100
PF02789	0	0	0	50	0	0	0	0	0	50
PF02791	0	0	0	0	0	0	0	0	0	100
PF02792	0	100	0	0	0	0	0	0	0	0
PF02797	0	0	0	0	0	100	0	0	0	0
PF02798	0	0	20	0	10	0	0	0	40	30
PF02799	0	0	0	0	0	0	0	100	0	0
PF02800	0	0	0	0	0	0	0	0	0	100
PF02801	0	0	0	0	0	0	0	0	0	100
PF02803	0	0	0	0	100	0	0	0	0	0
PF02806	0	0	0	0	0	0	0	0	0	100
PF02809	0	0	0	0	0	0	0	100	0	0
PF02812	0	0	100	0	0	0	0	0	0	0
PF02815	0	0	0	0	0	100	0	0	0	0
PF02817	0	0	66.6	0	0	0	0	0	0	33.3
PF02823	0	0	50	0	0	0	0	0	0	50
PF02824	0	0	0	0	0	0	0	0	0	100
PF02825	0	100	0	0	0	0	0	0	0	0
PF02826	0	0	50	0	50	0	0	0	0	0
PF02836	0	0	0	0	0	0	0	0	0	100
PF02837	0	0	0	50	0	0	0	0	0	50
PF02838	0	0	0	33.3	0	0	0	0	66.6	0
PF02843	0	0	0	0	0	0	0	0	0	100
PF02844	0	0	0	0	0	0	0	0	0	100
PF02845	0	0	0	0	0	0	0	0	100	0
PF02847	0	100	0	0	0	0	0	0	0	0
PF02852	0	0	33.3	0	16.6	0	0	0	0	50
PF02854	0	100	0	0	0	0	0	0	0	0
PF02861	0	0	0	0	0	0	0	0	0	100
PF02862	0	0	0	100	0	0	0	0	0	0
PF02866	0	0	16.6	0	16.6	0	0	0	33.3	33.3
PF02874	0	0	60	0	0	0	0	0	0	40
PF02875	0	0	0	0	0	0	0	0	0	100
PF02877	0	100	0	0	0	0	0	0	0	0
PF02878	0	0	0	0	0	0	0	0	0	100
PF02879	0	0	0	0	0	0	0	0	0	100
PF02880	0	0	0	0	0	0	0	0	0	100
PF02881	0	0	0	0	0	33.3	0	0	0	66.6
PF02882	0	0	0	0	0	0	0	0	0	100
PF02883	0	0	0	0	0	0	0	0	100	0
PF02885	0	0	0	0	0	0	0	0	0	100
PF02887	0	0	16.6	0	0	0	0	0	33.3	50
PF02889	0	50	0	0	0	50	0	0	0	0
PF02891	0	100	0	0	0	0	0	0	0	0
PF02896	0	0	0	0	0	0	0	0	0	100
PF02897	0	0	0	0	0	0	0	0	0	100
PF02902	0	75	0	0	0	0	0	0	0	25
PF02910	0	0	66.6	0	0	0	0	0	0	33.3
PF02913	0	0	100	0	0	0	0	0	0	0
PF02915	0	0	0	0	0	0	0	0	0	100
PF02921	0	0	100	0	0	0	0	0	0	0
PF02922	0	0	0	0	0	0	0	0	0	100
PF02929	0	0	0	0	0	0	0	0	0	100
PF02933	0	0	0	100	0	0	0	0	0	0
PF02934	0	0	0	0	0	0	0	0	0	100
PF02938	0	0	0	0	0	0	0	0	0	100
PF02941	0	0	0	0	0	0	0	0	0	100
PF02943	0	0	0	0	0	0	0	0	0	100
PF02953	0	0	100	0	0	0	0	0	0	0
PF02966	0	100	0	0	0	0	0	0	0	0
PF02978	0	0	0	0	0	0	0	0	0	100
PF02984	0	75	0	0	0	0	0	0	25	0
PF02985	0	6.2	6.2	0	0	0	0	6.2	56.2	12.5
PF02990	0	0	0	0	0	0	100	0	0	0
PF02991	0	0	0	100	0	0	0	0	0	0
PF03000	0	0	0	0	0	0	0	0	100	0
PF03005	0	0	0	50	0	0	0	0	0	50
PF03007	0	0	0	0	0	100	0	0	0	0
PF03009	0	0	0	33.3	0	0	0	0	66.6	0
PF03015	0	0	0	0	0	50	0	0	0	50
PF03016	0	0	0	0	0	0	100	0	0	0
PF03029	0	0	0	0	0	0	0	0	0	0
PF03030	0	0	0	50	0	0	50	0	0	0
PF03031	0	75	25	0	0	0	0	0	0	0
PF03033	0	0	0	0	0	0	0	0	100	0
PF03055	0	0	0	0	0	0	0	0	12.5	87.5
PF03061	0	0	0	0	100	0	0	0	0	0
PF03062	0	0	0	0	0	0	0	0	50	50
PF03069	0	0	0	100	0	0	0	0	0	0
PF03071	0	0	0	0	0	0	100	0	0	0
PF03080	0	0	0	0	0	0	0	0	0	100
PF03081	0	0	0	0	0	0	0	0	100	0
PF03083	0	0	0	0	0	0	0	0	50	50
PF03088	0	0	0	0	0	75	0	0	25	0
PF03091	0	0	0	0	0	0	0	0	0	100
PF03092	0	0	0	0	0	0	0	0	0	100
PF03094	0	0	0	0	0	0	0	0	100	0
PF03099	0	0	100	0	0	0	0	0	0	0
PF03101	0	100	0	0	0	0	0	0	0	0
PF03104	100	0	0	0	0	0	0	0	0	0
PF03105	0	50	0	16.6	0	0	0	0	33.3	0
PF03106	0	81.8	0	0	0	0	0	0	9	9
PF03107	0	50	0	0	0	0	0	0	0	50
PF03109	0	0	0	0	0	0	0	0	0	100
PF03110	0	0	0	0	0	0	0	0	100	0
PF03118	0	0	0	0	0	0	0	0	0	100
PF03124	0	0	0	0	0	0	0	0	100	0
PF03126	0	100	0	0	0	0	0	0	0	0
PF03127	0	0	0	0	0	0	0	0	100	0
PF03129	0	0	25	0	0	0	0	0	0	75
PF03130	0	0	100	0	0	0	0	0	0	0
PF03133	0	0	0	0	0	0	0	0	0	100
PF03138	0	9	0	0	0	0	54.5	0	0	36.3
PF03140	0	0	0	0	0	0	0	0	100	0
PF03141	0	0	0	0	0	0	92.3	0	7.6	0
PF03143	0	0	33.3	33.3	0	0	0	0	0	33.3
PF03144	0	9	27.2	9	0	0	0	0	9	45.4
PF03145	0	0	50	0	0	0	0	0	50	0
PF03147	0	0	0	0	0	0	0	0	0	100
PF03151	0	0	0	0	0	0	37.5	0	37.5	25
PF03159	0	100	0	0	0	0	0	0	0	0
PF03167	0	0	100	0	0	0	0	0	0	0
PF03168	0	0	0	0	0	0	0	0	100	0
PF03169	0	0	0	0	0	0	0	0	100	0
PF03171	0	40	0	0	40	0	0	0	20	0
PF03178	0	75	0	0	0	0	0	0	0	25
PF03179	0	0	0	100	0	0	0	0	0	0
PF03181	0	0	0	100	0	0	0	0	0	0
PF03188	0	0	0	100	0	0	0	0	0	0
PF03190	0	0	0	0	0	0	0	0	0	100
PF03195	0	80	20	0	0	0	0	0	0	0
PF03200	0	0	0	0	0	100	0	0	0	0
PF03208	0	0	0	0	0	100	0	0	0	0
PF03214	0	0	0	0	0	0	100	0	0	0
PF03219	0	0	0	0	0	0	0	0	0	100
PF03223	0	0	0	100	0	0	0	0	0	0
PF03227	0	0	0	100	0	0	0	0	0	0
PF03244	0	0	0	0	0	0	0	0	0	100
PF03248	0	0	0	0	0	0	100	0	0	0
PF03255	0	0	0	0	0	0	0	0	0	100
PF03271	0	0	0	0	0	0	0	0	0	0
PF03297	0	0	0	0	0	0	0	100	0	0
PF03321	0	20	0	20	0	0	0	0	0	60
PF03330	0	0	0	0	0	0	0	0	0	100
PF03343	0	100	0	0	0	0	0	0	0	0
PF03350	0	0	0	0	0	0	0	0	0	100
PF03357	0	0	0	0	0	0	0	0	100	0
PF03358	0	0	0	0	0	0	0	0	0	100
PF03360	0	0	0	0	0	0	100	0	0	0
PF03364	0	0	33.3	0	0	0	0	0	0	66.6
PF03368	0	100	0	0	0	0	0	0	0	0
PF03372	0	40	0	0	0	0	0	0	20	40
PF03381	0	0	0	0	0	0	50	0	50	0
PF03386	0	0	100	0	0	0	0	0	0	0
PF03398	0	0	100	0	0	0	0	0	0	0
PF03399	0	0	0	0	0	0	0	0	0	100
PF03404	0	0	0	0	100	0	0	0	0	0
PF03405	0	0	0	0	0	0	0	0	0	100
PF03435	0	0	0	0	0	0	0	50	0	50
PF03441	0	100	0	0	0	0	0	0	0	0
PF03446	0	20	0	0	20	0	0	20	0	40
PF03447	0	0	0	0	0	0	0	0	0	100
PF03460	0	0	0	0	0	0	0	0	0	100
PF03462	0	0	0	0	0	0	0	0	0	100
PF03463	0	0	0	0	0	0	0	0	100	0
PF03464	0	0	0	0	0	0	0	0	100	0
PF03465	0	0	0	0	0	0	0	0	100	0
PF03468	0	0	100	0	0	0	0	0	0	0
PF03469	0	0	100	0	0	0	0	0	0	0
PF03478	0	0	0	0	0	0	0	0	0	100
PF03479	0	80	0	0	0	0	0	20	0	0
PF03485	0	0	0	0	0	0	0	0	0	100
PF03489	0	0	0	100	0	0	0	0	0	0
PF03501	0	0	0	0	0	0	0	100	0	0
PF03514	0	100	0	0	0	0	0	0	0	0
PF03531	0	100	0	0	0	0	0	0	0	0
PF03547	0	0	0	0	0	16.6	0	0	83.3	0
PF03552	0	0	0	0	0	0	30	0	60	10
PF03572	0	0	0	0	0	0	0	0	0	100
PF03595	0	0	0	0	0	0	0	0	100	0
PF03618	0	0	0	0	0	0	0	50	0	50
PF03634	0	75	0	0	0	0	0	0	0	25
PF03635	0	0	0	0	0	0	0	0	0	0
PF03637	0	100	0	0	0	0	0	0	0	0
PF03638	0	100	0	0	0	0	0	0	0	0
PF03643	0	0	0	0	0	0	0	0	0	0
PF03647	0	20	20	0	0	0	0	0	0	60
PF03649	0	0	0	0	0	0	0	0	100	0
PF03650	0	0	75	0	0	0	0	0	25	0
PF03651	0	0	0	0	0	0	0	0	0	100
PF03665	0	0	0	0	0	100	0	0	0	0
PF03690	0	0	100	0	0	0	0	0	0	0
PF03715	0	100	0	0	0	0	0	0	0	0
PF03719	0	0	0	0	0	0	16.6	66.6	0	16.6
PF03725	0	66.6	0	0	0	0	0	0	0	33.3
PF03726	0	0	0	0	0	0	0	0	0	100
PF03727	0	0	80	0	0	0	0	0	0	20
PF03741	0	0	0	0	0	0	0	0	0	100
PF03759	0	0	0	0	0	0	0	0	100	0
PF03763	0	16.6	0	0	0	0	0	0	83.3	0
PF03764	0	25	50	0	0	0	0	0	0	25
PF03765	0	0	0	0	0	0	0	0	85.7	14.2
PF03766	0	0	0	0	0	0	0	0	100	0
PF03767	0	0	0	100	0	0	0	0	0	0
PF03770	0	100	0	0	0	0	0	0	0	0
PF03776	0	0	0	0	0	0	0	0	0	100
PF03789	0	100	0	0	0	0	0	0	0	0
PF03790	0	100	0	0	0	0	0	0	0	0
PF03791	0	100	0	0	0	0	0	0	0	0
PF03798	0	0	0	0	0	100	0	0	0	0
PF03800	0	0	0	0	0	0	0	0	100	0
PF03810	0	66.6	0	0	0	0	0	0	0	33.3
PF03822	0	33.3	0	33.3	0	0	0	0	33.3	0
PF03835	0	0	0	0	0	0	0	0	0	100
PF03839	0	0	0	0	0	0	0	0	100	0
PF03847	0	100	0	0	0	0	0	0	0	0
PF03859	0	0	0	0	0	0	0	100	0	0
PF03874	0	100	0	0	0	0	0	0	0	0
PF03878	0	0	0	0	0	100	0	0	0	0
PF03881	0	0	0	0	0	0	0	0	0	100
PF03893	0	0	0	0	0	0	0	0	100	0
PF03909	0	0	0	0	0	0	0	0	0	100
PF03911	0	0	0	0	0	0	0	0	100	0
PF03912	0	0	0	0	0	0	0	0	0	100
PF03914	0	100	0	0	0	0	0	0	0	0
PF03918	0	0	100	0	0	0	0	0	0	0
PF03924	0	0	0	0	0	0	0	0	100	0
PF03931	0	100	0	0	0	0	0	0	0	0
PF03936	0	0	0	0	33.3	0	0	0	0	66.6
PF03939	0	0	0	0	0	0	0	100	0	0
PF03946	0	0	0	0	0	0	0	66.6	0	33.3
PF03947	0	0	0	0	0	0	0	50	0	50
PF03948	0	0	0	0	0	0	0	0	0	100
PF03949	0	0	66.6	0	0	0	0	0	0	33.3
PF03951	0	0	0	0	0	0	0	0	33.3	66.6
PF03952	0	50	0	0	0	0	0	0	0	50
PF03953	0	0	0	8.3	0	0	0	16.6	50	25
PF03959	0	0	0	0	100	0	0	0	0	0
PF03981	0	0	100	0	0	0	0	0	0	0
PF03989	0	0	0	0	0	0	0	0	0	100
PF03999	0	0	0	0	0	0	0	0	0	0
PF04003	0	100	0	0	0	0	0	0	0	0
PF04004	0	0	0	0	0	0	0	100	0	0
PF04006	0	100	0	0	0	0	0	0	0	0
PF04012	0	0	0	0	0	0	0	0	0	100
PF04030	0	0	100	0	0	0	0	0	0	0
PF04042	0	0	100	0	0	0	0	0	0	0
PF04043	20	0	0	20	0	0	0	0	60	0
PF04048	0	0	0	0	0	0	0	0	100	0
PF04053	0	0	0	0	0	0	0	0	100	0
PF04055	0	0	0	0	0	100	0	0	0	0
PF04057	0	100	0	0	0	0	0	0	0	0
PF04059	0	100	0	0	0	0	0	0	0	0
PF04086	0	0	0	0	0	100	0	0	0	0
PF04091	0	0	0	0	0	0	0	0	100	0
PF04096	0	100	0	0	0	0	0	0	0	0
PF04097	0	100	0	0	0	0	0	0	0	0
PF04100	0	0	100	0	0	0	0	0	0	0
PF04101	0	0	0	0	0	0	0	0	0	100
PF04107	0	0	0	0	0	0	0	0	0	100
PF04113	0	0	0	0	0	100	0	0	0	0
PF04114	0	0	0	0	0	100	0	0	0	0
PF04116	0	0	0	0	0	33.3	0	0	33.3	33.3
PF04117	0	0	0	0	33.3	0	0	0	0	66.6
PF04129	0	0	0	0	0	0	100	0	0	0
PF04133	0	0	0	100	0	0	0	0	0	0
PF04134	0	0	0	0	0	0	0	0	0	100
PF04135	0	100	0	0	0	0	0	0	0	0
PF04137	0	0	0	0	0	100	0	0	0	0
PF04140	0	0	0	0	0	100	0	0	0	0
PF04144	0	0	0	0	0	0	0	0	100	0
PF04145	0	0	0	50	0	0	0	0	50	0
PF04146	0	100	0	0	0	0	0	0	0	0
PF04153	0	100	0	0	0	0	0	0	0	0
PF04161	0	0	0	0	0	100	0	0	0	0
PF04172	0	0	0	0	0	0	0	0	0	100
PF04185	0	0	0	33.3	0	0	0	33.3	33.3	0
PF04187	0	0	0	0	0	0	0	0	0	100
PF04193	0	0	0	0	0	0	0	0	100	0
PF04212	0	0	0	0	0	0	0	0	0	0
PF04253	0	0	0	100	0	0	0	0	0	0
PF04258	0	0	0	0	0	33.3	0	0	66.6	0
PF04263	0	0	0	0	0	0	0	100	0	0
PF04265	0	0	0	0	0	0	0	100	0	0
PF04278	0	0	0	0	0	0	0	0	0	100
PF04280	0	0	100	0	0	0	0	0	0	0
PF04389	0	0	0	100	0	0	0	0	0	0
PF04396	0	0	66.6	0	0	0	0	0	0	33.3
PF04398	16.6	16.6	0	66.6	0	0	0	0	0	0
PF04406	0	100	0	0	0	0	0	0	0	0
PF04408	0	66.6	0	0	0	0	0	0	0	33.3
PF04410	0	0	0	0	0	0	0	0	0	100
PF04418	0	0	100	0	0	0	0	0	0	0
PF04427	0	100	0	0	0	0	0	0	0	0
PF04433	0	100	0	0	0	0	0	0	0	0
PF04434	0	100	0	0	0	0	0	0	0	0
PF04438	0	100	0	0	0	0	0	0	0	0
PF04455	0	0	0	0	0	0	0	100	0	0
PF04499	0	0	0	0	0	0	0	0	100	0
PF04503	0	100	0	0	0	0	0	0	0	0
PF04504	0	100	0	0	0	0	0	0	0	0
PF04515	0	0	0	0	0	0	0	0	100	0
PF04520	0	0	0	0	0	0	0	0	0	100
PF04525	0	0	0	0	0	0	0	0	50	50
PF04526	0	0	0	0	0	0	0	0	100	0
PF04535	0	0	0	0	0	0	0	0	100	0
PF04536	0	0	0	0	0	0	0	0	0	100
PF04539	0	0	0	0	0	0	0	0	0	100
PF04542	0	0	0	0	0	0	0	0	0	100
PF04545	0	0	0	0	0	0	0	0	0	100
PF04548	0	0	0	0	0	0	0	0	16.6	83.3
PF04551	0	0	0	0	0	0	0	0	0	100
PF04560	0	50	0	0	0	0	0	0	0	50
PF04561	0	50	0	0	0	0	0	0	0	50
PF04563	0	50	0	0	0	0	0	0	0	50
PF04564	0	14.2	0	0	0	0	0	28.5	42.8	14.2
PF04565	0	50	0	0	0	0	0	0	0	50
PF04566	0	100	0	0	0	0	0	0	0	0
PF04567	0	100	0	0	0	0	0	0	0	0
PF04571	100	0	0	0	0	0	0	0	0	0
PF04573	0	0	0	0	0	100	0	0	0	0
PF04578	0	0	0	0	0	0	0	0	100	0
PF04597	0	0	0	0	0	50	0	0	50	0
PF04601	0	0	0	100	0	0	0	0	0	0
PF04607	0	0	0	0	0	0	0	0	0	100
PF04618	0	100	0	0	0	0	0	0	0	0
PF04627	0	0	100	0	0	0	0	0	0	0
PF04642	0	100	0	0	0	0	0	0	0	0
PF04646	0	0	0	0	0	0	100	0	0	0
PF04654	0	0	0	0	0	0	0	0	100	0
PF04685	0	0	0	66.6	0	0	0	0	33.3	0
PF04690	0	100	0	0	0	0	0	0	0	0
PF04715	0	0	0	0	0	0	0	0	0	100
PF04716	0	0	100	0	0	0	0	0	0	0
PF04718	0	0	100	0	0	0	0	0	0	0
PF04720	0	50	0	0	0	0	0	0	0	50
PF04722	0	0	0	0	0	0	0	0	0	100
PF04725	0	0	0	0	0	0	0	0	0	100
PF04733	0	0	0	0	0	0	0	0	100	0
PF04734	0	0	0	0	0	0	0	0	100	0
PF04749	0	0	0	16.6	0	0	0	0	83.3	0
PF04755	0	0	0	0	0	0	0	0	0	100
PF04757	0	0	0	0	100	0	0	0	0	0
PF04758	0	0	0	0	0	0	0	100	0	0
PF04760	0	0	0	0	0	0	0	0	0	100
PF04765	0	0	0	0	0	0	100	0	0	0
PF04774	0	50	0	0	0	0	0	0	50	0
PF04777	0	0	0	0	0	0	100	0	0	0
PF04780	0	50	50	0	0	0	0	0	0	0
PF04781	0	50	50	0	0	0	0	0	0	0
PF04782	0	0	0	0	0	0	0	0	100	0
PF04783	0	0	0	0	0	0	0	0	100	0
PF04784	0	0	0	33.3	0	0	0	0	0	66.6
PF04788	0	0	0	0	0	0	0	0	100	0
PF04800	0	0	100	0	0	0	0	0	0	0
PF04818	0	100	0	0	0	0	0	0	0	0
PF04824	0	100	0	0	0	0	0	0	0	0
PF04825	0	100	0	0	0	0	0	0	0	0
PF04832	0	0	0	0	0	0	0	0	33.3	66.6
PF04833	0	0	0	0	0	0	0	0	100	0
PF04836	0	100	0	0	0	0	0	0	0	0
PF04839	0	0	0	0	0	0	0	0	0	100
PF04840	0	0	0	100	0	0	0	0	0	0
PF04841	0	0	0	100	0	0	0	0	0	0
PF04844	0	0	0	0	0	0	0	0	100	0
PF04851	0	50	0	0	0	0	0	0	50	0
PF04852	0	100	0	0	0	0	0	0	0	0
PF04853	0	0	0	0	0	0	0	50	0	50
PF04855	0	100	0	0	0	0	0	0	0	0
PF04859	0	0	0	0	50	0	0	0	50	0
PF04862	0	0	0	0	0	0	0	0	100	0
PF04873	0	100	0	0	0	0	0	0	0	0
PF04884	0	0	0	0	0	0	0	0	0	100
PF04885	100	0	0	0	0	0	0	0	0	0
PF04893	0	0	0	0	0	0	0	0	100	0
PF04898	0	0	0	0	0	0	0	0	0	100
PF04909	0	0	0	0	0	0	0	0	0	100
PF04921	0	100	0	0	0	0	0	0	0	0
PF04926	0	100	0	0	0	0	0	0	0	0
PF04927	0	100	0	0	0	0	0	0	0	0
PF04928	0	100	0	0	0	0	0	0	0	0
PF04939	0	100	0	0	0	0	0	0	0	0
PF04949	0	0	0	0	0	0	0	0	100	0
PF04969	0	25	0	0	0	0	0	0	50	25
PF04982	0	0	0	0	0	0	0	0	0	100
PF04983	0	60	0	0	0	0	0	0	0	40
PF04987	0	0	0	0	0	100	0	0	0	0
PF04997	0	66.6	0	0	0	0	0	0	0	33.3
PF04998	0	66.6	0	0	0	0	0	0	0	33.3
PF05000	0	66.6	0	0	0	0	0	0	0	33.3
PF05002	0	50	0	0	0	0	0	0	50	0
PF05003	0	0	0	0	0	0	0	0	100	0
PF05004	0	100	0	0	0	0	0	0	0	0
PF05008	0	0	0	0	0	0	0	0	100	0
PF05022	0	100	0	0	0	0	0	0	0	0
PF05033	0	100	0	0	0	0	0	0	0	0
PF05042	100	0	0	0	0	0	0	0	0	0
PF05055	0	0	0	0	25	0	0	0	75	0
PF05071	0	0	100	0	0	0	0	0	0	0
PF05078	0	0	0	0	0	0	0	0	0	100
PF05089	0	0	0	100	0	0	0	0	0	0
PF05116	0	20	0	0	0	0	0	0	80	0
PF05147	0	0	0	0	0	0	0	0	100	0
PF05158	0	0	0	0	0	0	0	0	0	100
PF05162	0	0	0	0	0	0	0	100	0	0
PF05173	0	0	0	0	0	0	0	0	0	100
PF05175	0	100	0	0	0	0	0	0	0	0
PF05178	0	0	0	0	0	0	0	100	0	0
PF05183	0	100	0	0	0	0	0	0	0	0
PF05184	0	0	0	100	0	0	0	0	0	0
PF05187	0	0	100	0	0	0	0	0	0	0
PF05188	0	0	0	0	0	0	0	0	100	0
PF05190	0	50	0	0	0	0	0	0	50	0
PF05191	0	0	100	0	0	0	0	0	0	0
PF05192	0	66.6	0	0	0	0	0	0	33.3	0
PF05193	0	0	42.8	0	0	0	0	0	0	57.1
PF05198	0	0	0	0	0	0	0	0	0	100
PF05199	0	0	0	0	0	100	0	0	0	0
PF05201	0	0	0	0	0	0	0	0	0	100
PF05208	0	0	0	0	0	100	0	0	0	0
PF05221	0	0	0	0	0	0	0	0	100	0
PF05222	0	0	0	0	0	0	0	100	0	0
PF05239	0	0	0	0	0	0	0	0	0	100
PF05241	0	0	0	0	0	0	0	0	100	0
PF05266	0	0	0	100	0	0	0	0	0	0
PF05278	0	0	0	0	0	0	0	0	100	0
PF05292	0	0	0	0	100	0	0	0	0	0
PF05340	0	0	0	0	0	0	0	0	100	0
PF05347	0	0	100	0	0	0	0	0	0	0
PF05362	0	0	66.6	0	33.3	0	0	0	0	0
PF05365	0	0	100	0	0	0	0	0	0	0
PF05368	0	0	0	0	0	0	0	0	25	75
PF05383	0	100	0	0	0	0	0	0	0	0
PF05405	0	0	100	0	0	0	0	0	0	0
PF05406	0	100	0	0	0	0	0	0	0	0
PF05419	0	0	0	0	0	0	0	0	0	100
PF05462	0	0	0	0	0	0	0	0	100	0
PF05479	0	0	0	0	0	0	0	0	0	100
PF05493	0	0	0	100	0	0	0	0	0	0
PF05514	0	0	0	0	0	100	0	0	0	0
PF05542	0	0	0	0	0	0	0	0	0	100
PF05558	0	0	0	0	0	0	0	0	100	0
PF05562	0	0	0	33.3	0	0	0	0	33.3	33.3
PF05577	0	0	0	100	0	0	0	0	0	0
PF05602	0	0	0	0	0	100	0	0	0	0
PF05605	0	100	0	0	0	0	0	0	0	0
PF05620	0	0	0	0	0	0	0	0	100	0
PF05627	0	0	0	0	0	0	0	0	100	0
PF05631	0	0	0	0	0	0	0	0	100	0
PF05637	0	0	0	0	0	0	100	0	0	0
PF05641	0	0	0	100	0	0	0	0	0	0
PF05648	0	0	0	0	100	0	0	0	0	0
PF05653	0	0	0	0	0	0	0	0	100	0
PF05676	0	0	100	0	0	0	0	0	0	0
PF05678	0	100	0	0	0	0	0	0	0	0
PF05684	0	0	0	0	0	0	0	0	0	100
PF05687	0	0	0	100	0	0	0	0	0	0
PF05691	0	0	0	0	0	0	0	0	0	100
PF05695	0	0	0	0	0	0	0	0	0	100
PF05697	0	0	0	0	0	0	0	0	0	100
PF05698	0	0	0	0	0	0	0	0	0	100
PF05700	0	100	0	0	0	0	0	0	0	0
PF05701	0	0	0	0	0	0	0	0	100	0
PF05703	0	0	0	0	0	0	0	0	100	0
PF05705	0	0	0	0	100	0	0	0	0	0
PF05721	0	0	0	0	0	0	0	0	100	0
PF05724	0	0	0	0	0	0	0	0	50	50
PF05726	0	0	0	0	0	0	0	0	100	0
PF05739	0	7.1	0	21.4	0	0	14.2	0	50	0
PF05743	0	0	0	0	0	0	0	0	0	0
PF05746	0	0	0	0	0	0	0	0	0	100
PF05753	0	0	0	0	0	0	0	0	100	0
PF05755	0	0	0	100	0	0	0	0	0	0
PF05757	0	0	0	0	0	0	0	0	0	100
PF05758	0	0	0	0	0	0	0	0	0	100
PF05761	0	0	0	0	0	0	0	0	0	100
PF05770	0	100	0	0	0	0	0	0	0	0
PF05799	0	0	100	0	0	0	0	0	0	0
PF05859	0	100	0	0	0	0	0	0	0	0
PF05875	0	0	0	0	0	100	0	0	0	0
PF05879	0	0	0	0	0	50	0	0	50	0
PF05899	0	0	0	0	0	0	0	0	0	100
PF05903	0	0	0	0	0	0	0	0	100	0
PF05910	0	0	0	0	0	0	0	0	100	0
PF05911	0	0	0	0	0	0	0	0	100	0
PF05922	71.4	0	0	0	0	0	0	0	28.5	0
PF05971	0	100	0	0	0	0	0	0	0	0
PF05996	0	0	0	0	0	0	0	0	0	100
PF06017	0	0	0	0	0	0	0	0	100	0
PF06026	0	0	0	0	0	0	0	0	0	100
PF06045	0	0	0	0	0	0	0	0	100	0
PF06046	0	0	0	0	0	0	0	0	100	0
PF06068	0	50	0	0	0	0	0	0	0	50
PF06071	0	0	0	0	0	0	0	0	0	100
PF06094	0	0	0	0	0	0	0	0	100	0
PF06136	0	0	0	0	0	0	0	0	100	0
PF06148	0	0	0	100	0	0	0	0	0	0
PF06200	0	100	0	0	0	0	0	0	0	0
PF06203	0	85.7	0	0	0	0	0	0	14.2	0
PF06206	0	0	0	0	0	0	0	0	0	100
PF06212	0	0	100	0	0	0	0	0	0	0
PF06217	0	100	0	0	0	0	0	0	0	0
PF06219	0	0	0	0	0	0	0	0	100	0
PF06232	0	0	0	0	0	0	0	0	100	0
PF06241	0	0	0	0	0	0	0	0	0	100
PF06246	0	0	0	0	0	0	0	0	0	100
PF06258	0	0	100	0	0	0	0	0	0	0
PF06351	0	0	0	0	0	0	0	0	33.3	66.6
PF06364	0	0	0	0	0	0	100	0	0	0
PF06404	100	0	0	0	0	0	0	0	0	0
PF06405	0	0	0	0	0	0	0	0	0	100
PF06421	0	0	0	0	0	0	0	0	0	100
PF06424	0	100	0	0	0	0	0	0	0	0
PF06426	0	0	25	0	0	0	0	75	0	0
PF06427	0	0	0	0	0	100	0	0	0	0
PF06449	0	0	100	0	0	0	0	0	0	0
PF06455	0	0	100	0	0	0	0	0	0	0
PF06461	0	100	0	0	0	0	0	0	0	0
PF06465	0	100	0	0	0	0	0	0	0	0
PF06470	0	0	0	0	0	0	0	0	0	100
PF06472	0	0	0	0	50	0	0	0	0	50
PF06479	0	0	0	0	0	100	0	0	0	0
PF06480	0	0	23	0	0	0	0	0	0	76.9
PF06485	0	0	0	0	0	0	0	0	0	100
PF06487	0	100	0	0	0	0	0	0	0	0
PF06507	0	100	0	0	0	0	0	0	0	0
PF06522	0	0	0	0	100	0	0	0	0	0
PF06549	0	0	0	0	0	0	0	0	0	100
PF06552	0	0	100	0	0	0	0	0	0	0
PF06592	0	0	100	0	0	0	0	0	0	0
PF06596	0	0	0	0	0	0	0	0	0	100
PF06695	0	0	0	0	0	0	0	0	0	100
PF06697	0	0	0	0	0	0	0	0	100	0
PF06703	0	0	0	0	0	100	0	0	0	0
PF06728	0	0	0	0	0	0	0	0	100	0
PF06733	0	0	66.6	0	0	0	0	0	0	33.3
PF06749	0	0	0	0	0	0	0	0	100	0
PF06803	0	0	0	0	0	0	0	0	100	0
PF06807	0	100	0	0	0	0	0	0	0	0
PF06813	0	50	0	0	0	0	0	0	50	0
PF06814	0	0	0	50	0	0	50	0	0	0
PF06827	0	0	0	0	0	0	0	0	0	100
PF06886	0	0	0	0	0	0	0	0	0	50
PF06911	0	0	0	0	0	0	0	0	100	0
PF06916	0	0	0	0	0	0	0	0	0	100
PF06925	0	0	0	0	0	0	0	0	0	100
PF06955	0	0	0	0	0	0	0	0	100	0
PF06957	0	0	0	0	0	0	0	0	100	0
PF06962	0	0	0	0	0	0	0	0	0	100
PF06963	0	0	0	100	0	0	0	0	0	0
PF06966	0	0	0	0	0	0	0	0	100	0
PF06974	0	0	0	0	0	100	0	0	0	0
PF06991	0	0	0	0	0	0	0	0	0	100
PF07002	0	0	0	0	0	0	0	0	100	0
PF07011	0	100	0	0	0	0	0	0	0	0
PF07036	0	0	0	0	0	0	0	0	0	100
PF07039	0	100	0	0	0	0	0	0	0	0
PF07058	0	0	0	0	0	0	0	0	66.6	0
PF07059	0	0	0	0	0	0	0	0	100	0
PF07082	0	0	0	0	0	0	0	0	0	100
PF07109	0	0	0	0	0	0	0	0	0	100
PF07123	0	0	0	0	0	0	0	0	0	100
PF07137	0	0	0	0	0	0	0	0	0	100
PF07168	0	0	0	0	0	0	0	0	50	50
PF07173	0	0	0	0	0	0	0	0	100	0
PF07207	0	0	0	0	0	0	0	0	0	100
PF07224	0	0	0	100	0	0	0	0	0	0
PF07227	0	100	0	0	0	0	0	0	0	0
PF07244	0	0	0	0	0	0	0	0	0	100
PF07298	0	0	0	0	0	0	0	0	0	100
PF07320	0	0	0	0	0	0	0	0	77.7	22.2
PF07343	0	0	0	100	0	0	0	0	0	0
PF07393	0	0	0	0	0	0	0	0	100	0
PF07466	0	0	0	0	0	0	0	0	0	100
PF07479	0	0	0	0	0	0	0	100	0	0
PF07496	0	100	0	0	0	0	0	0	0	0
PF07500	0	100	0	0	0	0	0	0	0	0
PF07516	0	0	0	0	0	0	0	0	0	100
PF07517	0	0	0	0	0	0	0	0	0	100
PF07521	0	75	0	0	0	0	0	0	0	25
PF07526	0	100	0	0	0	0	0	0	0	0
PF07529	50	50	0	0	0	0	0	0	0	0
PF07539	0	0	0	0	0	0	100	0	0	0
PF07541	0	100	0	0	0	0	0	0	0	0
PF07569	0	100	0	0	0	0	0	0	0	0
PF07645	0	0	0	0	0	0	0	0	100	0
PF07646	0	12.5	0	0	12.5	0	25	25	25	0
PF07649	0	50	0	0	0	0	0	0	0	50
PF07650	0	0	0	0	0	0	0	50	0	50
PF07651	0	0	0	0	0	0	0	0	100	0
PF07683	0	0	0	0	0	0	0	0	0	100
PF07687	0	0	0	33.3	0	66.6	0	0	0	0
PF07690	0	0	0	17.6	0	0	5.8	0	47	29.4
PF07712	0	0	0	100	0	0	0	0	0	0
PF07713	0	100	0	0	0	0	0	0	0	0
PF07714	0	1.8	0	0	0	1.8	0	7.2	89	0
PF07716	0	100	0	0	0	0	0	0	0	0
PF07717	0	66.6	0	0	0	0	0	0	0	33.3
PF07719	14.2	14.2	14.2	0	0	14.2	0	0	14.2	28.5
PF07722	0	0	0	100	0	0	0	0	0	0
PF07723	0	25	0	25	0	0	0	0	25	25
PF07724	0	0	16.6	0	0	0	0	0	0	83.3
PF07725	0	16.6	33.3	0	0	0	0	0	16.6	33.3
PF07728	0	0	0	0	0	0	0	0	0	100
PF07731	28.5	0	0	0	0	14.2	0	0	57.1	0
PF07732	28.5	0	0	0	0	14.2	0	0	57.1	0
PF07734	0	50	0	25	0	0	0	0	0	25
PF07738	0	50	0	0	0	0	0	0	50	0
PF07748	0	0	0	50	0	0	50	0	0	0
PF07749	0	0	0	0	0	100	0	0	0	0
PF07765	0	20	0	0	0	0	0	0	80	0
PF07766	0	0	50	0	0	0	0	0	0	50
PF07777	0	50	0	0	0	0	0	50	0	0
PF07797	0	0	0	0	0	0	0	0	0	100
PF07798	0	0	100	0	0	0	0	0	0	0
PF07807	0	100	0	0	0	0	0	0	0	0
PF07808	0	100	0	0	0	0	0	0	0	0
PF07816	0	0	0	0	0	0	0	0	100	0
PF07819	0	0	0	0	0	0	0	0	0	100
PF07821	50	0	0	0	0	0	0	0	0	50
PF07839	0	0	0	0	0	0	0	0	100	0
PF07842	0	100	0	0	0	0	0	0	0	0
PF07844	0	0	0	0	0	0	0	0	100	0
PF07859	0	100	0	0	0	0	0	0	0	0
PF07876	0	0	0	0	0	0	0	25	25	50
PF07883	0	100	0	0	0	0	0	0	0	0
PF07884	0	0	0	0	0	0	0	0	0	100
PF07885	0	0	0	100	0	0	0	0	0	0
PF07890	0	100	0	0	0	0	0	0	0	0
PF07897	0	100	0	0	0	0	0	0	0	0
PF07899	0	100	0	0	0	0	0	0	0	0
PF07928	0	0	0	0	0	0	0	0	0	100
PF07939	0	0	0	0	0	0	0	0	0	100
PF07944	0	0	0	100	0	0	0	0	0	0
PF07946	0	0	0	0	0	100	0	0	0	0
PF07967	0	100	0	0	0	0	0	0	0	0
PF07970	0	0	0	0	0	50	0	0	50	0
PF07973	0	0	0	0	0	0	0	0	0	100
PF07977	0	0	0	0	0	0	0	0	0	100
PF07983	0	0	0	0	0	0	0	0	100	0
PF07985	0	100	0	0	0	0	0	0	0	0
PF07990	0	0	0	0	0	0	0	0	100	0
PF07991	0	0	0	0	0	0	0	0	0	100
PF07992	0	0	38	0	4.7	0	0	9.5	9.5	38
PF07993	0	0	0	0	0	33.3	0	0	0	66.6
PF08022	0	0	0	12.5	0	0	0	0	75	12.5
PF08029	0	0	0	0	0	0	0	0	0	100
PF08030	0	0	0	12.5	0	0	0	0	75	12.5
PF08031	0	0	0	0	0	0	0	0	100	0
PF08032	0	0	0	0	0	0	0	0	0	100
PF08041	0	0	0	0	0	0	0	0	0	100
PF08060	0	100	0	0	0	0	0	0	0	0
PF08071	0	0	0	0	0	0	0	0	100	0
PF08082	0	0	0	0	0	0	0	0	0	100
PF08083	0	0	0	0	0	0	0	0	0	100
PF08084	0	0	0	0	0	0	0	0	0	100
PF08127	0	0	0	100	0	0	0	0	0	0
PF08137	0	0	0	0	0	0	0	0	100	0
PF08148	0	0	0	50	0	0	0	0	0	50
PF08152	0	50	0	0	0	0	0	0	0	50
PF08154	0	100	0	0	0	0	0	0	0	0
PF08156	0	100	0	0	0	0	0	0	0	0
PF08159	0	100	0	0	0	0	0	0	0	0
PF08172	0	0	0	0	0	0	100	0	0	0
PF08207	0	0	0	0	0	0	0	0	0	100
PF08212	0	0	0	0	0	0	0	0	0	100
PF08235	100	0	0	0	0	0	0	0	0	0
PF08238	0	50	0	0	0	50	0	0	0	0
PF08240	20	0	0	0	40	0	0	0	20	20
PF08241	0	11.1	11.1	11.1	0	11.1	0	0	11.1	44.4
PF08242	0	100	0	0	0	0	0	0	0	0
PF08244	0	0	0	100	0	0	0	0	0	0
PF08245	0	0	25	0	0	0	0	25	0	50
PF08246	0	0	0	100	0	0	0	0	0	0
PF08263	0	0	4	0	0	0	1.3	0	87.8	6.7
PF08264	0	0	0	0	0	0	0	0	0	100
PF08267	0	0	0	0	0	0	0	100	0	0
PF08268	0	0	0	0	0	0	0	0	33.3	66.6
PF08271	0	100	0	0	0	0	0	0	0	0
PF08276	0	16.6	0	0	0	0	0	16.6	66.6	0
PF08282	0	0	0	0	0	0	0	0	100	0
PF08294	0	0	100	0	0	0	0	0	0	0
PF08321	0	100	0	0	0	0	0	0	0	0
PF08323	0	0	0	0	0	0	0	0	0	100
PF08326	0	0	0	0	0	0	0	0	100	0
PF08328	0	0	0	0	0	0	0	0	0	100
PF08338	0	0	0	0	0	0	0	0	0	100
PF08355	0	0	100	0	0	0	0	0	0	0
PF08356	0	0	100	0	0	0	0	0	0	0
PF08367	0	0	0	0	0	0	0	0	0	100
PF08370	0	0	0	0	0	0	0	0	100	0
PF08372	0	0	0	0	0	50	0	0	25	25
PF08375	0	0	0	0	0	0	0	0	100	0
PF08381	0	50	0	0	0	0	0	0	50	0
PF08387	0	50	0	0	0	0	0	0	0	50
PF08392	0	0	0	0	0	100	0	0	0	0
PF08414	0	0	0	20	0	0	0	0	80	0
PF08417	0	0	0	0	0	0	0	0	0	100
PF08436	0	0	0	0	0	0	0	0	0	100
PF08442	0	0	50	0	0	0	0	50	0	0
PF08446	0	100	0	0	0	0	0	0	0	0
PF08449	0	0	0	0	0	50	50	0	0	0
PF08458	0	0	0	0	0	0	0	0	100	0
PF08472	0	50	0	0	0	0	0	0	50	0
PF08477	0	33.3	66.6	0	0	0	0	0	0	0
PF08488	0	0	0	0	0	0	0	0	100	0
PF08490	100	0	0	0	0	0	0	0	0	0
PF08498	0	0	0	50	0	50	0	0	0	0
PF08501	0	0	0	0	0	0	0	0	0	100
PF08502	0	0	0	0	0	0	0	0	0	100
PF08511	0	0	100	0	0	0	0	0	0	0
PF08512	0	100	0	0	0	0	0	0	0	0
PF08513	0	100	0	0	0	0	0	0	0	0
PF08514	0	100	0	0	0	0	0	0	0	0
PF08523	0	100	0	0	0	0	0	0	0	0
PF08534	0	0	25	0	0	0	0	0	25	50
PF08536	0	0	33.3	0	0	0	0	0	0	66.6
PF08541	0	0	0	0	0	83.3	0	0	0	16.6
PF08542	0	100	0	0	0	0	0	0	0	0
PF08543	0	0	0	0	0	0	0	0	0	100
PF08544	0	0	0	0	0	0	0	0	0	100
PF08545	0	0	0	0	0	0	0	0	0	100
PF08547	0	0	50	0	0	0	0	0	0	50
PF08569	0	0	0	0	0	0	0	0	100	0
PF08585	0	0	100	0	0	0	0	0	0	0
PF08606	0	50	0	0	0	0	0	0	0	50
PF08610	0	0	0	0	100	0	0	0	0	0
PF08623	0	0	0	0	0	0	0	0	100	0
PF08625	0	100	0	0	0	0	0	0	0	0
PF08631	0	0	0	0	0	0	0	0	0	100
PF08637	0	0	100	0	0	0	0	0	0	0
PF08644	0	100	0	0	0	0	0	0	0	0
PF08646	0	100	0	0	0	0	0	0	0	0
PF08648	0	0	0	0	0	0	0	100	0	0
PF08662	0	0	0	0	0	0	0	0	100	0
PF08669	0	0	0	0	0	0	0	0	0	100
PF08670	0	100	0	0	0	0	0	0	0	0
PF08693	0	0	0	0	0	0	0	0	100	0
PF08699	0	100	0	0	0	0	0	0	0	0
PF08700	0	0	0	0	0	0	0	0	100	0
PF08701	0	100	0	0	0	0	0	0	0	0
PF08711	0	50	0	0	0	0	0	50	0	0
PF08712	0	0	100	0	0	0	0	0	0	0
PF08718	0	0	0	0	0	0	0	0	100	0
PF08744	0	100	0	0	0	0	0	0	0	0
PF08752	0	0	0	0	0	0	0	0	0	100
PF08755	0	0	0	0	0	0	0	0	0	100
PF08766	0	0	100	0	0	0	0	0	0	0
PF08777	0	100	0	0	0	0	0	0	0	0
PF08781	0	100	0	0	0	0	0	0	0	0
PF08784	0	100	0	0	0	0	0	0	0	0
PF08797	0	0	0	0	0	0	0	0	0	100
PF08799	0	100	0	0	0	0	0	0	0	0
PF08801	0	0	0	0	0	0	0	0	0	100
PF08802	0	0	0	0	0	0	0	0	0	100
PF08847	0	0	0	0	0	0	0	0	0	100
PF08879	0	0	0	0	0	0	0	0	0	100
PF08880	0	50	0	0	0	0	0	0	0	50
PF08920	0	0	0	0	0	0	0	0	0	100
PF09066	0	0	0	0	0	0	0	0	100	0
PF09072	0	0	0	0	0	0	0	0	100	0
PF09088	0	100	0	0	0	0	0	0	0	0
PF09090	0	100	0	0	0	0	0	0	0	0
PF09103	0	0	100	0	0	0	0	0	0	0
PF09169	0	0	100	0	0	0	0	0	0	0
PF09177	0	100	0	0	0	0	0	0	0	0
PF09180	0	0	0	0	0	0	0	0	0	100
PF09258	0	0	0	0	0	0	100	0	0	0
PF09261	0	0	0	50	0	0	50	0	0	0
PF09265	0	0	0	66.6	0	33.3	0	0	0	0
PF09268	0	0	0	0	0	0	0	0	50	50
PF09269	0	0	0	0	0	0	0	0	0	100
PF09273	0	0	0	0	0	0	0	0	0	100
PF09279	0	0	0	0	0	0	0	0	100	0
PF09282	0	100	0	0	0	0	0	0	0	0
PF09285	0	0	0	0	0	0	0	0	0	100
PF09297	0	0	0	0	0	0	0	0	0	100
PF09320	0	0	0	0	0	0	0	0	100	0
PF09324	0	0	0	0	0	0	0	0	0	100
PF09325	0	0	0	0	0	0	0	0	0	0
PF09326	0	0	100	0	0	0	0	0	0	0
PF09335	0	0	0	0	0	33.3	0	0	33.3	33.3
PF09336	0	0	0	0	0	0	0	0	0	0
PF09340	0	0	0	100	0	0	0	0	0	0
PF09348	0	0	0	0	0	0	0	0	0	100
PF09353	0	0	0	0	0	0	0	0	0	100
PF09358	0	0	0	0	0	0	0	0	100	0
PF09360	0	0	0	0	0	0	0	0	0	100
PF09366	0	0	0	0	0	0	0	0	0	100
PF09379	0	0	0	0	0	0	0	0	100	0
PF09384	0	100	0	0	0	0	0	0	0	0
PF09405	0	0	0	0	0	0	0	100	0	0
PF09416	0	0	0	0	0	0	0	0	100	0
PF09425	0	100	0	0	0	0	0	0	0	0
PF09429	0	100	0	0	0	0	0	0	0	0
PF09430	0	0	0	0	0	100	0	0	0	0
PF09454	0	0	0	0	0	0	0	0	0	0
PF09733	0	100	0	0	0	0	0	0	0	0
PF09737	0	100	0	0	0	0	0	0	0	0
PF09763	0	0	0	0	0	0	0	0	100	0
PF09767	0	0	100	0	0	0	0	0	0	0
PF09790	0	0	0	0	0	0	0	0	100	0
PF10063	0	0	0	0	0	0	0	0	0	100
PF10075	0	100	0	0	0	0	0	0	0	0
PF10150	0	0	0	0	0	0	0	0	0	100
PF10163	0	0	0	0	0	0	0	0	0	100
PF10184	0	0	0	0	0	0	0	0	0	100
PF10219	0	0	0	0	0	0	0	0	100	0
PF10255	0	0	0	0	0	0	0	0	100	0
PF10269	0	0	0	100	0	0	0	0	0	0
PF10276	0	0	100	0	0	0	0	0	0	0
PF10296	0	0	0	100	0	0	0	0	0	0
PF10347	0	0	0	0	0	0	0	0	100	0
PF10351	0	0	0	0	0	0	0	0	100	0
PF10369	0	0	0	0	0	0	0	0	0	100
PF10394	0	100	0	0	0	0	0	0	0	0
PF10403	0	0	0	0	0	0	0	0	0	100
PF10404	0	0	0	0	0	0	0	0	0	100
PF10405	0	0	0	0	0	0	0	0	0	100
PF10415	0	0	100	0	0	0	0	0	0	0
PF10417	0	0	0	0	0	0	0	0	0	100
PF10431	0	0	16.6	0	0	0	0	0	0	83.3
PF10440	0	100	0	0	0	0	0	0	0	0
PF10458	0	0	0	0	0	0	0	0	0	100
PF10508	0	0	0	0	0	0	0	0	100	0
PF10531	0	0	100	0	0	0	0	0	0	0
PF10545	0	100	0	0	0	0	0	0	0	0
PF10551	0	100	0	0	0	0	0	0	0	0
PF10557	0	66.6	0	0	0	0	0	0	0	33.3
PF10568	0	0	100	0	0	0	0	0	0	0
PF10576	0	50	0	0	0	0	0	0	0	50
PF10584	0	0	0	20	0	0	0	0	80	0
PF10585	0	0	0	0	0	0	0	50	50	0
PF10588	0	0	100	0	0	0	0	0	0	0
PF10589	0	0	100	0	0	0	0	0	0	0
PF10596	0	0	0	0	0	0	0	0	0	100
PF10597	0	0	0	0	0	0	0	0	0	100
PF10598	0	0	0	0	0	0	0	0	0	100
PF10602	0	50	0	0	0	0	0	0	50	0
PF10609	0	0	0	0	0	0	0	50	0	50
PF10615	0	0	0	0	0	0	0	0	0	100
PF10664	0	0	0	0	0	0	0	0	0	100
PF10674	0	0	0	0	0	0	0	0	0	100
PF10714	0	0	0	0	0	0	0	0	100	0
