# Supplementary material for: An Integrative Approach to the Identification of Arabidopsis and Rice Genes Involved in Xylan and Secondary Wall Development
Source: PLoS One. 2010 Nov 23;5(11):e15481. doi: 10.1371/journal.pone.0015481 (PMC2990762; doi:10.1371/journal.pone.0015481)
Supplement: Table S7 — The specificities and sensitivities of each predictor in ten subcellular compartments. (XLS) [file pone.0015481.s010.xls]

## Sheet: Table S7
Table S7. The specificities and sensitivities of each predictor in ten subcellular compartments. The Pfam-based localization algorithm (PFANTOM) was compared with the results from predictors that were made available in the SUBA database (http://suba.plantenergy.uwa.edu.au/; Heazlewood et al. [38]).
Sensitivities
subcellular components	PFANTOM	Subcellular Predictors (SUBA)
		all_predictors	wolfpsort	targetp	mitoprot2	subloc	ipsort	predotar	mitopred	peroxp	multiloc	loctree
nucleus	85.3121	76.3466	59.719	0	0	63.7002	0	0	0	0	0	0
plastid	72.1785	84.7716	68.3104	69.6882	0	0	53.8796	62.0015	0	0	63.3793	60.4786
peroxisome	71.5789	48.8889	35.5556	0	0	0	0	0	0	43.3333	0	0
golgi	70	2.22222	2.22222	0	0	0	0	0	0	0	0	0
ER	74.4048	56.7568	8.10811	0	0	0	0	52.2523	0	0	0	0
vacuole	64.8415	11.9048	11.9048	0	0	0	0	0	0	0	0	0
mitochondrion	74.463	83.5544	27.5862	49.6021	53.0504	33.9523	57.5597	51.1936	50.9284	0	38.992	24.6684
extracellular	65.8228	96.9697	30.303	87.8788	0	36.3636	0	0	0	0	0	57.5758
cytosol	69.9507	85.7143	57.1429	0	0	61.9048	0	0	0	0	0	42.8571
PM	84.4146	30.5369	30.5369	0	0	0	0	0	0	0	0	0
Specificities
subcellular components	PFANTOM	Subcellular Predictors (SUBA)
		all_predictors	wolfpsort	targetp	mitoprot2	subloc	ipsort	predotar	mitopred	peroxp	multiloc	loctree
nucleus	84.1549	68.7902	87.5943	-	-	73.2048	-	-	-	-	-	-
plastid	76.2173	57.6323	82.2992	89.1892	-	-	92.4629	96.3076	-	-	88.0472	82.756
peroxisome	97.5512	95.4035	99.0807	-	-	-	-	-	-	95.761	-	-
golgi	97.8458	99.5403	99.5403	-	-	-	-	-	-	-	-	-
endoplasmic reticulum	97.0462	86.4185	99.1784	-	-	-	-	87.0603	-	-	-	-
vacuole	91.2262	97.4694	97.4694	-	-	-	-	-	-	-	-	-
mitochondrion	89.0296	40.6172	97.6853	92.2568	75.8887	83.0807	82.9981	94.0755	72.6922	-	89.7768	91.5404
extracellular	97.6391	73.2947	97.8857	86.1566	-	85.1749	-	-	-	-	-	91.9456
cytosol	96.5121	55.1568	85.872	-	-	66.399	-	-	-	-	-	88.256
plasma membrane	75.5311	91.6134	91.6134	-	-	-	-	-	-	-	-	-
-Specificty of 100% which is corresponding to sensitivity 0%
